# Supplementary material
Source: PubMed Central journal article supplement (PMC5558205)
Supplement: NIHMS890189-supplement-SI1.pdf [file NIHMS890189-supplement-SI1.pdf]

# **Type II Anion Relay Chemistry: Conformational Constraints to Achieve Effective [1,5]-Vinyl Brook Rearrangements**

Qi Liu,<sup>†</sup> Yu Chen,<sup>‡</sup> Xiao Zhang,<sup>‡</sup> K. N. Houk,<sup>§</sup> Yong Liang,<sup>‡\*</sup> Amos B. Smith, III<sup>†\*</sup>

<sup>†</sup> Department of Chemistry, University of Pennsylvania, Philadelphia, Pennsylvania 19104, United States

<sup>‡</sup> State Key Laboratory of Coordination Chemistry, School of Chemistry and Chemical Engineering, Nanjing University, Nanjing, 210023, China

<sup>§</sup> Department of Chemistry and Biochemistry, University of California, Los Angeles, California 90095, United States

## I. Materials and methods

Reactions were performed in either flame- or oven-dried glassware under a nitrogen atmosphere with anhydrous solvents, unless noted otherwise. Anhydrous diethyl ether (Et<sub>2</sub>O) and tetrahydrofuran (THF) were obtained from a solvent purification system. Hexamethylphosphoramide (HMPA) and trimethylsilyl chloride (TMSCl) was freshly purified prior to use by distillation over calcium hydride and stored in calcium hydride under nitrogen atmosphere. Commercial lithium reagents were titrated with 2,2-diphenylacetic acid before use. All other commercially available reagents were used as received, unless otherwise noted. Reactions were magnetically stirred unless stated otherwise and monitored by thin-layer chromatography (TLC) with 0.25 mm precoated silica gel plates. Silica gel chromatography was performed utilizing ACS grade solvents and silica gel (particle size 40-63 μm). Medium pressure liquid chromatography was conducted by using a medium-pressure pump equipped with a high-pressure glass column (350 mm × 35 mm or 350 mm × 10 mm) packed with silica gel (standard grade, porosity 60 Å, particle size 32–63 μm). <sup>1</sup>H NMR spectra (500 MHz field strength) and <sup>13</sup>C NMR spectra (125 MHz field strength) were recorded on a 500 MHz spectrometer. Chemical shifts are reported relative to chloroform (δ 7.26) and benzene (δ 7.16) for <sup>1</sup>H NMR spectra and chloroform (δ 77.16) and benzene (δ 128.06) for <sup>13</sup>C spectra. The following abbreviations are used to describe multiplicities in <sup>1</sup>H NMR spectra: s (singlet), d (doublet), dd (doublet of doublets), ddd (doublet of doublet of doublets), dt (doublet of triplets), dq (doublet of quartets), t (triplet), td (triplet of doublets), m (multiplet), q (quartet), and app (apparent). Infrared spectra were obtained using a FT/IR plus spectrometer. High-resolution mass spectra (HRMS) were measured on a LC-TOF mass spectrometer. Melting points were obtained on a Thomas-Hoover apparatus and are uncorrected. Single crystal X-ray structures were determined on a detector employing graphite-monochromated Mo-Kα radiation (λ=0.71073Å) at a temperature of 143(1) K.

## II. Experiment Section

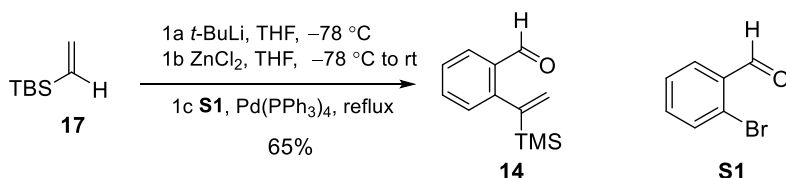

### Preparation of phenyl linchpin **14**

**2-(1-(Trimethylsilyl)vinyl)benzaldehyde (14).** To a solution of (1-bromovinyl)trimethylsilane (**17**) (1.94 g, 10.8 mmol) in THF (20 mL) was added *tert*-BuLi (16.5 mL, 21.6 mmol) dropwise at  $-78\text{ }^{\circ}\text{C}$ . The resulting solution was stirred at  $-78\text{ }^{\circ}\text{C}$  for 30 min before the addition of a  $\text{ZnCl}_2$  solution (27.4 mL, freshly prepared from flame-dried  $\text{ZnCl}_2$  solid, 1 M in THF). The reaction mixture was then warmed to  $-20\text{ }^{\circ}\text{C}$  and stirred for another 30 min. The cooling bath was removed and a solution of  $\text{Pd}(\text{PPh}_3)_4$  (416 mg, 0.36 mmol) and 2-bromobenzaldehyde (**S1**, 1.34 g, 7.2 mmol) in THF (20 mL) was added at room temperature. The resulting mixture was stirred vigorously for 12 hours at reflux temperature before it was cooled to room temperature. The reaction mixture was then quenched with a saturated aqueous solution of  $\text{NH}_4\text{Cl}$  (20 mL), and extracted with  $\text{Et}_2\text{O}$  ( $4 \times 20\text{ mL}$ ). The combined organic phases were washed with brine, dried over  $\text{Na}_2\text{SO}_4$ , filtered and concentrated. The crude material was purified by flash chromatography on silica gel (2:1  $\text{CH}_2\text{Cl}_2$ /hexanes) to provide a pale-yellow oil (0.96 g, 65%).

IR (neat) 3057, 2956, 2843, 2747, 1694, 1597, 1475, 1389, 1250, 1194, 841, 773  $\text{cm}^{-1}$ .

$^1\text{H}$  NMR (500 MHz,  $\text{CDCl}_3$ )  $\delta$  10.11 (s, 1H), 7.93 (d,  $J = 7.4\text{ Hz}$ , 1H), 7.51 (dd,  $J = 8.5, 7.5\text{ Hz}$ , 1H), 7.34 (dd,  $J = 8.5, 7.8\text{ Hz}$ , 1H), 7.07 (d,  $J = 7.8\text{ Hz}$ , 1H), 5.91 (d,  $J = 3.0\text{ Hz}$ , 1H), 5.72 (d,  $J = 3.0\text{ Hz}$ , 1H), 0.12 (s, 9H).

$^{13}\text{C}$  NMR (125 MHz,  $\text{CDCl}_3$ )  $\delta$  192.6, 151.4, 149.4, 133.5, 133.0, 130.7, 128.9, 127.7, 126.6, -1.6.

HRMS ( $\text{CI}^+$ )  $m/z$  189.0737 [(M-Me) $^+$ ; calcd for  $\text{C}_{11}\text{H}_{13}\text{OSi}$  189.0736].

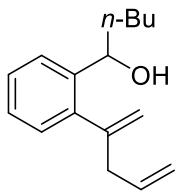

Three-component coupling of linchpin **14** via ARC/alkylation. Example:

**1-(2-(Penta-1,4-dien-2-yl)phenyl)pentan-1-ol (15a).**

General procedures

**Condition a:** To a solution of linchpin **14** (50 mg, 0.245 mmol) in Et<sub>2</sub>O (0.5 mL) at -78 °C was added *n*-BuLi (200 μL, 2.4 M, 0.48 mmol). After 30 min, the resulting solution was transferred to a suspension of CuBr·DMS (98 mg, 0.48 mmol) in HMPA/THF (1 mL, 1:1) via cannula at room temperature. The resulting mixture was stirred for 2 h, followed by the addition of allyl bromide (41 uL, 0.48 mmol). The resulting reaction mixture was stirred for another 2 h, followed by the addition of 1 N HCl (1 mL). After 10 minutes, the reaction mixture was diluted with H<sub>2</sub>O (5 mL) and extracted with Et<sub>2</sub>O (3×5 mL). The combined organic layers were washed with brine (15 mL), dried over anhydrous Na<sub>2</sub>SO<sub>4</sub>, filtered and concentrated. Flash chromatography (2:1 CH<sub>2</sub>Cl<sub>2</sub>/hexanes) afforded compound **15a** (41 mg, 73%) as a colorless oil.

**Condition b:** To a solution of linchpin **14** (50 mg, 0.245 mmol) in THF (0.5 mL) at -78 °C was added *n*-BuLi (110 μL, 2.4 M, 0.26 mmol). After 30 min, the resulting solution was transferred to a suspension of CuBr·DMS (98 mg, 0.48 mmol) in HMPA (0.5 mL) via cannula at room temperature, followed by the addition of *t*-BuOK (240 uL, 1 M in THF). The resulting mixture was stirred for 30 min, followed by the addition of allyl bromide (41 uL, 0.48 mmol). The resulting reaction mixture was stirred for 2 h, followed by the addition of 1 N HCl (1 mL). After 10 minutes, the reaction mixture was diluted with H<sub>2</sub>O (5 mL) and extracted with Et<sub>2</sub>O (3×5 mL). The combined organic layers were washed with brine (15 mL), dried over anhydrous Na<sub>2</sub>SO<sub>4</sub>, filtered and concentrated. Flash chromatography (2:1 CH<sub>2</sub>Cl<sub>2</sub>/hexanes) afforded compound **15a** (42 mg, 74%) as a colorless oil.

IR(neat) 3367 (br), 3077, 2956, 2931, 2859, 1638, 1430, 1045, 997, 910, 761  $\text{cm}^{-1}$ .

$^1\text{H}$  NMR (500 MHz,  $\text{CDCl}_3$ )  $\delta$  7.52 (dd,  $J = 7.8, 1.4$  Hz, 1H), 7.31 (ddd,  $J = 8.3, 7.6, 1.5$  Hz, 1H), 7.23 (ddd,  $J = 8.3, 7.5, 1.4$  Hz, 1H), 7.08 (dd,  $J = 7.6, 1.4$  Hz, 1H), 5.90-5.79 (m, 1H), 5.24 (q,  $J = 1.6$  Hz, 1H), 5.10 – 5.02 (m, 2H), 4.92-4.90 (m, 1H), 4.88 – 4.83 (m, 1H), 3.11 – 2.99 (m, 2H), 1.85 – 1.76 (m, 1H), 1.73-1.65 (m, 2 H), 1.47 – 1.40 (m, 1H), 1.37 – 1.25 (m, 3H), 0.89 (t,  $J = 7.1$  Hz, 3H).

$^{13}\text{C}$  NMR (125 MHz,  $\text{CDCl}_3$ )  $\delta$  147.6, 141.9, 141.7, 135.5, 128.6, 127.7, 127.1, 125.8, 117.0, 115.5, 70.7, 43.5, 38.6, 28.6, 22.7, 14.2.

HRMS ( $\text{ES}^+$ )  $m/z$  213.1637 [(M-OH) $^+$ ]; calcd for  $\text{C}_{16}\text{H}_{21}$  213.1643].

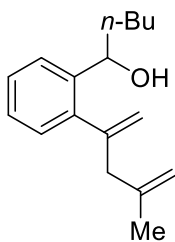

**1-(2-(4-Methylpenta-1,4-dien-2-yl)phenyl)pentan-1-ol (15b).**

Colorless oil (condition a: 41 mg, 68%; condition b: 43 mg, 73%).

IR (neat) 3367 (br), 3077, 2956, 2931, 2859, 1638, 1430, 1045, 997, 910, 761  $\text{cm}^{-1}$ .

$^1\text{H}$  NMR (500 MHz,  $\text{CDCl}_3$ )  $\delta$  7.51 (d,  $J = 8.3$  Hz, 1H), 7.30 (dd,  $J = 8.6, 7.7$  Hz, 1H), 7.21 (dd,  $J = 8.1, 7.8$  Hz, 1H), 7.07 (d,  $J = 7.5$  Hz, 1H), 5.26 (s, 1H), 4.95 (s, 1H), 4.89 – 4.84 (m, 1H), 4.82 (s, 1H), 4.65 (s, 1H), 3.03 (s, 2H), 1.86 – 1.78 (m, 1H), 1.77 (s, 3H), 1.73 – 1.64 (m, 2H), 1.49 – 1.40 (m, 1H), 1.39 – 1.24 (m, 3H), 0.89 (t,  $J = 8.9$  Hz, 3H).

$^{13}\text{C}$  NMR (125 MHz,  $\text{CDCl}_3$ )  $\delta$  146.5, 142.6, 142.0, 141.7, 128.6, 127.6, 127.1, 125.8, 116.4, 113.7, 70.6, 47.9, 38.5, 28.6, 22.8, 22.3, 14.2.

HRMS ( $\text{ES}^+$ )  $m/z$  267.1722 [(M+Na) $^+$ ]; calcd for  $\text{C}_{17}\text{H}_{24}\text{ONa}$  267.1725].

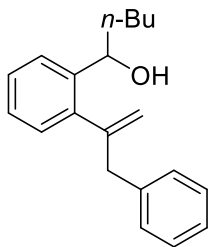

**1-(2-(3-Phenylprop-1-en-2-yl)phenyl)pentan-1-ol (15c).**

Colorless oil (condition a: 48 mg, 70%; condition b: 50 mg, 73%).

IR (neat) 3389 (br), 3062, 3027, 2955, 2930, 2858, 1637, 1601, 1494, 1453, 1044, 905, 762, 731, 699  $\text{cm}^{-1}$ .

$^1\text{H}$  NMR (500 MHz,  $\text{CDCl}_3$ )  $\delta$  7.44 (d,  $J = 7.8$  Hz, 1H), 7.31 – 7.28 (m, 1H), 7.26 – 7.17 (m, 4H), 7.11 – 7.05 (m, 1H), 5.24 (s, 1H), 4.88 (s, 1H), 4.65 – 4.59 (m, 1H), 3.67 (d,  $J = 14.6$  Hz, 1H), 3.63 (d,  $J = 14.6$  Hz, 1H), 1.75 – 1.67 (m, 1H), 1.54 – 1.46 (m, 1H), 1.39 – 1.25 (m, 3H), 1.21 – 1.12 (m, 1H), 1.06 (d,  $J = 3.3$  Hz, 1H), 0.88 (t,  $J = 7.2$  Hz, 3H).

$^{13}\text{C}$  NMR (125 MHz,  $\text{CDCl}_3$ )  $\delta$  148.3, 142.3, 140.9, 138.7, 129.5, 128.4, 128.3, 127.6, 127.0, 126.5, 125.9, 116.0, 70.5, 46.3, 38.3, 28.5, 22.7, 14.2.

HRMS ( $\text{ES}^+$ )  $m/z$  263.1806 [(M-OH) $^+$ ; calcd for  $\text{C}_{20}\text{H}_{23}$  263.1800].

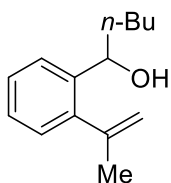

**1-(2-(Prop-1-en-2-yl)phenyl)pentan-1-ol (15d).**

Colorless oil (condition b: 38 mg, 77%).

IR (neat) 3359 (br), 3075, 2957, 2859, 1640, 1374, 1300, 1046, 1004, 900, 761  $\text{cm}^{-1}$

$^1\text{H}$  NMR (500 MHz,  $\text{CDCl}_3$ )  $\delta$  7.52 (d,  $J = 7.8$  Hz, 1H), 7.30 (dd,  $J = 8.2, 7.8$  Hz, 1H), 7.23 (dd,  $J = 8.2, 7.8$  Hz, 1H), 7.11 (d,  $J = 7.8$  Hz, 1H), 5.22 (s, 1H), 4.94 – 4.88 (m, 1H), 4.84 (s, 1H), 2.07 (s, 3H), 1.85 – 1.74 (m, 2H), 1.73 – 1.66 (m, 1H), 1.49 – 1.40 (m, 1H), 1.38 – 1.24 (m, 3H), 0.89 (t,  $J = 7.1$  Hz, 3H).

$^{13}\text{C}$  NMR (125 MHz,  $\text{CDCl}_3$ )  $\delta$  145.1, 142.7, 141.6, 128.1, 127.5, 127.2, 125.8, 115.7,

70.7, 38.8, 28.5, 25.9, 22.7, 14.2.

HRMS (ES<sup>+</sup>) *m/z* 227.1401 [(M+Na)<sup>+</sup>; calcd for C<sub>14</sub>H<sub>20</sub>ONa 227.1412].

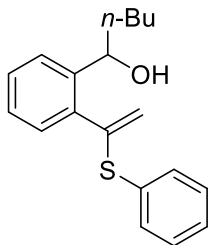

**1-(2-(1-(Phenylthio)vinyl)phenyl)pentan-1-ol (15e).**

Pale-yellow oil (condition a: 44 mg, 61%; condition b: 40 mg, 56%).

IR (neat) 3073, 2959, 1766, 1716, 1466, 1285, 1023, 743, 690 cm<sup>-1</sup>.

<sup>1</sup>H NMR (500 MHz, CDCl<sub>3</sub>) δ 7.53 – 7.49 (m, 3H), 7.38 – 7.29 (m, 4H), 7.26 – 7.20 (m, 2H), 5.15 – 5.11 (m, 1H), 5.11 (s, 1H), 5.05 (s, 1H), 1.86 – 1.79 (m, 1H), 1.78 (d, *J* = 3.2 Hz, 1H), 1.75 – 1.71 (m, 1H), 1.50 – 1.42 (m, 1H), 1.38 – 1.28 (m, 3H), 0.90 (t, *J* = 7.1 Hz, 3H).

<sup>13</sup>C NMR (125 MHz, CDCl<sub>3</sub>) δ 145.4, 143.0, 137.9, 135.1, 131.9, 129.8, 129.5, 129.1, 128.9, 127.2, 126.0, 113.4, 70.4, 38.2, 28.6, 22.8, 14.2.

HRMS (ES<sup>+</sup>) *m/z* 297.1319 [(M-H)<sup>+</sup>; calcd for C<sub>19</sub>H<sub>21</sub>OS 297.1313].

Three-component coupling of linchpin **15** via ARC/CCR.

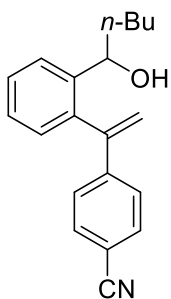

**4-(1-(2-(1-(Hydroxypentyl)phenyl)vinyl)benzonitrile (16a).**

General procedures

**Condition a:** To a solution of linchpin **14** (50 mg, 0.245 mmol) in Et<sub>2</sub>O (0.5 mL) at

-78 °C was added *n*-BuLi (200 µL, 2.4 M, 0.48 mmol). After 30 min, the resulting solution was transferred to a suspension of CuBr·DMS (98 mg, 0.48 mmol) in HMPA/THF (1 mL, 1:1) via cannula at room temperature. The resulting mixture was stirred for 2 h, followed by the addition of a pre-mixed solution of 4-iodobenzonitrile (110 mg, 0.48 mmol) and Pd(PPh<sub>3</sub>)<sub>4</sub> (14 mg, 12 µmol) in THF (0.5 mL). The resulting reaction mixture was stirred overnight, followed by the addition of 1 N HCl (1 mL). After 10 minutes, the reaction mixture was diluted with H<sub>2</sub>O (5 mL) and extracted with Et<sub>2</sub>O (3×5 mL). The combined organic layers were washed with brine (15 mL), dried over anhydrous Na<sub>2</sub>SO<sub>4</sub>, filtered and concentrated. Flash chromatography (1:1:0.0125 CH<sub>2</sub>Cl<sub>2</sub>/hexanes/MeOH) afforded compound **16a**.

**Condition b:** To a solution of linchpin **14** (50 mg, 0.245 mmol) in THF (0.5 mL) at -78 °C was added *n*-BuLi (110 µL, 2.4 M, 0.26 mmol). After 30 min, the resulting solution was transferred to a suspension of CuBr·DMS (98 mg, 0.48 mmol) in HMPA (0.5 mL) via cannula at room temperature, followed by the addition of *t*-BuOK (240 µL, 1 M in THF). The resulting mixture was stirred for 30 min, followed by the addition of a pre-mixed solution of 4-iodobenzonitrile (110 mg, 0.48 mmol) and Pd(PPh<sub>3</sub>)<sub>4</sub> (14 mg, 12 µmol) in THF (0.5 mL). The resulting reaction mixture was stirred overnight, followed by the addition of 1 N HCl (1 mL). After 10 minutes, the reaction mixture was diluted with H<sub>2</sub>O (5 mL) and extracted with Et<sub>2</sub>O (3×5 mL). The combined organic layers were washed with brine (15 mL), dried over anhydrous Na<sub>2</sub>SO<sub>4</sub>, filtered and concentrated. Flash chromatography (1:1:0.0125 CH<sub>2</sub>Cl<sub>2</sub>/hexanes /MeOH) afforded compound **16a**.

Pale-yellow amorphous solid (condition a: 51 mg, 72%; condition b: 50 mg, 70%).

IR (neat) 3447 (br), 3061, 2955, 2845, 2228, 1604, 1504, 1403, 1016, 915, 850, 766 cm<sup>-1</sup>.  
<sup>1</sup>H NMR (500 MHz, CDCl<sub>3</sub>) δ 7.59 (d, *J* = 8.4 Hz, 3H), 7.44 (dd, *J* = 7.6, 7.6 Hz, 1H), 7.37 (d, *J* = 8.2 Hz, 2H), 7.33 (dd, *J* = 7.5, 7.5, 1H), 7.18 (d, *J* = 7.6, 1H), 5.92 (s, 1H), 5.39 (s, 1H), 4.52 (dd, *J* = 8.3, 4.8 Hz, 1H), 1.67 – 1.58 (m, 1H), 1.57 – 1.45 (m, 2H), 1.24 – 1.10 (m, 3H), 1.10 – 1.02 (m, 1H), 0.79 (t, *J* = 7.1 Hz, 3H).



$^{13}\text{C}$  NMR (125 MHz,  $\text{CDCl}_3$ )  $\delta$  147.3, 145.3, 142.9, 138.6, 132.5, 130.3, 128.9, 127.7, 127.1, 126.2, 118.9, 118.9, 111.5, 70.8, 38.4, 28.3, 22.5, 14.1.

HRMS ( $\text{ES}^-$ )  $m/z$  290.1550 [ $(\text{M}-\text{H})^-$ ; calcd for  $\text{C}_{20}\text{H}_{20}\text{NO}$  290.1545].

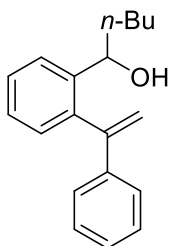

**1-(2-(1-Phenylvinyl)phenyl)pentan-1-ol (16b).**

Pale-yellow oil (condition a: 50 mg, 77%; condition b: 46 mg, 71%).

IR (neat) 3390 (br), 3058, 2955, 2858, 1615, 1494, 1444, 1322, 1028, 903, 760, 710  $\text{cm}^{-1}$

$^1\text{H}$  NMR (500 MHz,  $\text{CDCl}_3$ )  $\delta$  7.55 (d,  $J = 7.8$  Hz, 1H), 7.39 (dd,  $J = 7.6, 7.6$  Hz, 1H), 7.33 – 7.16 (m, 7H), 5.79 (d,  $J = 1.3$  Hz, 1H), 5.20 (d,  $J = 1.4$  Hz, 1H), 4.63 – 4.47 (m, 1H), 1.66 – 1.55 (m, 2H), 1.53 – 1.45 (m, 1H), 1.29 – 1.09 (m, 3H), 1.09 – 0.99 (m, 1H), 0.79 (t,  $J = 7.2$  Hz, 3H).

$^{13}\text{C}$  NMR (125 MHz,  $\text{CDCl}_3$ )  $\delta$  148.7, 143.0, 141.0, 140.1, 130.3, 128.6, 128.3, 128.0, 127.4, 126.5, 125.9, 115.8, 70.7, 38.1, 28.3, 22.5, 14.1.

HRMS ( $\text{CI}^+$ )  $m/z$  266.1674 [ $(\text{M})^+$ ; calcd for  $\text{C}_{19}\text{H}_{22}\text{O}$  266.1671].

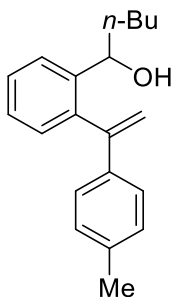

**1-(2-(1-(P-tolyl)vinyl)phenyl)pentan-1-ol (16c).**

Pale-yellow oil (condition a: 50 mg, 73%; condition b: 54 mg, 78%).

IR (neat) 3390 (br), 2929, 2858, 1510, 1447, 1040, 900, 827, 759  $\text{cm}^{-1}$ .

$^1\text{H}$  NMR (500 MHz,  $\text{CDCl}_3$ )  $\delta$  7.57 (d,  $J = 7.8$  Hz, 1H), 7.40 (dd,  $J = 7.6, 7.6$  Hz, 1H), 7.30 (ddd,  $J = 7.5, 7.5, 1.4$  Hz, 1H), 7.22 (dd,  $J = 7.5, 1.5$  Hz, 1H), 7.19 – 7.15 (m, 2H), 7.10 (d,  $J = 8.1$  Hz, 2H), 5.77 (d,  $J = 1.5$  Hz, 1H), 5.16 (d,  $J = 1.5$  Hz, 1H), 4.63 (dd,  $J = 8.2, 4.9$  Hz, 1H), 2.34 (s, 3H), 1.73 – 1.59 (m, 2H), 1.58 – 1.47 (m, 1H), 1.29 – 1.23 (m, 1H), 1.23 – 1.21 (m, 2H), 1.11 – 1.03 (m, 1H), 0.80 (t,  $J = 7.2$  Hz, 3H).

$^{13}\text{C}$  NMR (125 MHz,  $\text{CDCl}_3$ )  $\delta$  148.5, 143.0, 140.3, 138.2, 137.9, 130.3, 129.3, 128.2, 127.3, 126.4, 125.9, 114.9, 70.7, 38.0, 28.3, 22.5, 21.2, 14.0.

HRMS ( $\text{CI}^+$ )  $m/z$  263.1794 [(M-OH) $^+$ ; calcd for  $\text{C}_{20}\text{H}_{23}$  263.1800].

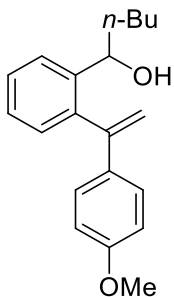

### 1-(2-(1-(4-Methoxyphenyl)vinyl)phenyl)pentan-1-ol (16d).

Pale-yellow oil (condition a: 52 mg, 72%; condition b: 55 mg; 76%).

IR (neat) 3420 (br), 2954, 2931, 1607, 1510, 1249, 1180, 1035, 837, 761  $\text{cm}^{-1}$ .

$^1\text{H}$  NMR (500 MHz,  $\text{CDCl}_3$ )  $\delta$  7.56 (d,  $J = 7.8$  Hz, 1H), 7.39 (dd,  $J = 7.6, 7.6$  Hz, 1H), 7.30 (ddd,  $J = 7.4, 7.4, 1.4$  Hz, 1H), 7.23 – 7.17 (m, 3H), 6.86 – 6.76 (m, 2H), 5.71 (d,  $J = 1.4$  Hz, 1H), 5.10 (d,  $J = 1.3$  Hz, 1H), 4.63 (dt,  $J = 8.4, 4.4$  Hz, 1H), 3.79 (s, 3H), 1.68 – 1.61 (m, 1H), 1.55 – 1.49 (m, 2H), 1.29 – 1.13 (m, 3H), 1.12 – 1.04 (m, 1H), 0.79 (t,  $J = 7.2$  Hz, 3H).

$^{13}\text{C}$  NMR (125 MHz,  $\text{CDCl}_3$ )  $\delta$  159.6, 148.0, 143.0, 140.4, 133.7, 130.2, 128.2, 127.8, 127.4, 125.9, 113.93, 113.86, 70.7, 55.4, 38.1, 28.3, 22.5, 14.1.

HRMS ( $\text{CI}^+$ )  $m/z$  279.1736 [(M-OH) $^+$ ; calcd for  $\text{C}_{20}\text{H}_{23}\text{O}$  279.1749].

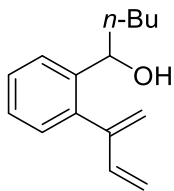

**1-(2-(Buta-1,3-dien-2-yl)phenyl)pentan-1-ol (16e).**

Three equivalents of vinyl bromide were added for optimal yield. Pale-yellow oil (condition a: 40 mg, 75%; condition b: 42 mg; 78%).

IR (neat) 3403 (br), 2955, 2930, 2870, 1749, 1466, 1379, 999, 761  $\text{cm}^{-1}$ .

$^1\text{H}$  NMR (500 MHz,  $\text{CDCl}_3$ )  $\delta$  7.55 (dd,  $J = 7.8, 1.4$  Hz, 1H), 7.36 (ddd,  $J = 7.6, 7.6, 1.5$  Hz, 1H), 7.28-7.24 (m, 1H), 7.07 (dd,  $J = 7.5, 1.5$  Hz, 1H), 6.67 (dd,  $J = 17.3, 10.4$  Hz, 1H), 5.43 (dd,  $J = 2.0, 0.8$  Hz, 1H), 5.16 (d,  $J = 10.6$  Hz, 1H), 5.09 (s, 1H), 4.77 – 4.68 (m, 2H), 1.80 – 1.70 (m, 1H), 1.69 – 1.61 (m, 2H), 1.4-1.18 (m, 4H), 0.86 (t,  $J = 7.1$  Hz, 3H).

$^{13}\text{C}$  NMR (125 MHz,  $\text{CDCl}_3$ )  $\delta$  147.6, 142.9, 140.0, 137.8, 129.8, 128.1, 127.2, 125.6, 119.3, 117.6, 70.8, 38.3, 28.4, 22.7, 14.1.

HRMS ( $\text{ES}^+$ )  $m/z$  199.1493 [(M-OH) $^+$ ; calcd for  $\text{C}_{15}\text{H}_{19}$  199.1487].

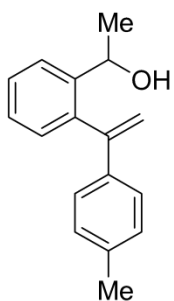

**1-(2-(1-(P-tolyl)vinyl)phenyl)ethan-1-ol (16f).**

Pale-yellow oil (condition a: 41 mg, 70%; condition b: 40 mg, 69%).

IR (neat) 3367(br), 2971, 1616, 1510, 1446, 1118, 1068, 1003, 900, 827, 761  $\text{cm}^{-1}$ .

$^1\text{H}$  NMR (500 MHz,  $\text{CDCl}_3$ )  $\delta$  7.62 (d,  $J = 7.8$  Hz, 1H), 7.41 (dd,  $J = 7.6, 7.6$  Hz, 1H), 7.31 (dd,  $J = 7.4, 7.4$  Hz, 1H), 7.21 (d,  $J = 7.7$  Hz, 1H), 7.17 (d,  $J = 7.7$  Hz, 2H), 7.10 (d,  $J = 7.4$  Hz, 2H), 5.79 (s, 1H), 5.17 (s, 1H), 4.85 (q,  $J = 6.5$  Hz, 1H), 2.34 (s, 3H), 1.77 –

1.55 (m, 1H), 1.30 (d,  $J = 6.4$  Hz, 3H).

$^{13}\text{C}$  NMR (125 MHz,  $\text{CDCl}_3$ )  $\delta$  148.3, 143.8, 139.9, 138.01, 137.96, 130.2, 129.3, 128.3, 127.4, 126.4, 125.4, 114.8, 66.8, 24.4, 21.3.

HRMS ( $\text{CI}^+$ )  $m/z$  221.1326 [(M-OH) $^+$ ]; calcd for  $\text{C}_{17}\text{H}_{17}$  221.1330].

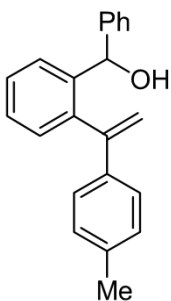

**Phenyl(2-(1-(p-tolyl)vinyl)phenyl)ethanol (16g).**

Pale-yellow oil (condition a: 46 mg, 63%; condition b: 42 mg, 57%;).

IR (neat) 3414 (br), 3026, 1510, 1447, 1183, 1017, 903, 827, 761, 736, 700  $\text{cm}^{-1}$ .

$^1\text{H}$  NMR (500 MHz,  $\text{CDCl}_3$ )  $\delta$  7.46 (dd,  $J = 7.7, 1.5$  Hz, 1H), 7.36 (ddd,  $J = 7.5, 7.5, 1.6$  Hz, 1H), 7.31 (ddd,  $J = 7.4, 7.4, 1.5$  Hz, 1H), 7.27 – 7.17 (m, 8H), 7.11 (d,  $J = 8.0$  Hz, 2H), 5.84 (d,  $J = 3.6$  Hz, 1H), 5.79 (d,  $J = 1.3$  Hz, 1H), 5.13 (d,  $J = 1.3$  Hz, 1H), 2.35 (s, 3H), 1.95 (d,  $J = 3.6$  Hz, 1H).

$^{13}\text{C}$  NMR (125 MHz,  $\text{CDCl}_3$ )  $\delta$  148.1, 143.7, 141.9, 140.9, 138.1, 138.0, 130.4, 129.4, 128.3, 128.2, 127.7, 127.6, 127.2, 126.6, 115.4, 72.4, 21.3.

HRMS ( $\text{CI}^+$ )  $m/z$  283.1487 [(M-OH) $^+$ ]; calcd for  $\text{C}_{22}\text{H}_{19}$  283.1487].

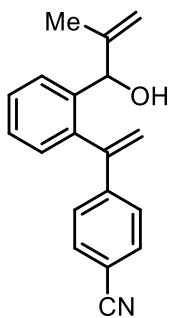

4-(1-(2-(1-Hydroxy-2-methylallyl)phenyl)vinyl)benzonitrile (**16h**)

To a solution of 2-bromopropene (24  $\mu$ L, 0.27 mmol) in THF (0.5 mL) was added dropwise *t*-BuLi (370  $\mu$ L, 1.48 M in hexanes, 0.55 mmol) at -78 °C. The reaction mixture was stirred for 30 minutes, followed by the addition of linchpin **14** (50 mg, 0.245 mmol) in THF (0.2 mL). After 30 minutes, the reaction mixture was transferred to a suspension of CuBr-DMS (98 mg, 0.48 mmol) in HMPA (0.5 mL) via cannula at room temperature, followed by the addition of *t*-BuOK (240  $\mu$ L, 1 M in THF). The resulting suspension was stirred at room temperature for 30 minutes, followed by the addition of a pre-mixed solution of 4-iodobenzonitrile (110 mg, 0.48 mmol) and Pd(PPh<sub>3</sub>)<sub>4</sub> (14 mg, 12  $\mu$ mol) in THF (0.5 mL). The resulting reaction mixture was stirred overnight, followed by the addition of 1 N HCl (1 mL). After 10 minutes, the reaction mixture was diluted with H<sub>2</sub>O (5 mL) and extracted with Et<sub>2</sub>O (3 $\times$ 5 mL). The combined organic layers were washed with brine (15 mL), dried over anhydrous Na<sub>2</sub>SO<sub>4</sub>, filtered and concentrated. Flash chromatography (1:10 EtOAc/toluene) afforded compound **16h** (46 mg, 69%) as a pale-yellow oil.

IR (neat) 3446 (br), 3061, 2227, 1604, 1402, 1046, 906, 849,764 cm<sup>-1</sup>.

<sup>1</sup>H NMR (500 MHz, CDCl<sub>3</sub>)  $\delta$  7.58 (d, *J* = 7.6 Hz, 2H), 7.52 (d, *J* = 7.2 Hz, 1H), 7.45 – 7.37 (m, 3H), 7.34 (td, *J* = 7.5, 1.4 Hz, 1H), 7.19 (d, *J* = 7.6 Hz, 1H), 5.95 (s, 1H), 5.42 (s, 1H), 5.06 (s, 1H), 5.00 (d, *J* = 3.9 Hz, 1H), 4.90 (s, 1H), 1.65 (d, *J* = 4.1 Hz, 1H), 1.47 (s, 3H).

<sup>13</sup>C NMR (125 MHz, CDCl<sub>3</sub>)  $\delta$  146.8, 146.3, 145.2, 139.9, 139.7, 132.4, 130.4, 128.8, 128.1, 127.3, 127.1, 119.1, 118.9, 111.5, 111.3, 73.7, 19.4.

HRMS (ES<sup>+</sup>) *m/z* 258.1293 [(M-OH)<sup>+</sup>; calcd for C<sub>19</sub>H<sub>16</sub>N 258.1283].

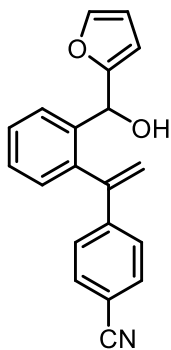

4-(1-(2-(Furan-2-yl(hydroxy)methyl)phenyl)vinyl)benzonitrile (**16i**)

To a solution of furan (20  $\mu$ L, 0.27 mmol) in THF (0.5 mL) was added dropwise *n*-BuLi (110  $\mu$ L, 2.5 M in hexanes, 0.27 mmol) at  $-78$   $^{\circ}$ C. After addition, the reaction mixture was warmed up to  $0$   $^{\circ}$ C and stirred for another hour. The resulting solution was then cooling down to  $-78$   $^{\circ}$ C, followed by the addition of linchpin **14** (50 mg, 0.245 mmol) in THF (0.2 mL). After 30 minutes, the reaction mixture was transferred to a suspension of CuBr·DMS (98 mg, 0.48 mmol) in HMPA (0.5 mL) via cannula at room temperature. After addition of *t*-BuOK (240  $\mu$ L, 1 M in THF), the resulting suspension was heated to  $60$   $^{\circ}$ C and stirred for another 45 minutes. The resulting mixture was then cooled down to room temperature, followed by the addition of a pre-mixed solution of 4-iodobenzonitrile (110 mg, 0.48 mmol) and Pd(PPh<sub>3</sub>)<sub>4</sub> (14 mg, 12  $\mu$ mol) in THF (0.5 mL). The resulting reaction mixture was stirred overnight, followed by the addition of 1 N HCl (1 mL). After 10 minutes, the reaction mixture was diluted with H<sub>2</sub>O (5 mL) and extracted with Et<sub>2</sub>O (3 $\times$ 5 mL). The combined organic layers were washed with brine (15 mL), dried over anhydrous Na<sub>2</sub>SO<sub>4</sub>, filtered and concentrated. Flash chromatography (1:10 EtOAc/hexanes) afforded compound **16i** (41 mg, 57%) as brown solid.

Note: The tri-component adduct **16i** should be quickly isolated and purified due to its instability.

IR (neat) 3446 (br), 3074, 2227, 1604, 1503, 1404, 1149, 1011, 924, 848, 740  $\text{cm}^{-1}$ .

<sup>1</sup>H NMR (500 MHz, CDCl<sub>3</sub>)  $\delta$  7.75 (d,  $J$  = 7.9 Hz, 1H), 7.54 – 7.50 (m, 2H), 7.47 (dd,  $J$  = 7.8, 7.6 Hz, 1H), 7.38 (dd,  $J$  = 8.7, 7.5 Hz, 1H), 7.31 (d,  $J$  = 8.6 Hz, 2H), 7.28 – 7.27

(m, 1H), 7.19 (dd,  $J = 7.6, 1.5$  Hz, 1H), 6.26 – 6.19 (m, 1H), 5.93 – 5.86 (m, 2H), 5.72 (d,  $J = 4.1$  Hz, 1H), 5.32 (s, 1H), 2.15 (d,  $J = 4.1$  Hz, 1H).

$^{13}\text{C}$  NMR (125 MHz,  $\text{CDCl}_3$ )  $\delta$  155.6, 146.4, 144.7, 142.4, 139.0, 138.9, 132.3, 130.2, 128.7, 128.4, 127.5, 127.3, 119.2, 118.9, 111.4, 110.3, 108.0, 67.0.

HRMS ( $\text{ES}^-$ )  $m/z$  300.1033 [(M-H) $^-$ ]; calcd for  $\text{C}_{20}\text{H}_{14}\text{NO}$  300.1025].

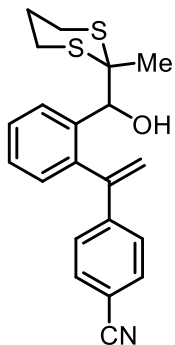

#### 4-(1-(2-(Hydroxy(2-methyl-1,3-dithian-2-yl)methyl)phenyl)vinyl)benzonitrile (**16j**)

To a solution of 2-methyl-1,3-dithiane (33  $\mu\text{L}$ , 0.27 mmol) in THF (0.5 mL) was added dropwise *n*-BuLi (110  $\mu\text{L}$ , 2.5 M in hexanes, 0.27 mmol) at room temperature. The reaction mixture was stirred for another 10 minutes before cooling down to 0  $^\circ\text{C}$ , followed by the addition of linchpin **14** (50 mg, 0.245 mmol) in THF (0.2 mL). The resulting solution was then warmed up to room temperature and stirred for another 30 minutes before it was transferred to a suspension of CuBr·DMS (98 mg, 0.48 mmol) in HMPA (0.5 mL) via cannula at room temperature. *t*-BuOK (240  $\mu\text{L}$ , 1 M in THF) was then added. The resulting mixture was stirred for 30 min, followed by the addition of a pre-mixed solution of 4-iodobenzonitrile (110 mg, 0.48 mmol) and  $\text{Pd}(\text{PPh}_3)_4$  (14 mg, 12  $\mu\text{mol}$ ) in THF (0.5 mL). The resulting reaction mixture was stirred overnight, followed by the addition of 1 N HCl (2 mL). After 1 hour, the reaction mixture was diluted with  $\text{H}_2\text{O}$  (5 mL) and extracted with  $\text{Et}_2\text{O}$  (3 $\times$ 5 mL). The combined organic layers were washed with brine (15 mL), dried over anhydrous  $\text{Na}_2\text{SO}_4$ , filtered and concentrated. Flash chromatography (1:15 EtOAc/toluene) afforded compound **16j** (48 mg, 53%) as a pale-yellow solid.

IR (neat) 3467 (br), 3061, 2923, 2226, 1603, 1374, 1027, 911, 849, 762  $\text{cm}^{-1}$ .

$^1\text{H}$  NMR (500 MHz,  $\text{CDCl}_3$ )  $\delta$  7.75 (d,  $J = 7.8$  Hz, 1H), 7.60 (d,  $J = 8.1$  Hz, 2H), 7.49 (d,  $J = 8.2$  Hz, 2H), 7.42 – 7.31 (m, 2H), 7.17 (d,  $J = 7.7$  Hz, 1H), 6.04 (s, 1H), 5.56 (s, 1H), 4.95 (s, 1H), 2.97 (s, 1H), 2.89 (t,  $J = 12.8$  Hz, 1H), 2.71 (dd,  $J = 14.2, 13.1$  Hz, 1H), 2.62 – 2.51 (m, 1H), 2.48 – 2.38 (m, 1H), 2.03 – 1.94 (m, 1H), 1.88 – 1.74 (m, 1H), 1.45 (s, 3H).

$^{13}\text{C}$  NMR (125 MHz,  $\text{CDCl}_3$ )  $\delta$  147.5, 144.8, 141.2, 136.8, 132.4, 130.7, 129.1, 128.3, 127.6, 127.2, 119.6, 118.9, 111.6, 71.7, 54.7, 28.0, 26.1, 24.3, 23.8.

HRMS ( $\text{ES}^+$ )  $m/z$  368.1155 [(M+H) $^+$ ]; calcd for  $\text{C}_{21}\text{H}_{22}\text{NOS}_2$  368.1143].

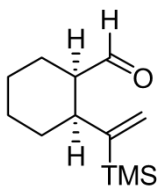

(19)

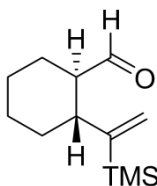

(20)

Synthesis of cyclohexyl linchpin **19** and **20**.

To a vigorously stirred suspension of magnesium turnings (2.11 g, 87.9 mmol) in THF (9 mL) was added a few drops of (1-bromovinyl)trimethylsilane (8.74 g, 48.8 mmol) solution in THF (9 mL), followed by the addition of a few iodine crystals. After the reaction was initiated, another 9 mL THF was added, followed by the addition of the remaining (1-bromovinyl)trimethylsilane solution. The reaction mixture was stirred under reflux for another hour. After cooling to room temperature, the freshly prepared Grignard reagent was diluted with 9 mL THF and slowly cannulated into a suspension of  $\text{CuBr}\cdot\text{DMS}$  (3.40 g, 16.5 mmol) in THF (20 mL) and dimethyl sulfide (20 mL) at  $-50$   $^\circ\text{C}$ , followed by the addition of HMPA (17 mL, 97.7 mmol). To this mixture was then added dropwise a THF (20 mL) solution of cyclohex-1-ene-1-carbaldehyde (3.54 g, 32.1 mmol) and  $\text{TMSCl}$  (8.3 mL, 65.4 mmol). The resulting mixture was stirred for 1h before addition of 1 N HCl (40 mL). After warming up to room temperature, the reaction



mixture was extracted with Et<sub>2</sub>O (3×50 mL) and the combined organic layer was washed with brine, dried over anhydrous Na<sub>2</sub>SO<sub>4</sub> and concentrated. The crude residue was purified by column chromatography with silica gel (1:4 CH<sub>2</sub>Cl<sub>2</sub>/hexanes to 100% CH<sub>2</sub>Cl<sub>2</sub>) to yield both *cis*-linchpin and *trans*-linchpin as colorless oils (*cis:trans* 1:1, 4.25 g, 63%). Note: Both linchpins can be easily oxidized to the corresponding acids. Samples are stored under N<sub>2</sub> atmosphere in a freezer (−20 °C) unless they are used immediately.

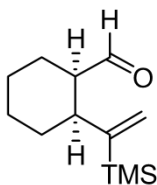

***Cis*-2-(1-(trimethylsilyl)vinyl)cyclohexane-1-carbaldehyde (19).**

Colorless oil.

IR (neat) 3054, 2934, 2857, 2740, 1718, 1449, 1249, 927, 837, 758 cm<sup>-1</sup>.

<sup>1</sup>H NMR (500 MHz, CDCl<sub>3</sub>) δ 9.76 (d, *J* = 1.1 Hz, 1H), 5.64 (dd, *J* = 2.2, 1.7 Hz, 1H), 5.56 (dd, *J* = 2.0, 1.1 Hz, 1H), 2.64 – 2.53 (m, 2H), 2.22 – 2.08 (m, 1H), 1.85 – 1.80 (m, 1H), 1.75 – 1.70 (m, 1H), 1.64 – 1.57 (m, 1H), 1.56 – 1.51 (m, 1H), 1.51 – 1.45 (m, 1H), 1.40 – 1.32 (m, 2H), 0.12 (s, 9H).

<sup>13</sup>C NMR (125 MHz, CDCl<sub>3</sub>) δ 207.1, 153.6, 125.2, 49.1, 43.0, 28.2, 27.0, 26.1, 22.6, - 0.7.

HRMS (CI<sup>+</sup>) *m/z* 195.1197 [(M-CH<sub>3</sub>)<sup>+</sup>; calcd for C<sub>11</sub>H<sub>19</sub>OSi 195.1205].

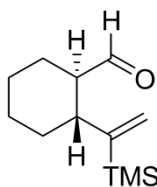

***Trans*-2-(1-(trimethylsilyl)vinyl)cyclohexane-1-carbaldehyde (20).**

Colorless oil.

IR (neat) 2931, 2855, 2707, 1726, 1447, 1249, 929, 838, 759, 690 cm<sup>-1</sup>.

<sup>1</sup>H NMR (500 MHz, CDCl<sub>3</sub>) δ 9.44 (d, *J* = 3.5 Hz, 1H), 5.70 – 5.63 (m, 1H), 5.46. (d, *J* =

1.9 Hz, 1H), 2.59 – 2.43 (m, 1H), 2.30 (ddd,  $J = 12.6, 11.7, 3.3$  Hz, 1 H), 1.89 – 1.73 (m, 4H), 1.37 – 1.21 (m, 3H), 1.17 – 1.08 (m, 1H), 0.10 (s, 9H).

$^{13}\text{C}$  NMR (125 MHz,  $\text{CDCl}_3$ )  $\delta$  205.4, 154.9, 125.4, 54.3, 43.7, 34.5, 26.9, 26.4, 25.0, -1.1.

HRMS ( $\text{ES}^+$ )  $m/z$  195.1206 [(M- $\text{CH}_3$ ) $^+$ ; calcd for  $\text{C}_{11}\text{H}_{19}\text{OSi}$  195.1205].

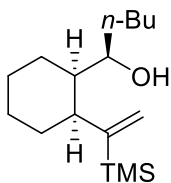

### Intermediate 21.

To a solution of linchpin **19** (50 mg, 0.24 mmol) in freshly degassed THF (0.5 mL, freeze-pump-thaw three cycles) at  $-78$  °C was added  $n\text{-BuLi}$  (110  $\mu\text{L}$ , 2.4 M, 0.26 mmol). After stirring for 30 min, the reaction mixture was quenched with  $\text{H}_2\text{O}$  (5 mL) and extracted with  $\text{Et}_2\text{O}$  (3 $\times$ 5 mL). The combined organic layers were washed with brine (15 mL), dried over anhydrous  $\text{Na}_2\text{SO}_4$ , filtered and concentrated. The resulting crude residue was purified by flash chromatography (1:20  $\text{EtOAc}$ /hexanes) to give intermediate **21**.

Colorless oil (55 mg, 86%).

IR (neat) 3375 (br), 2929, 2856, 1450, 1408, 1248, 925, 856, 836, 756, 687  $\text{cm}^{-1}$ .

$^1\text{H}$  NMR (500 MHz,  $\text{CDCl}_3$ )  $\delta$  5.86 (s, 1H), 5.56 (d,  $J = 2.3$  Hz, 1H), 3.73 – 3.66 (m, 1H), 2.63 – 2.47 (m, 1H), 1.89 – 1.79 (m, 1H), 1.79 – 1.69 (m, 2H), 1.67 – 1.55 (m, 3H), 1.49 – 1.18 (m, 10H), 0.89 (t,  $J = 7.1$  Hz, 3H), 0.09 (s, 9H).

$^{13}\text{C}$  NMR (125 MHz,  $\text{CDCl}_3$ )  $\delta$  155.9, 125.7, 73.7, 44.1, 42.2, 35.7, 29.6, 28.5, 25.4, 24.9, 23.3, 22.9, 14.3, -0.9.

HRMS ( $\text{CI}^+$ )  $m/z$  253.1988 [(M- $\text{CH}_3$ ) $^+$ ; calcd for  $\text{C}_{15}\text{H}_{29}\text{OSi}$  253.1988].

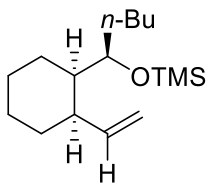

### Intermediate 22.

To a solution of linchpin **19** (50 mg, 0.24 mmol) in freshly degassed THF (0.5 mL, freeze-pump-thaw three cycles) at  $-78\text{ }^{\circ}\text{C}$  was added *n*-BuLi (110  $\mu\text{L}$ , 2.4 M, 0.26 mmol). After stirring for 30 min, the resulting solution was transferred to a suspension of CuBr·DMS (98 mg, 0.48 mmol) in freshly distilled HMPA (0.5 mL) via cannula at room temperature, followed by the addition of *t*-BuOK (240  $\mu\text{L}$ , 1 M in THF). The resulting mixture was stirred at  $60\text{ }^{\circ}\text{C}$  for 45 min. The reaction mixture was then quenched with a saturated aqueous solution of  $\text{NaHCO}_3$  (5 mL) and extracted with  $\text{Et}_2\text{O}$  (3 $\times$ 5 mL). The combined organic layers were washed with brine (15 mL), dried over anhydrous  $\text{Na}_2\text{SO}_4$ , filtered and concentrated. The resulting crude residue was purified by flash chromatography (hexanes to 1:33 EtOAc/hexanes, buffered with 5%  $\text{Et}_3\text{N}$ ) to give intermediate **22**.

Colorless oil (47 mg, 73%).

IR (neat) 3073, 2927, 2860, 1450, 1250, 1105, 1064, 953, 912, 839, 750, 684  $\text{cm}^{-1}$ .

$^1\text{H}$  NMR (500 MHz,  $\text{CDCl}_3$ )  $\delta$  6.11 – 6.01 (m, 1H), 5.03 (s, 1H), 5.02 – 4.98 (m, 1H), 3.39 – 3.32 (m, 1H), 2.44 – 2.35 (m, 1H), 1.81 (t,  $J = 14.6\text{ Hz}$ , 2H), 1.65 (d,  $J = 13.0\text{ Hz}$ , 1H), 1.49 – 1.37 (m, 5H), 1.33 – 1.17 (m, 6H), 1.16 – 1.06 (m, 1H), 0.89 (t,  $J = 6.9\text{ Hz}$ , 3H), 0.09 (s, 9H)

$^{13}\text{C}$  NMR (125 MHz,  $\text{CDCl}_3$ )  $\delta$  138.8, 115.5, 75.0, 45.2, 40.7, 34.0, 33.4, 26.6, 26.4, 24.9, 23.2, 21.3, 14.3, 0.8.

HRMS ( $\text{CI}^+$ )  $m/z$  268.2215 [ $(\text{M})^+$ ; calcd for  $\text{C}_{16}\text{H}_{32}\text{OSi}$  268.2222].

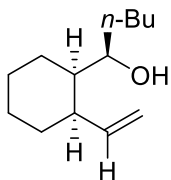

### Byproduct 23.

IR (neat) 3343 (br), 3072, 2925, 2859, 1450, 1129, 1041, 996, 912  $\text{cm}^{-1}$ .

$^1\text{H}$  NMR (500 MHz,  $\text{CDCl}_3$ )  $\delta$  6.21 (ddd,  $J = 16.7, 10.2, 9.9$  Hz, 1H), 5.11 (dd,  $J = 17.2, 2.3$  Hz, 1H), 5.05 (dd,  $J = 10.2, 2.3$  Hz, 1H), 3.45 – 3.38 (m, 1H), 2.48 – 2.41 (m, 1H), 1.84 (d,  $J = 12.6$  Hz, 1H), 1.77 (d,  $J = 13.1$  Hz, 1H), 1.65 (d,  $J = 13.2$  Hz, 1H), 1.63 – 1.57 (m, 1H), 1.54 – 1.25 (m, 11H), 0.90 (t,  $J = 7.0$  Hz, 3H).

$^{13}\text{C}$  NMR (125 MHz,  $\text{CDCl}_3$ )  $\delta$  139.7, 115.8, 74.9, 46.7, 42.8, 34.0, 33.6, 28.0, 26.6, 22.9, 22.7, 21.4, 14.3.

HRMS ( $\text{CI}^+$ )  $m/z$  196.1819 [ $(\text{M})^+$ ; calcd for  $\text{C}_{13}\text{H}_{24}\text{O}$  196.1827].

Three-component coupling of linchpin **19** via ARC/alkylation. Example:

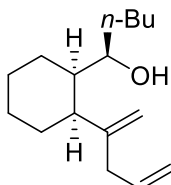

### Adduct 24a.

General procedures.

**Condition a:** To a solution of linchpin **19** (50 mg, 0.24 mmol) in freshly degassed THF (0.5 mL, three freeze-pump-thaw cycles) at  $-78$   $^{\circ}\text{C}$  was added  $n\text{-BuLi}$  (200  $\mu\text{L}$ , 2.4 M, 0.48 mmol). After stirring for 30 min, the resulting solution was transferred to a suspension of  $\text{CuBr}\cdot\text{DMS}$  (98 mg, 0.48 mmol) in freshly distilled HMPA/THF (1 mL, 1:1) via cannula at room temperature. The resulting mixture was stirred at  $60$   $^{\circ}\text{C}$  for 45 min, followed by the addition of allyl bromide (41  $\mu\text{L}$ , 0.48 mmol). The resulting mixture was stirred for 2 h before addition of 1 N HCl (1 mL). After 10 minutes, the reaction mixture was diluted with  $\text{H}_2\text{O}$  (5 mL) and extracted with  $\text{Et}_2\text{O}$  ( $3\times 5$  mL). The combined organic

layers were washed with brine (15 mL), dried over anhydrous Na<sub>2</sub>SO<sub>4</sub>, filtered and concentrated. The resulting crude residue was purified by flash chromatography (1:20 EtOAc /hexanes) to give compound **24a**.

**Condition b:** To a solution of linchpin **19** (50 mg, 0.24 mmol) in freshly degassed THF (0.5 mL, three freeze-pump-thaw cycles) at -78 °C was added *n*-BuLi (110 µL, 0.26 mmol). After stirring for 30 min, the resulting solution was transferred to a suspension of CuBr·DMS (98 mg, 0.48 mmol) in freshly distilled HMPA (0.5 mL) via cannula at room temperature, followed by the addition of *t*-BuOK (240 µL, 1 M in THF). The resulting mixture was stirred at 60 °C for 45 min, followed by the addition of allyl bromide (41 µL, 0.48 mmol). The resulting mixture was stirred for 2 h before addition of 1 N HCl (1 mL). After 10 minutes, the reaction mixture was diluted with H<sub>2</sub>O (5 mL) and extracted with Et<sub>2</sub>O (3×5 mL). The combined organic layers were washed with brine (15 mL), dried over anhydrous Na<sub>2</sub>SO<sub>4</sub>, filtered and concentrated. The resulting crude residue was purified by flash chromatography (1:20 EtOAc /hexanes) to give compound **24a**.

Colorless oil (condition a: 35 mg, 63%; condition b: 35 mg, 63%).

IR (neat) 3365 (br), 3078, 2926, 2853, 1640, 1450, 1383, 996, 911, 894 cm<sup>-1</sup>.

<sup>1</sup>H NMR (500 MHz, CDCl<sub>3</sub>) δ 5.86 – 5.74 (m, 1H), 5.06 (t, *J* = 1.3 Hz, 1H), 5.05 – 5.02 (m, 1H), 4.94 (s, 1H), 4.93 (s, 1H), 3.72 – 3.67 (m, 1H), 2.77 (qd, *J* = 15.5, 7.0 Hz, 2H), 2.28 – 2.23 (m, 1H), 1.92 – 1.84 (m, 1H), 1.79 – 1.67 (m, 4H), 1.57 – 1.51 (m, 2H), 1.45 – 1.24 (m, 9H), 0.89 (t, *J* = 7.0 Hz, 3H).

<sup>13</sup>C NMR (125 MHz, CDCl<sub>3</sub>) δ 151.1, 136.7, 116.5, 111.6, 73.0, 43.8, 42.3, 41.9, 36.0, 28.6, 28.4, 25.7, 24.6, 24.4, 22.9, 14.2.

HRMS (ES<sup>+</sup>) *m/z* 237.2228 [(M+H)<sup>+</sup>; calcd for C<sub>16</sub>H<sub>29</sub>O 237.2218].

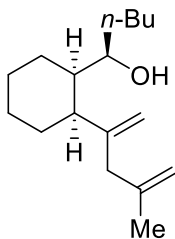

**Adduct 24b.**

Colorless oil (condition a: 32 mg, 54%; condition b: 40 mg, 67%).

IR (neat) 3365 (br), 3075, 2927, 2855, 1633, 1450, 1384, 1011, 892, 668  $\text{cm}^{-1}$ .

$^1\text{H}$  NMR (500 MHz,  $\text{CDCl}_3$ )  $\delta$  4.98 (s, 1H), 4.95 (s, 1H), 4.82 (s, 1H), 4.73 (s, 1H), 3.73 – 3.68 (m, 1H), 2.73 (s, 2H), 2.27 – 2.20 (m, 1H), 1.92 – 1.86 (m, 1H), 1.81 – 1.75 (m, 1H), 1.68 (s, 3H), 1.56 – 1.46 (m, 5H), 1.45 – 1.37 (m, 5H), 1.34 – 1.24 (m, 4H), 0.90 (t,  $J = 7.1$  Hz, 3H).

$^{13}\text{C}$  NMR (125 MHz,  $\text{CDCl}_3$ )  $\delta$  149.8, 143.8, 112.9, 112.4, 73.0, 46.5, 43.0, 42.0, 36.1, 28.7, 28.5, 25.7, 24.58, 24.55, 22.9, 22.0, 14.3.

HRMS ( $\text{CI}^+$ )  $m/z$  233.2261 [ $(\text{M}-\text{OH})^+$ ; calcd for  $\text{C}_{17}\text{H}_{29}$  233.2269].

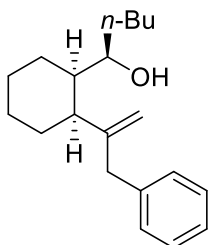

**Adduct 24c.**

Colorless oil (condition a: 45 mg, 66%; condition b: 48 mg, 71%).

IR (neat) 3366 (br), 3027, 2927, 2855, 1639, 1494, 1451, 895, 746, 700  $\text{cm}^{-1}$ .

$^1\text{H}$  NMR (500 MHz,  $\text{CDCl}_3$ )  $\delta$  7.27 (dd,  $J = 8.2, 7.3$  Hz, 2H), 7.21 (dd,  $J = 8.2, 7.3$  Hz, 1H), 7.16 (d,  $J = 7.3$  Hz, 2H), 5.01 (s, 1H), 4.87 (s, 1H), 3.76 – 3.64 (m, 1H), 3.37 (d,  $J = 15.0$  Hz, 1H), 3.30 (d,  $J = 15.0$  Hz, 1H), 2.24 – 2.19 (m, 1H), 1.90 – 1.83 (m, 1H), 1.81 – 1.74 (m, 1H), 1.70 – 1.66 (m, 2H), 1.55 – 1.46 (m, 3H), 1.40 – 1.23 (m, 9H), 0.89 (t,  $J = 7.0$  Hz, 3H).

$^{13}\text{C}$  NMR (125 MHz,  $\text{CDCl}_3$ )  $\delta$  151.9, 139.8, 129.3, 128.4, 126.3, 112.9, 73.0, 44.2, 43.1, 42.5, 36.0, 28.8, 28.5, 25.6, 24.6, 24.3, 22.8, 14.3.

HRMS ( $\text{ES}^+$ )  $m/z$  287.2368 [ $(\text{M}+\text{H})^+$ ; calcd for  $\text{C}_{20}\text{H}_{31}\text{O}$  287.2375].

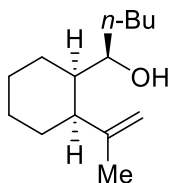

#### Adduct 24d.

Colorless oil (condition b: 33 mg, 65%).

IR(neat) 3371 (br), 2929, 2856, 1643, 1451, 1375, 1248, 1047, 1009, 888  $\text{cm}^{-1}$ .

$^1\text{H}$  NMR (500 MHz,  $\text{CDCl}_3$ )  $\delta$  4.86 (s, 1H), 4.82 (s, 1H), 3.77 – 3.60 (m, 1H), 2.22 (dt,  $J = 8.4, 4.6$  Hz, 1H), 1.91 – 1.80 (m, 1H), 1.77 (s, 3H), 1.75 – 1.63 (m, 4H), 1.60 – 1.52 (m, 2H), 1.47 – 1.36 (m, 6H), 1.35 – 1.24 (m, 3H), 0.89 (t,  $J = 7.0$  Hz, 3H).

$^{13}\text{C}$  NMR (125 MHz,  $\text{CDCl}_3$ )  $\delta$  149.0, 111.4, 73.1, 45.5, 42.6, 35.9, 28.7, 28.5, 25.6, 24.7, 24.48, 24.47, 22.9, 14.3.

HRMS ( $\text{ES}^+$ )  $m/z$  211.2065 [ $(\text{M}+\text{H})^+$ ; calcd for  $\text{C}_{14}\text{H}_{27}\text{O}$  211.2062].

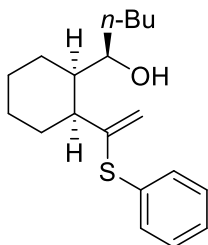

#### Adduct 24e.

Three equivalents of diphenyl disulfide were added for optimal yield. Pale-yellow oil. (condition a: 32 mg, 45%; condition b: 38 mg, 53%).

IR (neat) 3408 (br), 2928, 2856, 1709, 1583, 1447, 1378, 1082, 1022, 908, 747, 691  $\text{cm}^{-1}$ .

$^1\text{H}$  NMR (500 MHz,  $\text{CDCl}_3$ )  $\delta$  7.44 (d,  $J = 7.2$  Hz, 2H), 7.38 – 7.31 (m, 3H), 5.25 (s, 1H), 4.81 (s, 1H), 3.85 – 3.78 (m, 1H), 2.49 – 2.44 (m, 1H), 2.00 – 1.93 (m, 1H), 1.90 – 1.81

(m, 2H), 1.77 – 1.70 (m, 2H), 1.63 – 1.59 (m, 1H), 1.48 – 1.32 (m, 9H), 0.93 (t,  $J = 7.0$  Hz, 3H).

$^{13}\text{C}$  NMR (125 MHz,  $\text{CDCl}_3$ )  $\delta$  150.1, 134.3, 132.9, 129.4, 128.4, 111.6, 73.0, 45.2, 42.7, 36.2, 29.4, 28.5, 25.3, 24.5, 22.9, 14.3.

HRMS ( $\text{ES}^+$ )  $m/z$  327.1755 [ $(\text{M}+\text{Na})^+$ ; calcd for  $\text{C}_{19}\text{H}_{28}\text{OSNa}$  327.1759].

Three-component coupling of linchpin **19** via ARC/CCR.

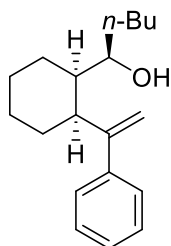

#### Adduct **25b**.

General procedures.

**Condition a:** To a solution of linchpin **19** (50 mg, 0.24 mmol) in freshly degassed THF (0.5 mL, three freeze-pump-thaw cycles) at  $-78$  °C was added  $n\text{-BuLi}$  (200  $\mu\text{L}$ , 2.4 M, 0.48 mmol). After stirring for 30 min, the resulting solution was transferred to a suspension of  $\text{CuBr}\cdot\text{DMS}$  (98 mg, 0.48 mmol) in freshly distilled HMPA/THF (1 mL, 1:1) via cannula at room temperature. The resulting mixture was stirred at 60 °C for 45 min before the addition of a pre-mixed solution of iodobenzene (98 mg, 0.48 mmol) and  $\text{Pd}(\text{PPh}_3)_4$  (14 mg, 12  $\mu\text{mol}$ ) in THF (0.5 mL). The resulting mixture was stirred overnight, followed by the addition of 1 N HCl (1 mL). After 10 minutes, the reaction mixture was diluted with  $\text{H}_2\text{O}$  (5 mL) and extracted with  $\text{Et}_2\text{O}$  (3 $\times$ 5 mL). The combined organic layers were washed with brine (15 mL), dried over anhydrous  $\text{Na}_2\text{SO}_4$ , filtered and concentrated. The resulting crude residue was purified by flash chromatography (1:20 EtOAc /hexanes) to give compound **25b**.

**Condition b:** To a solution of linchpin **19** (50 mg, 0.24 mmol) in freshly degassed THF (0.5 mL, three freeze-pump-thaw cycles) at  $-78$  °C was added  $n\text{-BuLi}$  (110  $\mu\text{L}$ , 0.26 mmol). After stirring for 30 min, the resulting solution was transferred to a suspension of



CuBr·DMS (98 mg, 0.48 mmol) in freshly distilled HMPA (0.5 mL) via cannula at room temperature, followed by the addition of *t*-BuOK (240  $\mu$ L, 1 M in THF). The resulting mixture was stirred at 60 °C for 45 min before the addition of a pre-mixed solution of iodobenzene (98 mg, 0.48 mmol) and Pd(PPh<sub>3</sub>)<sub>4</sub> (14 mg, 12  $\mu$ mol) in THF (0.5 mL). The resulting mixture was stirred overnight before the addition of 1 N HCl (1 mL). After 10 minutes, the reaction mixture was diluted with H<sub>2</sub>O (5 mL) and extracted with Et<sub>2</sub>O (3 $\times$ 5 mL). The combined organic layers were washed with brine (15 mL), dried over anhydrous Na<sub>2</sub>SO<sub>4</sub>, filtered and concentrated. The resulting crude residue was purified by flash chromatography (1:20 EtOAc/hexanes) to give compound **25b**.

Pale-yellow oil (condition a: 40 mg, 61%; condition b: 38 mg, 57%)

IR (neat) 3364 (br), 3078, 2928, 2856, 1640, 1450, 1383, 996, 912, 894, 745 cm<sup>-1</sup>.

<sup>1</sup>H NMR (500 MHz, CDCl<sub>3</sub>)  $\delta$  7.36 – 7.28 (m, 4H), 7.26 – 7.21 (m, 1H), 5.30 (s, 1H), 5.18 (s, 1H), 3.77 – 3.72 (m, 1H), 2.93 – 2.83 (m, 1H), 1.94 – 1.80 (m, 3H), 1.76 – 1.65 (m, 2H), 1.60 – 1.56 (m, 1H), 1.50 – 1.43 (m, 2H), 1.35 – 1.28 (m, 2H), 1.25 – 1.14 (m, 4H), 1.11 – 1.04 (m, 1H), 0.80 (t, *J* = 6.9 Hz, 3H).

<sup>13</sup>C NMR (125 MHz, CDCl<sub>3</sub>)  $\delta$  152.5, 143.2, 128.4, 127.4, 126.8, 113.4, 72.7, 43.4, 41.2, 36.1, 28.3, 28.2, 26.0, 25.3, 24.2, 22.7, 14.2.

HRMS (CI<sup>+</sup>) *m/z* 272.2133[(M+H)<sup>+</sup>; calcd for C<sub>19</sub>H<sub>28</sub>O 272.2140].

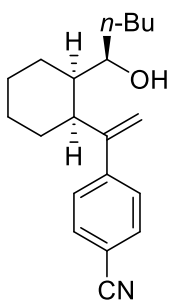

#### Adduct **25a**.

Following the general procedure, the reaction mixture is treated with 1N HCl to hydrolyze TMS silyl ether. Unfortunately, compound **25a** has very close polarity to

impurities. To simplify purification, before addition of 1N HCl, the reaction mixture was quenched with a saturated aqueous solution of NaHCO<sub>3</sub> (5 mL), filtered through Celite, rinsed and extracted with hexanes (3×5 mL). The combined organic layers were washed with brine (15 mL), dried over anhydrous Na<sub>2</sub>SO<sub>4</sub>, filtered and concentrated. The resulting crude residue was purified by flash chromatography (hexanes to 1:40 EtOAc/hexanes, buffered with 1% Et<sub>3</sub>N) to give TMS protected product, which was submitted into 1N HCl/THF (2 mL, 1:1). After 10 minutes, the reaction mixture was diluted with Et<sub>2</sub>O (5 mL) and extracted with Et<sub>2</sub>O (3×5 mL). The combined organic layers were washed with brine (15 mL), dried over anhydrous Na<sub>2</sub>SO<sub>4</sub>, filtered and concentrated to give the clean adduct **25 a**.

Pale-yellow oil (condition a: 35 mg, 49%; condition b: 38 mg, 53%).

IR (neat) 3433 (br), 2928, 2857, 2228, 1604, 1502, 1451, 1402, 1014, 907, 847, 745 cm<sup>-1</sup>.

<sup>1</sup>H NMR (500 MHz, CDCl<sub>3</sub>) δ 7.61 (d, *J* = 8.2 Hz, 2H), 7.43 (d, *J* = 8.0 Hz, 2H), 5.38 (s, 1H), 5.31 (s, 1H), 3.74 – 3.62 (m, 1H), 2.94 – 2.83 (m, 1H), 1.92 – 1.80 (m, 3H), 1.74 – 1.64 (m, 2H), 1.54 – 1.42 (m, 4H), 1.31 – 1.24 (m, 2H), 1.22 – 1.13 (m, 4H), 1.08 – 1.01 (m, 1H), 0.80 (t, *J* = 6.8 Hz, 3H).

<sup>13</sup>C NMR (125 MHz, CDCl<sub>3</sub>) δ 151.0, 147.8, 132.3, 127.5, 119.0, 116.0, 111.0, 72.5, 43.3, 41.0, 36.2, 28.2, 28.1, 26.0, 25.2, 24.0, 22.6, 14.1.

HRMS (ES<sup>-</sup>) *m/z* 296.2017 [(M-H)<sup>-</sup>; calcd for C<sub>20</sub>H<sub>26</sub>NO 296.2014].

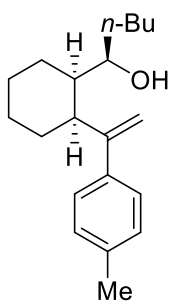

#### Adduct **25c**.

Pale-yellow oil (37 mg, 54%; 40 mg, 59%).

IR (neat) 3482 (br), 2929, 2857, 1622, 1511, 1451, 1079, 1017, 895, 823, 730  $\text{cm}^{-1}$ .

$^1\text{H}$  NMR (500 MHz,  $\text{CDCl}_3$ )  $\delta$  7.23 (d,  $J = 7.9$  Hz, 2H), 7.12 (d,  $J = 7.8$  Hz, 2H), 5.27 (s, 1H), 5.13 (s, 1H), 3.78 – 3.69 (m, 1H), 2.96 – 2.83 (m, 1H), 2.34 (s, 3H), 1.96 – 1.76 (m, 3H), 1.76 – 1.65 (m, 2H), 1.61 – 1.42 (m, 4H), 1.36 – 1.26 (m, 2H), 1.20 (dd,  $J = 11.2, 5.2$  Hz, 4H), 1.12 – 1.03 (m, 1H), 0.80 (t,  $J = 7.1$  Hz, 3H).

$^{13}\text{C}$  NMR (125 MHz,  $\text{CDCl}_3$ )  $\delta$  152.4, 140.2, 137.1, 129.1, 126.6, 112.7, 72.7, 43.4, 41.2, 36.1, 28.32, 28.28, 26.1, 25.3, 24.2, 22.7, 21.2, 14.2.

HRMS ( $\text{ES}^+$ )  $m/z$  287.2371 [(M+H) $^+$ ]; calcd for  $\text{C}_{20}\text{H}_{31}\text{O}$  287.2375].

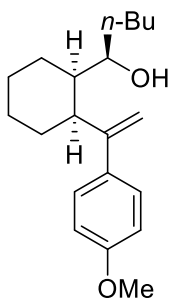

**Adduct 25d.** Pale-yellow oil (condition a: 40 mg, 55%; condition b: 45 mg, 62%).

**Adduct 25e.** Pale-yellow oil (condition b: 40 mg, 55%).

IR (neat) 3421 (br), 2928, 2855, 1608, 1510, 1463, 1246, 1178, 1036, 893, 835, 741  $\text{cm}^{-1}$ .

$^1\text{H}$  NMR (500 MHz,  $\text{CDCl}_3$ )  $\delta$  7.28 (d,  $J = 8.8$  Hz, 2H), 6.85 (d,  $J = 8.8$  Hz, 2H), 5.24 (s, 1H), 5.10 (s, 1H), 3.81 (s, 3H), 3.74 – 3.68 (m, 1H), 2.89 – 2.83 (m, 1H), 1.94 – 1.89 (m, 1H), 1.88 – 1.79 (m, 2H), 1.75 – 1.65 (m, 2H), 1.56 – 1.41 (m, 3H), 1.33 – 1.27 (m, 2H), 1.24 – 1.05 (m, 5H), 0.81 (t,  $J = 6.9$  Hz, 3H).

$^{13}\text{C}$  NMR (125 MHz,  $\text{CDCl}_3$ )  $\delta$  159.1, 151.9, 135.5, 127.8, 113.8, 112.1, 72.6, 55.4, 43.5, 41.1, 36.1, 28.3, 28.3, 26.1, 25.4, 24.2, 22.7, 14.2.

HRMS ( $\text{ES}^+$ )  $m/z$  303.2324[(M+H) $^+$ ]; calcd for  $\text{C}_{20}\text{H}_{31}\text{O}_2$  303.2324].

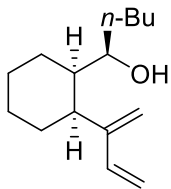

**Adduct 25f.**

Three equivalents of vinyl bromide were added for optimal yield. Pale-yellow oil (condition b: 36 mg, 68%).

IR (neat) 3359 (br), 3087, 2929, 2856, 1804, 1593, 1450, 990, 896  $\text{cm}^{-1}$ .

$^1\text{H}$  NMR (500 MHz,  $\text{CDCl}_3$ )  $\delta$  6.29 (dd,  $J = 17.6, 10.9$  Hz, 1H), 5.24 (d,  $J = 17.6$  Hz, 1H), 5.17 (s, 1H), 5.12 (s, 1H), 5.03 (d,  $J = 10.9$  Hz, 1H), 3.69 – 3.55 (m, 1H), 2.76 – 2.61 (m, 1H), 1.90 – 1.77 (m, 2H), 1.77 – 1.62 (m, 4H), 1.56 – 1.46 (m, 1H), 1.44 – 1.21 (m, 9H), 0.87 (t,  $J = 7.0$  Hz, 3H).

$^{13}\text{C}$  NMR (125 MHz,  $\text{CDCl}_3$ )  $\delta$  149.0, 140.1, 116.2, 112.9, 72.8, 42.4, 39.1, 36.1, 28.8, 28.2, 26.0, 24.6, 24.5, 22.8, 14.2.

HRMS ( $\text{CI}^+$ )  $m/z$  222.1982 [ $\text{M}^+$ ; calcd for  $\text{C}_{15}\text{H}_{26}\text{O}$  222.1984].

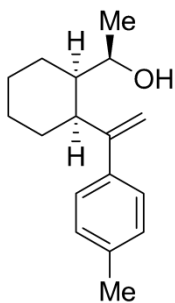

**Adduct 25g.**

Pale-yellow oil (condition a: 32 mg, 55%; condition b: 30 mg, 51%).

IR (neat) 3366 (br), 2926, 2853, 1622, 1511, 1449, 1384, 1089, 1065, 1040, 928, 895, 824  $\text{cm}^{-1}$ .

$^1\text{H}$  NMR (500 MHz,  $\text{CDCl}_3$ )  $\delta$  7.24 (d,  $J = 7.9$  Hz, 2H), 7.12 (d,  $J = 7.9$  Hz, 2H), 5.27 (s, 1H), 5.13 (s, 1H), 4.06 – 3.94 (m, 1H), 2.98 – 2.73 (m, 1H), 2.34 (s, 3H), 2.00 – 1.88 (m, 1H), 1.85 – 1.77 (m, 2H), 1.77 – 1.65 (m, 2H), 1.61 – 1.53 (m, 3H), 1.50 – 1.39 (m, 2H),

1.08 (d,  $J = 6.3$  Hz, 3H).

$^{13}\text{C}$  NMR (125 MHz,  $\text{CDCl}_3$ )  $\delta$  152.1, 140.3, 137.1, 129.1, 126.6, 112.9, 68.7, 43.7, 43.0, 28.3, 26.1, 24.9, 24.1, 23.0, 21.2.

HRMS ( $\text{ES}^+$ )  $m/z$  245.1905 $[(\text{M}+\text{H})^+]$ ; calcd for  $\text{C}_{17}\text{H}_{25}\text{O}$  245.1905].

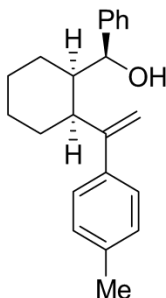

#### Adduct 25h.

Pale-yellow oil (condition a: 46 mg, 63%; condition b: 38 mg, 52%)

IR (neat) 3432 (br), 3027, 2927, 2853, 1623, 1511, 1450, 1384, 1019, 897, 826, 762, 732, 702  $\text{cm}^{-1}$ .

$^1\text{H}$  NMR (500 MHz,  $\text{CDCl}_3$ )  $\delta$  7.25 – 7.20 (m, 3H), 7.13 – 7.04 (m, 4H), 6.99 (d,  $J = 7.9$  Hz, 2H), 5.30 (s, 1H), 5.25 (s, 1H), 4.99 – 4.94 (m, 1H), 2.74 – 2.67 (m, 1H), 2.33 (s, 3H), 1.94 – 1.76 (m, 5H), 1.66 (d,  $J = 2.0$  Hz, 1H), 1.63 – 1.56 (m, 2H), 1.47 – 1.39 (m, 2H).

$^{13}\text{C}$  NMR (125 MHz,  $\text{CDCl}_3$ )  $\delta$  151.8, 144.9, 140.5, 137.0, 129.0, 128.2, 127.1, 126.8, 126.5, 113.4, 75.6, 44.0, 42.7, 28.5, 25.4, 24.7, 24.4, 21.2.

HRMS ( $\text{ES}^+$ )  $m/z$  307.2066  $[(\text{M}+\text{H})^+]$ ; calcd for  $\text{C}_{22}\text{H}_{27}\text{O}$  307.2062].

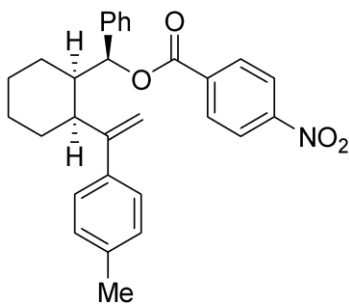

### Derivative 26.

To the three-component adduct **25h** (33 mg, 0.11 mmol) in pyridine (0.4 mL) was added 4-nitrobenzoyl chloride (23 mg, 0.12 mmol). The reaction mixture was stirred at room temperature for 2 hours before addition of 1N HCl (1 mL). The reaction mixture was extracted with hexanes (3×3 mL), washed with 1N HCl (2×3 mL), and brine (6 mL). The organic layers were dried over anhydrous Na<sub>2</sub>SO<sub>4</sub>, filtered and concentrated. The resulting crude residue was purified by flash chromatography (1:20 EtOAc/hexanes) to give compound **26**.

Colorless crystal (45 mg, 91%, m.p. 113-114 °C).

IR (neat) 2925, 1726, 1528, 1345, 1272, 1100, 826, 719 cm<sup>-1</sup>.

<sup>1</sup>H NMR (500 MHz, CDCl<sub>3</sub>) δ 8.32 (d, *J* = 8.9 Hz, 2H), 8.25 (d, *J* = 8.9 Hz, 2H), 7.26 – 7.21 (m, 3H), 7.14 – 7.06 (m, 4H), 7.00 (d, *J* = 7.8 Hz, 2H), 6.28 (d, *J* = 6.8 Hz, 1H), 5.30 (s, 1H), 5.14 (s, 1H), 2.80 – 2.73 (m, 1H), 2.35 (s, 3H), 2.31 – 2.26 (m, 1H), 1.94 – 1.80 (m, 3H), 1.73 – 1.65 (m, 1H), 1.64 – 1.56 (m, 3H), 1.51 – 1.45 (m, 1H).

<sup>13</sup>C NMR (125 MHz, CDCl<sub>3</sub>) δ 164.0, 150.7, 150.5, 140.1, 140.0, 137.2, 136.0, 130.8, 129.1, 128.5, 127.9, 126.8, 126.83, 123.81, 114.0, 79.2, 42.7, 41.8, 28.1, 25.7, 24.4, 24.0, 21.2.

HRMS (ES<sup>+</sup>) *m/z* 456.2178 [(M+H)<sup>+</sup>; calcd for C<sub>29</sub>H<sub>30</sub>NO<sub>4</sub> 456.2175].

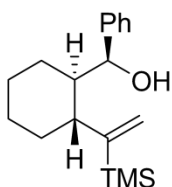

**Alcohol S2.** To a solution of *trans*-TMS linchpin **20** (30 mg, 0.14 mmol) in THF (0.4 mL) at –78 °C was added PhLi (94 μL, 0.16 mmol, 1.7 M in dibutyl ether) dropwise. After 30 min, the reaction mixture was quenched with H<sub>2</sub>O (2 mL), diluted with Et<sub>2</sub>O (2 mL) and extract with Et<sub>2</sub>O (3×3 mL). The organic layers were dried over anhydrous Na<sub>2</sub>SO<sub>4</sub>, filtered and concentrated. The resulting crude residue was purified by flash

chromatography (1:20 EtOAc /hexanes) to give compound **S2** as a colorless oil (34 mg, 85%).

IR (neat) 3417 (br), 2927, 2852, 1450, 1248, 1018, 924, 836, 758, 701  $\text{cm}^{-1}$ .

$^1\text{H}$  NMR (500 MHz,  $\text{C}_6\text{D}_6$ )  $\delta$  7.30 (d,  $J = 7.3$  Hz, 2H), 7.24 – 7.20 (m, 2H), 7.14 – 7.08 (m, 1H), 5.76 (d,  $J = 2.6$  Hz, 1H), 5.59 (d,  $J = 2.6$  Hz, 1H), 4.88 (d,  $J = 4.4$  Hz, 1H), 2.48 (td,  $J = 11.3, 3.5$  Hz, 1H), 1.84 – 1.76 (m, 1H), 1.76 – 1.66 (m, 1H), 1.64 – 1.57 (m, 2H), 1.52 – 1.45 (m, 1H), 1.45 – 1.37 (m, 1H), 1.22 – 1.12 (m, 2H), 1.08 – 1.02 (m, 1H), 1.00 – 0.94 (m, 1H), 0.19 (s, 9H).

$^{13}\text{C}$  NMR (125 MHz,  $\text{C}_6\text{D}_6$ )  $\delta$  156.9, 145.5, 128.2, 126.7, 125.9, 124.3, 72.6, 48.7, 36.5, 27.2, 26.6, 23.5, -0.8.

HRMS ( $\text{ES}^+$ )  $m/z$  311.1805 [(M+Na) $^+$ ; calcd for  $\text{C}_{18}\text{H}_{28}\text{OSiNa}$  311.1807].

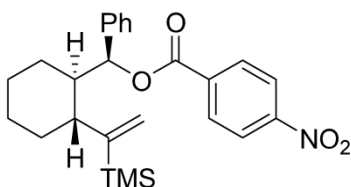

**Derivative 27.** Following the procedure for **26**, derivative **27** was prepared from **S2** (19 mg, 0.066 mmol) and isolated as a white solid.

Colorless crystal (29 mg, near quant., m.p. 93-94  $^{\circ}\text{C}$ ).

IR (neat) 2930, 2856, 1730, 1607, 1529, 1347, 1280, 1101, 840, 720, 700  $\text{cm}^{-1}$ .

$^1\text{H}$  NMR (500 MHz,  $\text{CDCl}_3$ )  $\delta$  8.34 (d,  $J = 8.8$  Hz, 2H), 8.27 (d,  $J = 8.8$  Hz, 2H), 7.31 (t,  $J = 7.7$  Hz, 2H), 7.23 (d,  $J = 8.0$  Hz, 1H), 7.17 (d,  $J = 8.0$  Hz, 2H), 6.13 (s, 1H), 5.73 (s, 1H), 5.60 (s, 1H), 2.31 (td,  $J = 11.4, 3.4$  Hz, 1H), 1.96 (t,  $J = 11.2$  Hz, 1H), 1.86 – 1.71 (m, 4H), 1.56 – 1.47 (m, 1H), 1.36 – 1.24 (m, 1H), 1.22 – 1.09 (m, 2H), 0.05 (s, 9H).

$^{13}\text{C}$  NMR (125 MHz,  $\text{CDCl}_3$ )  $\delta$  163.8, 155.5, 150.7, 140.3, 136.1, 130.8, 128.4, 127.3, 125.3, 123.9, 77.4, 46.9, 36.2, 26.9, 26.4, 24.9, -0.8.

HRMS ( $\text{ES}^+$ )  $m/z$  460.1917 [(M+Na) $^+$ ; calcd for  $\text{C}_{25}\text{H}_{31}\text{NO}_4\text{NaSi}$  460.1920].

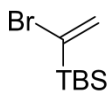

**(1-Bromovinyl)(tert-butyl)dimethylsilane (29).** To neat *tert*-butyldimethyl(vinyl)silane (6.73 mL, 35 mmol) was added dropwise liquid Br<sub>2</sub> (2.1 mL, 41 mmol) at -78 °C. After addition, the mixture was warmed to room temperature and stirred for 2 h. The flask was then fitted with a water-cooled condenser, and Et<sub>2</sub>NH (19.9 mL, 193 mmol) was cautiously added with continued stirring. After the addition was completed, the reaction mixture was heated at reflux for 12 hours, during which time a precipitate of diethylamine hydrochloride formed. The salts were separated from the cooled suspension by filtration and washed with Et<sub>2</sub>O (3×30 mL). The ether filtrate was carefully washed, first with 10 mL portions of 10% hydrochloric acid until the aqueous layer remains acidic (pH ca. 2), then with water (30 mL) and brine (30 mL). The ether solution was dried with anhydrous Na<sub>2</sub>SO<sub>4</sub>, concentrated, and purified by flash chromatography (hexanes) to give compound **29**.

Colorless oil (5.35g, 69%)

IR (neat) 2930, 2858, 1469, 1252, 913, 827, 776 cm<sup>-1</sup>.

<sup>1</sup>H NMR (500 MHz, CDCl<sub>3</sub>) δ 6.39 (d, *J* = 1.8 Hz, 1H), 6.21 (d, *J* = 1.8 Hz, 1H), 0.96 (s, 9H), 0.18 (s, 6H).

<sup>13</sup>C NMR (125 MHz, CDCl<sub>3</sub>) δ 136.1, 131.7, 26.9, 17.1, -5.7.

HRMS (CI<sup>+</sup>) *m/z* 220.0273 [(M)<sup>+</sup>; calcd for C<sub>8</sub>H<sub>17</sub>BrSi 220.0283].

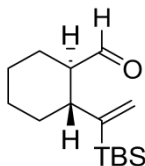

**Trans-TBS linchpin 31:** To a vigorously stirred mixture of magnesium turnings (197 mg, 8.2 mmol) in THF (1.3 mL) was added a few drops of (1-Bromovinyl) tert-



butyldimethylsilane (1.5 g, 6.8 mmol) in THF (1.3 mL). After the reaction initiation (iodine crystals were added), another 1.3 mL THF was added followed by the addition of the remaining (1-Bromovinyl)trimethylsilane solution. The reaction mixture was heated to reflux and kept for another hour. After cooling to room temperature, freshly prepared Grignard reagent was diluted with 1.3 mL THF and slowly cannulated into a suspension of CuBr·DMS (467 mg, 2.3 mmol) in THF (2.8 mL) and dimethyl sulfide (2.8 mL), followed by the addition of HMPA (2.4 mL, 13.8 mmol) at  $-78\text{ }^{\circ}\text{C}$ . Then to this mixture was added dropwise a THF (3 mL) solution of cyclohex-1-ene-1-carbaldehyde (485 mg, 4.4 mmol) and TMSCl (1.1 mL, 8.7 mmol) via syringe pump over 30 minutes. After another hour, the reaction mixture was warmed up to room temperature and quenched with 1 N HCl (10 mL) and extracted with Et<sub>2</sub>O (3×20 mL). The combined organic layer was washed with brine, dried over anhydrous Na<sub>2</sub>SO<sub>4</sub> and concentrated. The crude residue was then dissolved in MeOH (30 mL) and 1,8-Diazabicyclo[5.4.0]undec-7-ene (DBU) (1 mL, 6.7 mmol) was added. After stirring for 1 hour, the reaction mixture was directly concentrated and purified by column chromatography with silica gel (hexanes to 2:1 CH<sub>2</sub>Cl<sub>2</sub>/hexanes) to afford compound **31** as colorless oil (800 mg, 72 %) over two steps.

IR (neat) 2929, 2856, 2705, 1725, 1250, 824, 768 cm<sup>-1</sup>.

<sup>1</sup>H NMR (500 MHz, CDCl<sub>3</sub>) δ 9.51 (d, *J* = 3.5 Hz, 1H), 5.80 (dd, *J* = 1.8, 0.9 Hz, 1H), 5.51 (d, *J* = 1.7 Hz, 1H), 2.50 (tt, *J* = 11.4, 3.4 Hz, 1H), 2.26 (td, *J* = 11.4, 3.2 Hz, 1H), 1.94 – 1.72 (m, 4H), 1.48 – 1.20 (m, 3H), 1.14 – 0.98 (m, 1H), 0.87 (s, 9H), 0.07 (s, 3H), 0.05 (s, 3H).

<sup>13</sup>C NMR (125 MHz, CDCl<sub>3</sub>) δ 205.3, 152.6, 127.3, 55.1, 43.4, 34.8, 27.1, 26.9, 26.5, 25.0, 17.3, -5.4, -5.5.

HRMS (ES<sup>+</sup>) *m/z* 253.1983 [(M+H)<sup>+</sup>; calcd for C<sub>15</sub>H<sub>29</sub>OSi 253.1988].

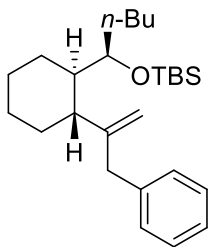

**Adduct 32.** To a solution of linchpin **31** (50 mg, 0.20 mmol) in freshly degassed Et<sub>2</sub>O (0.5 mL, degassed by three freeze-pump-thaw cycles) at -78 °C was added *n*-BuLi (86 μL, 0.22 mmol, 2.5 M in hexanes). After stirring for 30 min, the resulting solution was transferred to a suspension of CuBr·DMS (82 mg, 0.40 mmol) and *t*-BuOK (23 mg, 0.20 mmol) in freshly distilled HMPA (1 mL) in a microwave vial (2 - 5 mL) via cannula at room temperature. The reaction mixture was purged under a positive pressure of N<sub>2</sub> and then on high vacuum to remove Et<sub>2</sub>O. After the vial was refilled with N<sub>2</sub>, the resulting mixture was microwaved (Biotage: “high” level of absorption setting) at 100 °C for 5 min, followed by the addition of benzyl bromide (48 uL, 0.40 mmol). The resulting reaction mixture was stirred for 2 h at room temperature. then quenched with a saturated aqueous solution of NH<sub>4</sub>Cl (3 mL) and extracted with Et<sub>2</sub>O (3×5 mL). The combined organic layers were washed with brine (15 mL), dried over anhydrous Na<sub>2</sub>SO<sub>4</sub>, filtered and concentrated. The resulting crude residue was purified by flash chromatography (hexanes) to give compound **32** as a colorless oil 38 mg in 48% yield.

IR (neat) 3074, 2929, 2855, 1462, 1253, 1078, 900, 836, 773 cm<sup>-1</sup>.

<sup>1</sup>H NMR (500 MHz, CDCl<sub>3</sub>) δ 7.29 (t, *J* = 7.6 Hz, 2H), 7.22 – 7.18 (m, 1H), 7.16 (d, *J* = 7.3 Hz, 2H), 4.85 (s, 1H), 4.42 (s, 1H), 3.79 (dd, *J* = 9.4, 5.0 Hz, 1H), 3.30 (d, *J* = 16.4 Hz, 1H), 3.22 (d, *J* = 16.4 Hz, 1H), 2.20 (t, *J* = 11.4 Hz, 1H), 1.78 – 1.72 (m, 1H), 1.70 – 1.64 (m, 3H), 1.52 – 1.40 (m, 3H), 1.34 – 1.26 (m, 4H), 1.22 – 1.11 (m, 4H), 0.93 - 0.97 (m, 3H), 0.90 (s, 9H), 0.04 (s, 6H).

<sup>13</sup>C NMR (125 MHz, CDCl<sub>3</sub>) δ 153.4, 140.1, 129.8, 128.3, 126.0, 112.3, 72.3, 47.7, 42.9, 40.2, 35.3, 34.4, 28.5, 26.8, 26.5, 26.3, 23.8, 23.2, 18.5, 14.3, -3.0, -4.2.

HRMS (CI<sup>+</sup>) *m/z* 401.3252 [(M+H)<sup>+</sup>; calcd for C<sub>26</sub>H<sub>45</sub>OSi 401.3240].

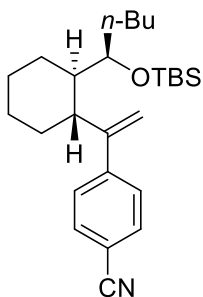

**Adduct 33.** To a solution of linchpin **27** (50 mg, 0.20 mmol) in freshly degassed Et<sub>2</sub>O (0.5 mL, degassed by three freeze-pump-thaw cycles) at -78 °C was added *n*-BuLi (86 μL, 0.22 mmol, 2.5 M in hexanes). After stirring for 30 min, the resulting solution was transferred to a suspension of CuBr·DMS (82 mg, 0.40 mmol) and *t*-BuOK (23 mg, 0.20 mmol) in freshly distilled HMPA (1 mL) in a microwave vial (2 - 5 mL) via cannula at room temperature. The reaction mixture was purged under a positive pressure of N<sub>2</sub> and then on high vacuum to remove Et<sub>2</sub>O. After the vial was refilled with N<sub>2</sub>, the resulting mixture was microwaved (Biotage: “high” level of absorption setting) at 100 °C for 5 min. A pre-mixed solution of Pd(PPh<sub>3</sub>)<sub>4</sub> (12 mg, 10 μmol) and 4-iodobenzonitrile (92 mg, 0.40 mmol) in THF (0.5 mL) was then added. The resulting mixture was stirred at room temperature overnight before addition of a saturated aqueous solution of NH<sub>4</sub>Cl (3 mL). The mixture was extracted with Et<sub>2</sub>O (3×5 mL) and the combined organic layers were washed with brine (15 mL), dried over anhydrous Na<sub>2</sub>SO<sub>4</sub>, filtered and concentrated. The resulting crude residue was purified by flash chromatography (1:25 EtOAc/hexanes) to give compound **33** as a colorless oil 50 mg in 61% yield.

IR (neat) 2930, 2855, 2228, 1605, 1462, 1252, 1085, 856, 773 cm<sup>-1</sup>.

<sup>1</sup>H NMR (500 MHz, CDCl<sub>3</sub>) δ 7.59 (d, *J* = 8.2 Hz, 2H), 7.47 (d, *J* = 8.6 Hz, 2H), 5.41 (s, 1H), 5.16 (s, 1H), 3.73 (dd, *J* = 9.6, 4.7 Hz, 1H), 2.56 – 2.44 (m, 1H), 1.99 (d, *J* = 11.3 Hz, 1H), 1.85 - 1.77 (m, 1H), 1.76 - 1.65 (m, 2H), 1.56 – 1.46 (m, 2H), 1.37 – 1.31 (m, 1H), 1.30 - 1.19 (m, 5H), 1.18 – 1.08 (m, 1H), 1.07- 0.96 (m, 1H), 0.89 – 0.85 (m, 4H), 0.77 (s, 9H), -0.09 (s, 3H), -0.37 (s, 3H).

<sup>13</sup>C NMR (125 MHz, CDCl<sub>3</sub>) δ 152.8, 148.3, 132.2, 127.3, 119.2, 115.2, 110.7, 72.0, 44.8,

44.4, 37.1, 35.0, 28.2, 26.9, 26.3, 26.1, 23.9, 23.0, 18.3, 14.2, -3.1, -4.8.

HRMS (ES<sup>+</sup>)  $m/z$  412.3025[(M+H)<sup>+</sup>; calcd for C<sub>26</sub>H<sub>42</sub>NOSi 412.3036].

### III. Computational Details

### (a) Computational methods

All DFT calculations were performed with the Gaussian 09[1]. Geometry optimizations were carried out at the M06 level of theory[2]. The SDD basis set[3] was used for Cu, Br, and I, and the 6-31G(d) basis set[4] for the other atoms (keyword 5D was used in the calculations). The vibrational frequencies were computed at the same level to evaluate its zero-point vibrational energy (ZPVE) and thermal corrections at 298 K. A quasiharmonic correction was applied during the entropy calculation by setting all positive frequencies that are less than  $100\text{ cm}^{-1}$  to  $100\text{ cm}^{-1}$ [5]. The single-point energies and solvent effects in tetrahydrofuran (THF) were computed at the M06/6-311+G(d,p)[SDD, for Cu, Br, and I] level using the gas-phase optimized structures. Solvation energies were evaluated by a self-consistent reaction field (SCRF) using the CPCM model[6], where UFF radii were used. The frontier molecular orbitals (FMOs) and their energies were computed at the HF/6-311+G(d,p)[SDD, for Cu, Br, and I] level using the M06-2X/6-31G(d)[SDD, for Cu, Br, and I] geometries.

[1] Frisch, M. J.; Trucks, G. W.; Schlegel, H. B.; Scuseria, G. E.; Robb, M. A.; Cheeseman, J. R.; Scalmani, G.; Barone, V.; Mennucci, B.; Petersson, G. A.; Nakatsuji, H.; Caricato, M.; Li, X.; Hratchian, H. P.; Izmaylov, A. F.; Bloino, J.; Zheng, G.; Sonnenberg, J. L.; Hada, M.; Ehara, M.; Toyota, K.; Fukuda, R.; Hasegawa, J.; Ishida, M.; Nakajima, T.; Honda, Y.; Kitao, O.; Nakai, H.; Vreven, T.; Montgomery, J. A., Jr.; Peralta, J. E.; Ogliaro, F.; Bearpark, M.; Heyd, J. J.; Brothers, E.; Kudin, K. N.; Staroverov, V. N.; Keith, T.; Kobayashi, R.; Normand, J.; Raghavachari, K.; Rendell, A.; Burant, J. C.; Iyengar, S. S.; Tomasi, J.; Cossi, M.; Rega, N.; Millam, J. M.; Klene, M.; Knox, J. E.; Cross, J. B.; Bakken, V.; Adamo, C.; Jaramillo, J.; Gomperts, R.; Stratmann, R. E.; Yazyev, O.; Austin, A. J.; Cammi, R.; Pomelli, C.; Ochterski, J. W.; Martin, R. L.; Morokuma, K.; Zakrzewski, V. G.; Voth, G. A.; Salvador, P.; Dannenberg, J. J.; Dapprich, S.; Daniels, A. D.; Farkas, O.; Foresman, J. B.; Ortiz, J. V.; Cioslowski, J.; Fox, D. J.; *Gaussian 09, revision D.01*; Gaussian Inc.: Wallingford, CT, 2013.

[2] (a) Zhao, Y.; Truhlar, D. G. *Theor. Chem. Acc.* **2008**, *120*, 215. (b) Zhao, Y.; Truhlar, D. G. *Acc. Chem. Res.* **2008**, *41*, 157.

[3] (a) Szentpaly, L. V.; Fuentealba, P.; Preuss, H.; Stoll, H. *Chem. Phys. Lett.* **1982**, *93*, 555. (b) Dolg, M.; Wedig, U.; Stoll, H.; Preuss, H. *J. Chem. Phys.* **1987**, *86*, 866. (c) Schwerdtfeger, P.; Dolg, M.; Schwarz, W. H. E.; Bowmaker, G. A.; Boyd, P. D. W. *J. Chem. Phys.* **1989**, *91*, 1762.

[4] Hehre, W. J.; Radom, L.; Schleyer, P. v. R.; Pople, J. A. *Ab Initio Molecular Orbital Theory*; Wiley: New York, 1986.

[5] (a) Zhao, Y.; Truhlar, D. G. *Phys. Chem. Chem. Phys.* **2008**, *10*, 2813. (b) Ribeiro, R. F.; Marenich, A. V.; Cramer, C. J.; Truhlar, D. G. *J. Phys. Chem. B* **2011**, *115*, 14556.

[6] (a) Barone, V.; Cossi, M. *J. Phys. Chem. A* **1998**, *102*, 1995. (b) Cossi, M.; Rega, N.; Scalmani, G.; Barone, V. *J. Comput. Chem.* **2003**, *24*, 669. (c) Takano, Y.; Houk, K. N. *J. Chem. Theory Comput.* **2005**, *1*, 70.

(b)Coordinates and energies of stationary points

**A**

$G_{\text{sol}} = -687.041269$  Hartree

-----  
C -2.806075 -0.177045 1.447783  
H -2.205635 -0.120988 2.367920  
H -3.442391 -1.070632 1.492946  
H -3.462933 0.704943 1.407373  
C -1.928133 -0.227798 0.199638  
C -1.089753 1.023370 0.118851  
H -1.700010 1.941475 0.103082  
C 0.244782 1.123992 0.022508  
C 0.891544 2.481219 -0.081530  
H 1.611283 2.657035 0.732904  
H 1.462112 2.595821 -1.016214  
H 0.146691 3.289523 -0.044350  
O -2.676808 -0.363156 -0.937817  
Li -3.357154 -0.177037 -2.393773  
Si 1.365283 -0.394953 -0.007814  
C 3.147489 0.162397 -0.299293  
H 3.504392 0.839459 0.488492  
H 3.814958 -0.710611 -0.309268  
H 3.267394 0.677751 -1.261977  
C 0.891601 -1.548731 -1.427356  
H -0.194778 -1.698043 -1.480182  
H 1.217869 -1.118546 -2.384668  
H 1.374222 -2.530364 -1.322589  
C 1.344461 -1.316460 1.640241  
H 0.344327 -1.684269 1.903046  
H 2.025721 -2.178683 1.611237  
H 1.678919 -0.656151 2.451962  
H -1.245664 -1.097691 0.328496

**Ac**

$G_{\text{sol}} = -895.938339$  Hartree

-----  
C -1.802346 3.574908 -0.082579  
H -2.846727 3.617529 0.257898  
H -1.708419 4.175194 -0.995599  
H -1.162409 4.027376 0.688326  
C -1.351072 2.149718 -0.353153  
H -2.038434 1.715691 -1.113468  
C -1.449116 1.304363 0.910308  
H -1.307924 1.863186 1.848629  
C -1.672098 -0.049917 0.987656  
C -1.782984 -0.692041 2.352692  
H -2.822762 -1.001900 2.546366  
H -1.166424 -1.596421 2.435646  
H -1.487467 -0.001532 3.154983  
C -4.031265 -0.984642 -0.703952  
H -4.411164 -1.696022 -1.449802  
H -4.568756 -1.168843 0.236272  
H -4.287597 0.027978 -1.042501  
C -1.268544 -0.855960 -2.090337  
H -1.254572 0.199941 -2.385272  
H -0.227654 -1.204574 -2.032192  
H -1.763539 -1.428723 -2.888246  
C -1.770951 -2.944308 0.054048  
H -2.343333 -3.266054 0.933781  
H -1.995928 -3.642165 -0.763794  
H -0.700615 -3.044788 0.286747  
Si -2.171878 -1.183586 -0.471602  
O -0.038236 2.096633 -0.783209  
Li 1.552281 1.822229 -1.317157  
Cu 0.366704 0.326761 0.490023  
I 2.684621 -0.410079 -0.067113

**Ap**

$G_{\text{sol}} = -895.948494$  Hartree

```

-----
C -2.916897  2.083311  0.861396
H -2.770738  2.969099  1.491816
H -3.520353  1.364198  1.430588
H -3.485231  2.385412  -0.029337
C -1.572478  1.520934  0.454816
C -0.708893  2.563080  -0.201264
H -1.269075  3.386721  -0.675020
C  0.641560  2.561693  -0.208971
C  1.348954  3.707658  -0.875872
H  1.984158  4.237398  -0.151773
H  2.031717  3.357561  -1.664083
H  0.658309  4.444679  -1.320550
O -1.747799  0.406303  -0.478245
H -1.043891  1.113738  1.333895
C -2.243400  -1.582363  1.605131
H -2.633820  -0.895695  2.367320
H -2.694064  -2.566989  1.788422
H -1.159103  -1.680492  1.756474
C -4.444964  -0.768818  -0.443726
H -4.942090  -0.196955  0.348970
H -4.610620  -0.242672  -1.393079
H -4.948613  -1.742706  -0.514644
C -1.921866  -2.213263  -1.407940
H -0.852830  -2.413172  -1.238234
H -2.437379  -3.181346  -1.355461
H -2.053886  -1.835442  -2.431957
Si -2.612897  -1.019146  -0.139434
Cu  1.644631  1.025876  0.353714
I  2.030780  -1.420169  0.016636
Li -0.035760  0.266471  -1.268726
-----

```

**B**

$G_{\text{sol}} = -687.041467$  Hartree

```

-----
C  0.756613  -0.368551  -3.430179
H  1.462968  0.415657  -3.745146
H -0.240034  0.086774  -3.343749

```

```

H  0.727133  -1.134682  -4.216039
C  1.241813  -0.983499  -2.121319
H  0.477348  -1.735805  -1.805209
C  1.305364  0.086426  -1.014335
H  2.035330  0.849893  -1.339885
H  1.740356  -0.409458  -0.129492
C -0.004066  0.730679  -0.650446
C -0.201661  2.039563  -0.851809
H  0.572070  2.676674  -1.292201
H -1.133252  2.544961  -0.590093
C -2.422958  -1.174645  -1.198384
H -1.830459  -1.884437  -1.790028
H -3.247814  -1.729390  -0.729343
H -2.861763  -0.445870  -1.893407
C -0.632704  -1.595245  1.266185
H -1.420900  -2.179287  1.760633
H  0.008255  -2.297667  0.716624
H -0.022406  -1.127025  2.050141
C -2.539518  0.807771  1.107223
H -1.993961  1.391735  1.859637
H -3.082235  1.512841  0.463460
H -3.290473  0.200580  1.631254
Si -1.384532  -0.304762  0.114981
O  2.461643  -1.573274  -2.276642
Li  3.955204  -2.143185  -2.485389
-----

```

**Bc**

$G_{\text{sol}} = -895.949807$  Hartree

```

-----
C  2.02082  -0.10361  -0.7414
C  1.56364  -0.03945  -2.03749
C  2.22834  -1.4445  -0.07088
H  1.53317  -1.55162  0.7794
H  2.00276  -2.25877  -0.78237
C  3.67609  -1.61465  0.41517
H  3.82023  -0.91125  1.26784
C  3.90941  -3.0221  0.93725
H  3.76247  -3.74844  0.12499

```



|    |         |          |          |
|----|---------|----------|----------|
| H  | 4.93841 | -3.12696 | 1.30508  |
| H  | 3.22463 | -3.27521 | 1.75865  |
| O  | 4.55586 | -1.30895 | -0.61127 |
| Li | 6.00313 | -1.19683 | -1.54079 |
| Si | 2.22305 | 1.50455  | 0.27062  |
| C  | 1.41454 | 1.23052  | 1.94857  |
| H  | 1.94514 | 0.4663   | 2.53243  |
| H  | 1.42757 | 2.16017  | 2.53335  |
| H  | 0.36818 | 0.91293  | 1.84938  |
| C  | 4.02963 | 1.98341  | 0.50241  |
| H  | 4.51443 | 2.18946  | -0.46302 |
| H  | 4.08459 | 2.90428  | 1.10115  |
| H  | 4.61657 | 1.2103   | 1.01322  |
| C  | 1.38023 | 2.90703  | -0.65544 |
| H  | 1.42824 | 3.82771  | -0.05821 |
| H  | 1.88888 | 3.1124   | -1.60789 |
| H  | 0.32353 | 2.70005  | -0.8679  |
| H  | 1.2967  | -0.94653 | -2.58958 |
| H  | 1.27067 | 0.89924  | -2.50957 |
| I  | 5.52077 | 0.469    | -3.6553  |
| Cu | 3.67431 | -0.06406 | -1.99286 |

**Bp**

$G_{\text{sol}} = -895.949383$  Hartree

|   |          |         |          |
|---|----------|---------|----------|
| C | 1.8729   | 1.33804 | -0.4178  |
| C | 2.30493  | 1.75934 | -1.62575 |
| C | 0.84776  | 2.18992 | 0.29273  |
| H | 1.30048  | 2.63788 | 1.19236  |
| H | 0.49899  | 3.02946 | -0.34097 |
| C | -0.36171 | 1.39386 | 0.76457  |
| H | -0.02522 | 0.67105 | 1.52953  |
| C | -1.45045 | 2.28608 | 1.31927  |
| H | -1.85155 | 2.93154 | 0.52593  |
| H | -2.28121 | 1.71114 | 1.74975  |
| H | -1.04784 | 2.92707 | 2.11377  |
| H | 1.99658  | 2.72167 | -2.06058 |
| H | 3.05264  | 1.20702 | -2.20152 |

|    |          |          |          |
|----|----------|----------|----------|
| O  | -0.86247 | 0.6266   | -0.35551 |
| Si | -2.02648 | -0.60789 | -0.21963 |
| Cu | 2.27702  | -0.41626 | 0.26003  |
| C  | -1.49198 | -1.74818 | -1.61987 |
| H  | -1.4331  | -1.22494 | -2.58869 |
| H  | -0.53045 | -2.24433 | -1.40234 |
| H  | -2.218   | -2.55853 | -1.76505 |
| C  | -1.89898 | -1.45892 | 1.43518  |
| H  | -2.16766 | -0.80732 | 2.27638  |
| H  | -2.5782  | -2.32173 | 1.46006  |
| H  | -0.87964 | -1.83821 | 1.60082  |
| C  | -3.73022 | 0.08029  | -0.57144 |
| H  | -4.46424 | -0.73355 | -0.64518 |
| H  | -4.07619 | 0.76695  | 0.21077  |
| H  | -3.7412  | 0.62526  | -1.5243  |
| Li | 0.53075  | -0.01192 | -1.51778 |
| I  | 2.10755  | -2.84421 | 0.60508  |

**BrCuBr<sup>-</sup>**

$G_{\text{sol}} = -224.401805$  Hartree

|    |          |         |    |
|----|----------|---------|----|
| Cu | -0.31317 | 0.22678 | 0. |
| Br | 1.97897  | 0.22678 | 0. |
| Br | -2.60532 | 0.22678 | 0. |

**Cc**

$G_{\text{sol}} = -924.311820$  Hartree

|   |         |          |          |
|---|---------|----------|----------|
| C | 2.04327 | -0.10947 | -0.73345 |
| C | 1.57966 | -0.033   | -2.02425 |
| C | 2.22899 | -1.45629 | -0.06874 |
| H | 1.47928 | -1.58143 | 0.73257  |
| H | 2.05837 | -2.26205 | -0.8053  |
| C | 3.6463  | -1.61533 | 0.49671  |
| H | 3.73064 | -0.91915 | 1.36737  |
| C | 3.86164 | -3.02378 | 1.02993  |
| H | 3.76048 | -3.7494  | 0.20962  |
| H | 4.87338 | -3.12093 | 1.4441   |

|    |         |          |          |
|----|---------|----------|----------|
| H  | 3.1397  | -3.28463 | 1.81714  |
| O  | 4.56529 | -1.29108 | -0.47382 |
| Li | 5.81388 | -0.99476 | -1.58282 |
| Si | 2.23033 | 1.48254  | 0.29917  |
| C  | 1.36263 | 1.20955  | 1.94863  |
| H  | 1.87409 | 0.45619  | 2.56189  |
| H  | 1.3372  | 2.14432  | 2.52527  |
| H  | 0.32544 | 0.87863  | 1.80449  |
| C  | 4.0355  | 1.9431   | 0.58321  |
| H  | 4.49221 | 2.31616  | -0.34488 |
| H  | 4.10557 | 2.742    | 1.3352   |
| H  | 4.63184 | 1.0876   | 0.92389  |
| C  | 1.40575 | 2.90285  | -0.62097 |
| H  | 1.47854 | 3.82347  | -0.02581 |
| H  | 1.89806 | 3.09871  | -1.58384 |
| H  | 0.34162 | 2.71274  | -0.81284 |
| H  | 1.31879 | -0.93552 | -2.58651 |
| H  | 1.27801 | 0.90911  | -2.48462 |
| Cu | 3.68654 | 0.03064  | -2.01728 |
| C  | 5.25358 | 0.3777   | -3.18761 |
| H  | 6.09566 | 0.92715  | -2.71837 |
| H  | 5.69073 | -0.48458 | -3.7318  |
| H  | 4.91386 | 1.04563  | -3.98891 |

**Cp**

$G_{\text{sol}} = -924.315879$  Hartree

|   |          |          |          |
|---|----------|----------|----------|
| C | -1.74314 | -1.46399 | -0.49243 |
| C | -2.28654 | -1.7937  | -1.68524 |
| C | -0.62301 | -2.34996 | 0.00869  |
| H | -0.97884 | -2.94297 | 0.86762  |
| H | -0.2815  | -3.07685 | -0.75659 |
| C | 0.57271  | -1.55046 | 0.50562  |
| H | 0.25424  | -0.98269 | 1.39654  |
| C | 1.76719  | -2.41894 | 0.82984  |
| H | 2.1425   | -2.90352 | -0.08162 |
| H | 2.58836  | -1.84127 | 1.276    |
| H | 1.48514  | -3.20203 | 1.54526  |

|    |          |          |          |
|----|----------|----------|----------|
| H  | -2.00583 | -2.70056 | -2.24384 |
| H  | -3.10625 | -1.21689 | -2.12525 |
| O  | 0.93096  | -0.58155 | -0.51327 |
| Si | 1.86144  | 0.79976  | -0.1863  |
| Cu | -2.13834 | 0.21741  | 0.43669  |
| C  | 1.14734  | 2.02203  | -1.43029 |
| H  | 1.16177  | 1.62736  | -2.45919 |
| H  | 0.12055  | 2.32064  | -1.16227 |
| H  | 1.73488  | 2.94881  | -1.4567  |
| C  | 1.5717   | 1.38731  | 1.56052  |
| H  | 1.96374  | 0.69429  | 2.31623  |
| H  | 2.06129  | 2.3577   | 1.71799  |
| H  | 0.49414  | 1.52034  | 1.73902  |
| C  | 3.66365  | 0.4747   | -0.57018 |
| H  | 4.24627  | 1.4031   | -0.49842 |
| H  | 4.11225  | -0.25004 | 0.12047  |
| H  | 3.78297  | 0.08369  | -1.58882 |
| C  | -2.36211 | 1.94633  | 1.23578  |
| H  | -3.41426 | 2.26713  | 1.17469  |
| H  | -2.09766 | 1.91664  | 2.30659  |
| H  | -1.76101 | 2.75463  | 0.78495  |
| Li | -0.60909 | -0.00156 | -1.52331 |

**CuBr**

$G_{\text{sol}} = -210.807207$  Hartree

|    |          |         |          |
|----|----------|---------|----------|
| Br | -2.44012 | 0.36649 | -0.12536 |
| Cu | -4.6539  | 0.36649 | -0.12536 |

**CuI**

$G_{\text{sol}} = -208.851716$  Hartree

|    |          |         |          |
|----|----------|---------|----------|
| I  | -1.26615 | 0.55789 | -0.11077 |
| Cu | -3.64474 | 0.55789 | -0.11077 |

**D**

$G_{\text{sol}} = -726.303854$  Hartree

|    |           |           |           |
|----|-----------|-----------|-----------|
| C  | -2.855047 | -0.400613 | 0.310183  |
| H  | -2.814603 | -0.641995 | 1.401423  |
| C  | -1.398866 | -0.274084 | -0.154002 |
| H  | -1.399756 | -0.045417 | -1.234794 |
| H  | -0.891313 | -1.247523 | -0.032701 |
| C  | -0.635970 | 0.812030  | 0.596175  |
| H  | -1.243734 | 1.731304  | 0.583394  |
| H  | -0.555388 | 0.506268  | 1.655738  |
| C  | 0.737783  | 1.092888  | 0.045969  |
| C  | 1.048196  | 2.306977  | -0.423805 |
| H  | 0.322056  | 3.126450  | -0.426637 |
| H  | 2.033223  | 2.551908  | -0.824994 |
| C  | -3.520038 | -1.582587 | -0.389220 |
| H  | -4.561833 | -1.679473 | -0.056427 |
| H  | -3.527505 | -1.409913 | -1.476114 |
| H  | -3.002425 | -2.533097 | -0.192497 |
| C  | 1.803933  | -1.420081 | -1.462244 |
| H  | 2.623869  | -2.149690 | -1.518258 |
| H  | 0.859902  | -1.976830 | -1.412285 |
| H  | 1.802350  | -0.846367 | -2.398813 |
| C  | 3.758851  | 0.491722  | -0.124387 |
| H  | 3.906787  | 0.988379  | -1.092821 |
| H  | 3.941879  | 1.232552  | 0.664676  |
| H  | 4.527034  | -0.288892 | -0.037472 |
| C  | 1.935658  | -1.263386 | 1.615830  |
| H  | 2.715621  | -2.036187 | 1.646924  |
| H  | 2.072664  | -0.616279 | 2.492578  |
| H  | 0.965601  | -1.767052 | 1.721772  |
| Si | 2.041018  | -0.272209 | 0.015697  |
| O  | -3.552784 | 0.752333  | 0.091097  |
| Li | -4.391136 | 2.105637  | -0.166072 |

-----  
**Dc**

$G_{\text{sol}} = -963.573633$  Hartree

-----  

|   |          |           |           |
|---|----------|-----------|-----------|
| C | 2.174047 | -1.303475 | -0.164627 |
| H | 2.785680 | -1.074109 | -1.070470 |
| C | 0.920481 | -2.019843 | -0.670596 |

|    |           |           |           |
|----|-----------|-----------|-----------|
| H  | 0.315473  | -2.324368 | 0.201155  |
| H  | 1.233273  | -2.951844 | -1.167905 |
| C  | 0.068765  | -1.213903 | -1.649884 |
| H  | 0.712579  | -0.836094 | -2.464951 |
| H  | -0.647468 | -1.904036 | -2.129206 |
| C  | -0.732388 | -0.072897 | -1.060308 |
| C  | -0.840502 | 1.127134  | -1.741129 |
| H  | -0.317778 | 1.284227  | -2.691099 |
| H  | -1.598876 | 1.873472  | -1.502579 |
| C  | 2.985864  | -2.245607 | 0.714775  |
| H  | 3.904874  | -1.751747 | 1.058767  |
| H  | 2.397986  | -2.519178 | 1.604044  |
| H  | 3.269449  | -3.167678 | 0.187838  |
| C  | -3.247802 | 0.913562  | 0.439261  |
| H  | -3.939010 | 0.711108  | 1.269011  |
| H  | -2.812003 | 1.907509  | 0.612808  |
| H  | -3.838072 | 0.954841  | -0.485398 |
| C  | -2.727755 | -2.096154 | 0.097629  |
| H  | -3.232890 | -2.131072 | -0.877057 |
| H  | -2.001975 | -2.919408 | 0.129321  |
| H  | -3.483177 | -2.290796 | 0.871361  |
| C  | -1.058278 | -0.408703 | 2.068538  |
| H  | -1.748704 | -0.772914 | 2.843097  |
| H  | -0.149715 | -1.022303 | 2.080401  |
| H  | -0.761165 | 0.615302  | 2.339878  |
| Si | -1.917504 | -0.418521 | 0.390471  |
| O  | 1.888752  | -0.141627 | 0.531920  |
| Li | 2.473323  | 1.337841  | 1.195408  |
| Cu | 0.574104  | 1.277491  | -0.248625 |
| C  | 1.332179  | 2.991755  | 0.500157  |
| H  | 2.360598  | 3.284493  | 0.201772  |
| H  | 1.264720  | 3.142725  | 1.598536  |
| H  | 0.704578  | 3.792203  | 0.089733  |

-----  
**Dp**

$G_{\text{sol}} = -963.574806$  Hartree

-----  

|   |           |           |           |
|---|-----------|-----------|-----------|
| C | -1.675123 | -2.093258 | -1.940738 |
|---|-----------|-----------|-----------|

H -1.623251 -3.185050 -2.035100  
 H -1.150441 -1.654908 -2.801673  
 H -2.729066 -1.792535 -1.993504  
 C -1.026519 -1.637628 -0.651642  
 H -1.548844 -2.092675 0.210962  
 C 0.447687 -1.991617 -0.580782  
 H 0.968501 -1.428590 -1.377754  
 H 0.550637 -3.049979 -0.863805  
 C 1.126039 -1.727931 0.776416  
 H 1.313745 -2.696043 1.278833  
 H 0.406708 -1.194221 1.421392  
 C 2.393693 -0.903273 0.674005  
 C 3.527146 -1.437388 1.151070  
 H 4.482616 -0.909382 1.119428  
 H 3.565062 -2.439515 1.604750  
 O -1.179641 -0.198194 -0.551536  
 C -2.004141 2.347746 0.137694  
 H -2.727393 2.973119 0.676763  
 H -1.007293 2.673851 0.473706  
 H -2.114930 2.591181 -0.929741  
 C -4.036609 -0.005554 0.055779  
 H -4.280253 0.234526 -0.987065  
 H -4.181124 -1.085003 0.197870  
 H -4.766975 0.505899 0.696862  
 C -1.887301 0.139838 2.276431  
 H -0.865415 0.465638 2.515109  
 H -2.575792 0.667016 2.950927  
 H -1.959105 -0.931432 2.503614  
 Si -2.299005 0.529209 0.497246  
 Cu 2.222044 0.814141 -0.158342  
 Li 0.138350 1.083149 -1.096899  
 C 1.753956 2.480514 -1.123507  
 H 1.137826 3.236273 -0.601504  
 H 2.753995 2.934242 -1.195655  
 H 1.406717 2.465977 -2.179301

E

$G_{\text{sol}} = -878.615574$  Hartree

-----

C -2.37049 1.14951 1.23644  
 C -1.6492 1.03659 0.04619  
 C -0.94678 2.14926 -0.4607  
 C -1.01165 3.34384 0.25581  
 C -1.73443 3.45172 1.44259  
 C -2.4187 2.35029 1.93823  
 H -2.90896 0.27485 1.6081  
 H -0.48706 4.22076 -0.12158  
 H -1.76222 4.40127 1.97606  
 H -2.99083 2.42203 2.86232  
 C -0.12016 1.97833 -1.73539  
 H -0.83626 1.60388 -2.5059  
 C 0.43398 3.29062 -2.27651  
 H 0.97391 3.08313 -3.20829  
 H -0.35113 4.03075 -2.48828  
 H 1.15259 3.7277 -1.56821  
 C -1.61008 -0.29079 -0.62042  
 C -2.50862 -0.63568 -1.54895  
 H -2.51093 -1.62208 -2.0212  
 H -3.28158 0.05617 -1.89215  
 C 0.87306 -0.76994 1.19351  
 H 1.09693 0.28999 1.00037  
 H 0.39375 -0.78933 2.1816  
 H 1.80706 -1.34662 1.29735  
 C -1.13541 -3.01165 0.75687  
 H -0.39685 -3.7517 1.09425  
 H -1.71253 -2.6884 1.63409  
 H -1.82974 -3.51664 0.07184  
 C 0.657 -2.17597 -1.57909  
 H 1.66103 -2.55798 -1.32644  
 H 0.12392 -3.02475 -2.02816  
 H 0.72854 -1.40464 -2.36011  
 Si -0.31536 -1.53547 -0.07429  
 O 0.88141 1.06977 -1.52955  
 Li 1.95245 -0.05666 -1.00485

-----

Ec

G<sub>sol</sub> = -1115.897317 Hartree

-----  
C 3.44583 1.3611 -1.94785  
C 2.46586 0.37935 -1.85613  
C 1.64739 0.26123 -0.72784  
C 1.82456 1.16209 0.3488  
C 2.81258 2.13925 0.23553  
C 3.61931 2.24674 -0.89438  
H 4.07174 1.42466 -2.8368  
H 2.33199 -0.33277 -2.67111  
H 2.96328 2.84587 1.04966  
H 4.38138 3.02308 -0.94451  
C 0.62827 -0.82838 -0.71599  
C -0.21555 -0.98108 -1.81351  
H -0.16125 -0.30446 -2.67194  
H -0.7826 -1.8984 -1.98061  
Si 0.7765 -2.30077 0.49362  
C 0.52281 -3.88802 -0.49371  
H 1.18492 -3.93249 -1.36821  
H 0.74224 -4.75924 0.13935  
H -0.51181 -3.99541 -0.84633  
C 2.51429 -2.34378 1.21542  
H 2.65479 -3.26254 1.80128  
H 3.26361 -2.33993 0.41201  
H 2.73026 -1.49042 1.86974  
C -0.54568 -2.27119 1.8364  
H -1.54278 -2.38472 1.38559  
H -0.39957 -3.11149 2.53003  
H -0.55043 -1.33847 2.41343  
C 0.92927 1.0632 1.58123  
H 1.13177 0.06484 2.03159  
C 1.25488 2.08104 2.66434  
H 2.28712 1.99923 3.03031  
H 1.09107 3.10422 2.29678  
H 0.57931 1.91371 3.51225  
O -0.41619 1.15118 1.25353  
Li -2.01179 1.77044 1.11239  
Cu -1.12657 0.09165 -0.3395

C -3.03235 0.72886 -0.45334  
H -3.20196 1.78695 -0.74229  
H -3.49297 0.16015 -1.26993  
H -3.68997 0.52296 0.41706  
-----

### Ep

G<sub>sol</sub> = -1115.906710 Hartree

-----  
C -0.21965 3.51813 -1.60045  
C 0.72593 2.72397 -0.96359  
C 0.36481 1.78621 0.01498  
C -1.00772 1.65774 0.34044  
C -1.94365 2.46526 -0.30466  
C -1.56313 3.39251 -1.26967  
H 0.09632 4.24154 -2.35098  
H 1.78336 2.83558 -1.20138  
H -3.00052 2.37223 -0.05776  
H -2.31442 4.01367 -1.75417  
C 1.42241 0.9944 0.67591  
C 2.28552 0.32019 -0.11911  
H 2.22458 0.32447 -1.21823  
H 3.14376 -0.22354 0.29202  
C -1.43046 0.63654 1.36985  
H -0.85829 0.83532 2.29411  
C -2.90153 0.59988 1.71732  
H -3.22322 1.55414 2.15108  
H -3.52955 0.39798 0.83765  
H -3.08447 -0.19149 2.45377  
O -0.99369 -0.69821 0.98698  
Cu 1.64922 1.00792 2.63094  
Si -1.5028 -1.60032 -0.35589  
C -3.10915 -2.48471 0.02437  
H -3.3261 -3.23315 -0.75  
H -3.0512 -3.00824 0.98765  
H -3.96287 -1.79693 0.06796  
C -0.09207 -2.84066 -0.47115  
H 0.03851 -3.40187 0.46707  
H -0.27946 -3.58671 -1.25418

H 0.85759 -2.34823 -0.73408  
 C -1.62575 -0.58397 -1.91764  
 H -2.44977 0.13898 -1.87736  
 H -0.70393 -0.01605 -2.10311  
 H -1.80051 -1.249 -2.77508  
 Li 0.83843 -0.96364 1.40449  
 C 1.89366 0.91226 4.52397  
 H 1.81602 -0.09852 4.95326  
 H 2.89492 1.29416 4.78029  
 H 1.15656 1.54297 5.04575

**F**

$G_{\text{sol}} = -882.173283$  Hartree

C 3.01361 -0.73517 -1.79826  
 C 1.62335 -0.11159 -1.8273  
 C 0.65819 -0.84514 -0.89417  
 C 1.19724 -0.94402 0.55507  
 C 2.61022 -1.53643 0.53567  
 C 3.57003 -0.78765 -0.38135  
 H 1.69167 0.94041 -1.51767  
 H 1.22222 -0.12844 -2.85303  
 H 2.95694 -1.76317 -2.19873  
 H 3.69305 -0.18318 -2.46576  
 H 0.55981 -1.68312 1.07888  
 H 3.01358 -1.59022 1.55733  
 H 2.54004 -2.5818 0.18371  
 H 3.70095 0.23479 0.00268  
 H 4.55776 -1.27308 -0.37585  
 H 0.62978 -1.89399 -1.25849  
 C 1.0302 0.35652 1.37884  
 H -0.07101 0.53428 1.38552  
 O 1.67838 1.4513 0.87269  
 Li 2.21481 2.94266 0.53708  
 C 1.43368 0.13213 2.83648  
 H 2.5265 0.04044 2.91802  
 H 1.13242 1.0014 3.43653  
 H 0.9755 -0.76596 3.27929

C -0.77183 -0.34815 -0.94117  
 C -1.1194 0.79898 -1.53814  
 H -0.39195 1.4648 -2.00831  
 H -2.15597 1.13643 -1.58842  
 Si -2.13818 -1.42105 -0.19376  
 C -2.33596 -1.16685 1.66517  
 H -3.19869 -1.73942 2.0348  
 H -1.4514 -1.4851 2.23181  
 H -2.51203 -0.10736 1.89586  
 C -1.75908 -3.23745 -0.53442  
 H -1.64825 -3.4292 -1.61018  
 H -0.83527 -3.56658 -0.03971  
 H -2.57541 -3.87335 -0.16517  
 C -3.79285 -0.99607 -0.99283  
 H -4.56436 -1.69584 -0.64251  
 H -4.13079 0.01608 -0.73298  
 H -3.74829 -1.06535 -2.08736

**Fc**

$G_{\text{sol}} = -1119.435776$  Hartree

C -4.6203 -0.74252 -0.07782  
 C -3.40594 -1.46864 0.48071  
 C -2.10605 -0.64712 0.44248  
 C -2.27971 0.80605 0.97784  
 C -3.55375 1.43057 0.39437  
 C -4.80608 0.59835 0.61159  
 H -3.62155 -1.75419 1.52352  
 H -3.25882 -2.40441 -0.07803  
 H -4.48758 -0.57103 -1.16057  
 H -5.51089 -1.37859 0.02978  
 H -1.45828 1.39524 0.53788  
 H -3.68138 2.45179 0.77692  
 H -3.40798 1.53963 -0.6954  
 H -4.97607 0.44381 1.69019  
 H -5.68946 1.12187 0.21769  
 H -1.85891 -0.51554 -0.6324  
 C -2.07239 0.96948 2.51208

|    |          |          |          |
|----|----------|----------|----------|
| H  | -0.96882 | 1.04401  | 2.63945  |
| O  | -2.53665 | -0.08099 | 3.28315  |
| Li | -2.95279 | -0.97196 | 4.68729  |
| C  | -2.61941 | 2.28982  | 3.03982  |
| H  | -3.71823 | 2.30332  | 3.0137   |
| H  | -2.30851 | 2.4148   | 4.08571  |
| H  | -2.24736 | 3.15407  | 2.46992  |
| C  | -0.92759 | -1.40269 | 1.06398  |
| C  | -0.94956 | -2.78099 | 1.2475   |
| H  | -1.78438 | -3.41722 | 0.94592  |
| H  | -0.0365  | -3.33224 | 1.48289  |
| Si | 0.82961  | -0.66778 | 1.24674  |
| C  | 1.34475  | -0.64651 | 3.06159  |
| H  | 2.36356  | -0.24551 | 3.16297  |
| H  | 0.67602  | -0.03476 | 3.68283  |
| H  | 1.3449   | -1.66399 | 3.47853  |
| C  | 1.06189  | 1.04551  | 0.49153  |
| H  | 0.64881  | 1.10842  | -0.52445 |
| H  | 0.62033  | 1.85139  | 1.09089  |
| H  | 2.1411   | 1.24328  | 0.41702  |
| C  | 2.03254  | -1.79995 | 0.33101  |
| H  | 3.0456   | -1.37523 | 0.37001  |
| H  | 2.08189  | -2.80509 | 0.76927  |
| H  | 1.75637  | -1.90996 | -0.72617 |
| C  | -2.08758 | -2.92958 | 4.62111  |
| H  | -1.60213 | -3.90626 | 4.50334  |
| H  | -1.6971  | -2.55448 | 5.59036  |
| H  | -3.15523 | -3.18539 | 4.78378  |
| Cu | -1.60745 | -1.89544 | 2.95529  |

-----  
**Fp**

$G_{\text{sol}} = -1119.451284$  Hartree

-----

|   |         |         |          |
|---|---------|---------|----------|
| C | 2.7034  | 2.84887 | -0.10119 |
| C | 2.57056 | 1.34313 | 0.08924  |
| C | 1.36528 | 0.98003 | 0.96299  |
| C | 0.03578 | 1.58105 | 0.42859  |
| C | 0.22162 | 3.08618 | 0.17128  |

|    |          |          |          |
|----|----------|----------|----------|
| C  | 1.42989  | 3.44404  | -0.68846 |
| H  | 2.49796  | 0.84293  | -0.88947 |
| H  | 3.47608  | 0.93515  | 0.5628   |
| H  | 2.89741  | 3.32044  | 0.87789  |
| H  | 3.56886  | 3.08356  | -0.7366  |
| H  | -0.68175 | 1.49924  | 1.26524  |
| H  | -0.70146 | 3.51193  | -0.25642 |
| H  | 0.35294  | 3.5717   | 1.15242  |
| H  | 1.29472  | 3.08157  | -1.71987 |
| H  | 1.51372  | 4.53789  | -0.76322 |
| H  | 1.51272  | 1.52251  | 1.92216  |
| C  | -0.7098  | 0.89152  | -0.73047 |
| H  | -1.48983 | 1.61159  | -1.04777 |
| O  | -1.40471 | -0.28096 | -0.23048 |
| Li | -0.39376 | -1.61582 | 0.64405  |
| C  | 0.04355  | 0.45657  | -1.96938 |
| H  | 0.77336  | -0.33263 | -1.73508 |
| H  | -0.67008 | 0.0518   | -2.70006 |
| H  | 0.57258  | 1.29404  | -2.43777 |
| C  | 1.30678  | -0.50604 | 1.26384  |
| C  | 0.92653  | -0.85551 | 2.51329  |
| H  | 0.71083  | -0.12274 | 3.30728  |
| H  | 0.88391  | -1.90234 | 2.84031  |
| Si | -3.07648 | -0.28868 | 0.00703  |
| C  | -3.31635 | -1.96818 | 0.80992  |
| H  | -4.37342 | -2.1765  | 1.01787  |
| H  | -2.95402 | -2.78189 | 0.16445  |
| H  | -2.79484 | -2.02538 | 1.77896  |
| C  | -3.93408 | -0.14764 | -1.6489  |
| H  | -3.66261 | 0.78522  | -2.16121 |
| H  | -3.65709 | -0.98152 | -2.3066  |
| H  | -5.02617 | -0.15294 | -1.53783 |
| C  | -3.56261 | 1.09543  | 1.16856  |
| H  | -4.64269 | 1.08304  | 1.36587  |
| H  | -3.04376 | 0.9929   | 2.1315   |
| H  | -3.31503 | 2.08442  | 0.75944  |
| C  | 2.39965  | -3.25262 | -1.25537 |
| H  | 3.49425  | -3.2194  | -1.38693 |

H 2.14923 -4.26547 -0.90398  
H 1.95092 -3.13191 -2.25409  
Cu 1.89808 -1.8747 -0.02622

-----  
**G**

$G_{\text{sol}} = -882.181018$  Hartree

-----  
C 2.99348 -0.84582 0.20381  
C 3.82154 0.23778 -0.4768  
C 3.13165 0.74965 -1.73404  
C 1.7259 1.23769 -1.41183  
C 0.88891 0.14108 -0.7421  
C 1.57879 -0.37361 0.53558  
H 3.7201 1.55108 -2.20451  
H 3.95809 1.0809 0.22323  
H 4.8293 -0.13584 -0.71221  
H 2.92439 -1.72885 -0.4547  
H 3.50268 -1.18076 1.11943  
H 1.79988 2.11148 -0.73846  
H 1.21302 1.59029 -2.32052  
H 0.85792 -0.71743 -1.44088  
H 1.66991 0.47489 1.23982  
H 3.06826 -0.068 -2.47308  
C 0.72824 -1.45489 1.23738  
O 0.53043 -2.55016 0.44792  
Li 0.29319 -3.85046 -0.47526  
C 1.32092 -1.85045 2.58868  
H 0.62235 -2.51391 3.11541  
H 2.26124 -2.40404 2.45492  
H 1.51789 -0.97718 3.23  
H -0.2466 -0.95727 1.46362  
C -0.53418 0.59974 -0.52343  
C -1.53381 -0.03974 -1.14383  
H -1.34477 -0.90317 -1.79039  
H -2.5821 0.24717 -1.04109  
Si -1.00593 2.11606 0.50859  
C -2.74348 1.85984 1.19646  
H -2.9976 2.67301 1.89031

H -3.51102 1.84699 0.4116  
H -2.81093 0.91226 1.74803  
C -1.02158 3.65017 -0.5917  
H -1.66591 3.49036 -1.46695  
H -1.41018 4.51875 -0.0416  
H -0.01933 3.90712 -0.95907  
C 0.12695 2.44976 1.98023  
H 1.16054 2.67621 1.68744  
H -0.25809 3.32205 2.52853  
H 0.15077 1.60384 2.68056

-----  
**Gc**

$G_{\text{sol}} = -1119.446083$  Hartree

-----  
C -3.78067 -0.63495 2.82791  
C -2.60559 -1.05957 3.70673  
C -1.29994 -0.38755 3.29959  
C -1.45604 1.12597 3.20028  
C -2.61586 1.48054 2.26096  
C -3.92947 0.88778 2.80937  
H -0.49782 -0.64945 4.0047  
H -2.83753 -0.78632 4.75088  
H -2.49176 -2.15336 3.69342  
H -3.64165 -0.99981 1.79475  
H -4.69624 -1.1103 3.2063  
H -1.64339 1.55503 4.20144  
H -0.52634 1.58542 2.83067  
H -2.40792 0.94191 1.31445  
H -4.02722 1.20144 3.86678  
H -0.98573 -0.77152 2.31398  
C -5.19254 1.42826 2.09585  
O -5.04646 1.54286 0.72556  
Li -5.39008 1.69495 -0.94079  
C -6.43898 0.6221 2.43288  
H -7.32628 1.13723 2.04193  
H -6.3969 -0.37285 1.96798  
H -6.56875 0.49335 3.51815  
H -5.36496 2.44017 2.52713



|    |          |         |          |
|----|----------|---------|----------|
| C  | -2.63341 | 2.96127 | 1.91417  |
| C  | -1.80663 | 3.39627 | 0.88664  |
| H  | -1.13189 | 2.708   | 0.3643   |
| H  | -1.59901 | 4.45474 | 0.71463  |
| Si | -3.33518 | 4.34615 | 3.02082  |
| C  | -4.64396 | 5.30273 | 2.06071  |
| H  | -5.04456 | 6.13203 | 2.66034  |
| H  | -4.21746 | 5.72888 | 1.14123  |
| H  | -5.48426 | 4.65789 | 1.76697  |
| C  | -1.90844 | 5.5076  | 3.44222  |
| H  | -1.48963 | 5.99965 | 2.5547   |
| H  | -2.24152 | 6.29503 | 4.13258  |
| H  | -1.09377 | 4.95492 | 3.93134  |
| C  | -4.03441 | 3.76506 | 4.67322  |
| H  | -3.29867 | 3.18062 | 5.24207  |
| H  | -4.27744 | 4.65354 | 5.27422  |
| H  | -4.9485  | 3.16549 | 4.58276  |
| C  | -4.07337 | 3.13027 | -1.8478  |
| H  | -3.91639 | 2.2572  | -2.51419 |
| H  | -3.36989 | 3.88021 | -2.22986 |
| H  | -5.07026 | 3.5504  | -2.09704 |
| Cu | -3.62491 | 2.91329 | 0.10339  |

-----  
**Gp**

$G_{\text{sol}} = -1119.456000$  Hartree  
 -----

|   |          |         |          |
|---|----------|---------|----------|
| C | -0.44943 | 2.86949 | 0.9046   |
| C | 0.11122  | 4.01789 | 0.07856  |
| C | 1.573    | 3.76775 | -0.2616  |
| C | 1.72048  | 2.44248 | -0.9923  |
| C | 1.18261  | 1.25672 | -0.17895 |
| C | -0.29246 | 1.50805 | 0.2144   |
| H | 1.97641  | 4.59056 | -0.86876 |
| H | -0.46759 | 4.11038 | -0.85663 |
| H | -0.01327 | 4.96677 | 0.61945  |
| H | 0.07209  | 2.84817 | 1.87769  |
| H | -1.51468 | 3.04624 | 1.12929  |
| H | 1.18189  | 2.50263 | -1.95276 |

|    |          |          |          |
|----|----------|----------|----------|
| H  | 2.77214  | 2.24304  | -1.24428 |
| H  | 1.7558   | 1.24679  | 0.76801  |
| H  | -0.88196 | 1.5411   | -0.7218  |
| H  | 2.16557  | 3.74469  | 0.66913  |
| C  | -0.94783 | 0.43882  | 1.10238  |
| O  | -1.29422 | -0.74521 | 0.34795  |
| Li | 0.08432  | -1.68721 | -0.53857 |
| C  | -0.13941 | -0.00805 | 2.30125  |
| H  | -0.73681 | -0.68428 | 2.92621  |
| H  | 0.76814  | -0.54519 | 1.98661  |
| H  | 0.1655   | 0.84685  | 2.91722  |
| H  | -1.89777 | 0.87484  | 1.46894  |
| C  | 1.42579  | -0.06649 | -0.9019  |
| C  | 0.97438  | -0.19939 | -2.16946 |
| H  | 0.45699  | 0.5872   | -2.7401  |
| H  | 1.16183  | -1.11292 | -2.74888 |
| Si | -2.86001 | -1.02174 | -0.22295 |
| C  | -2.57482 | -2.48678 | -1.36176 |
| H  | -3.51325 | -2.8544  | -1.79574 |
| H  | -1.92824 | -2.21039 | -2.20948 |
| H  | -2.12184 | -3.33763 | -0.83051 |
| C  | -3.48251 | 0.46497  | -1.1712  |
| H  | -4.4897  | 0.27926  | -1.56745 |
| H  | -3.53864 | 1.36362  | -0.54187 |
| H  | -2.82335 | 0.69078  | -2.02069 |
| C  | -3.964   | -1.44143 | 1.22707  |
| H  | -3.95701 | -0.63861 | 1.97683  |
| H  | -5.006   | -1.58988 | 0.91542  |
| H  | -3.62549 | -2.36027 | 1.72274  |
| C  | 3.33281  | -2.91329 | 0.90965  |
| H  | 3.90773  | -3.5267  | 0.19825  |
| H  | 2.67922  | -3.59635 | 1.47428  |
| H  | 4.04994  | -2.48851 | 1.6315   |
| Cu | 2.42737  | -1.48786 | 0.01172  |

-----  
**ICuI'**

$G_{\text{sol}} = -220.485482$  Hartree  
 -----

Cu -1.3747 -0.49474 -0.10819  
I 1.08895 -0.49474 -0.10819  
I -3.83834 -0.49474 -0.10819

-----  
**Li<sup>+</sup>**

$G_{\text{sol}} = -7.472842$  Hartree

-----  
Li -1.82105 1.21053 0.

-----  
**MeCu**

$G_{\text{sol}} = -237.237824$  Hartree

-----  
Cu -1.61676 1.11231 -0.57562  
C -3.49513 1.11231 -0.57562  
H -3.83989 1.60063 0.34278  
H -3.83989 1.66351 -1.45771  
H -3.83989 0.0728 -0.61192

-----  
**MeLi**

$G_{\text{sol}} = -47.405685$  Hartree

-----  
C -0.94383 0.45864 0.  
H -0.60862 1.03461 0.87993  
H -0.60862 1.03461 -0.87993  
H -2.04553 0.5266 0.  
Li -0.28906 -1.39341 0.

-----  
**TSA**

$G_{\text{sol}} = -895.912962$  Hartree

-----  
C -1.433869 -0.855938 1.204344  
C -1.907576 -0.918539 2.632511  
C -1.929891 -1.712399 0.296185  
C -1.638591 -1.518470 -1.164382  
H -0.844253 -2.225075 -1.477704  
C -2.866917 -1.777276 -2.020170  
H -3.705404 -1.143681 -1.704218  
H -2.653091 -1.566490 -3.074987

H -3.180462 -2.826370 -1.933058  
O -1.147324 -0.206557 -1.364123  
Si -1.536387 1.104227 -0.118865  
C -3.398609 1.334638 -0.318814  
H -3.978997 0.702840 0.366679  
H -3.648837 2.381586 -0.094507  
H -3.726456 1.119687 -1.344075  
C -1.119822 2.107543 1.470129  
H -0.036352 2.118097 1.670087  
H -1.434595 3.153599 1.323294  
H -1.618484 1.725249 2.368948  
C -0.674758 2.365307 -1.320022  
H -1.169938 3.332044 -1.153015  
H 0.387430 2.558374 -1.088606  
H -0.789965 2.157727 -2.397282  
H -2.386117 -1.883360 2.863182  
H -1.098887 -0.757831 3.357515  
Cu 0.428117 -0.394703 0.814687  
I 2.672814 -0.070251 -0.209730  
Li 0.535248 0.339620 -1.891064  
H -2.654835 -0.133567 2.826181  
H -2.632808 -2.517950 0.552959

-----  
**TSB**

$G_{\text{sol}} = -895.902193$  Hartree

-----  
C 1.55799 0.75851 -1.19572  
C 1.86101 0.67134 -2.50346  
C 2.16672 1.83703 -0.34189  
H 3.26427 1.74492 -0.36648  
H 1.93254 2.8411 -0.72988  
C 1.67438 1.72273 1.1156  
H 2.51619 1.93868 1.79564  
C 0.54966 2.69807 1.41057  
H -0.27503 2.57577 0.69037  
H 0.15083 2.5493 2.4263  
H 0.90037 3.73647 1.34633  
O 1.23204 0.40474 1.39561

|    |          |          |          |
|----|----------|----------|----------|
| Li | -0.46927 | -0.10448 | 1.92256  |
| Si | 1.65975  | -1.03286 | 0.33372  |
| C  | 3.53843  | -1.07216 | 0.49364  |
| H  | 3.91777  | -0.39077 | 1.26555  |
| H  | 3.84194  | -2.09405 | 0.76405  |
| H  | 4.02479  | -0.83022 | -0.46035 |
| C  | 0.84658  | -2.14797 | 1.70242  |
| H  | -0.20477 | -2.40792 | 1.48537  |
| H  | 1.37339  | -3.11187 | 1.67784  |
| H  | 0.93435  | -1.78428 | 2.73914  |
| C  | 1.31254  | -2.28334 | -1.08744 |
| H  | 1.67398  | -3.27361 | -0.76538 |
| H  | 0.24262  | -2.39653 | -1.32279 |
| H  | 1.84157  | -2.01209 | -2.00901 |
| H  | 2.53353  | 1.38025  | -3.00434 |
| H  | 1.4579   | -0.11272 | -3.14607 |
| Cu | -0.29922 | 0.22647  | -0.8751  |
| I  | -2.55772 | -0.15656 | 0.10358  |

-----  
**TSC**

$G_{sol} = -924.270640$  Hartree

|    |          |          |          |
|----|----------|----------|----------|
| C  | -0.1733  | 0.81252  | -1.33325 |
| C  | 0.18187  | 0.88192  | -2.62738 |
| C  | -0.5376  | 2.08018  | -0.6023  |
| H  | 0.2287   | 2.85313  | -0.77763 |
| H  | -1.48269 | 2.49694  | -0.98677 |
| C  | -0.6812  | 1.8384   | 0.91646  |
| H  | -0.22808 | 2.68615  | 1.45844  |
| C  | -2.13515 | 1.71873  | 1.33763  |
| H  | -2.64209 | 0.93086  | 0.75644  |
| H  | -2.2169  | 1.48346  | 2.41018  |
| H  | -2.67849 | 2.65696  | 1.16512  |
| O  | 0.00071  | 0.66301  | 1.32853  |
| Li | -0.90701 | -0.9259  | 1.76533  |
| Si | 1.33641  | -0.11145 | 0.36574  |
| C  | 2.61446  | 1.27442  | 0.33449  |
| H  | 2.44406  | 2.02971  | 1.112    |

|    |          |          |          |
|----|----------|----------|----------|
| H  | 3.611    | 0.83689  | 0.49227  |
| H  | 2.63049  | 1.7739   | -0.64289 |
| C  | 1.61826  | -1.29989 | 1.86572  |
| H  | 1.11239  | -2.27362 | 1.73977  |
| H  | 2.68796  | -1.55165 | 1.89211  |
| H  | 1.37041  | -0.8797  | 2.85195  |
| C  | 1.99894  | -1.33255 | -0.96173 |
| H  | 2.96326  | -1.72842 | -0.6014  |
| H  | 1.33947  | -2.19466 | -1.14075 |
| H  | 2.16904  | -0.82556 | -1.91887 |
| H  | 0.19861  | 1.82377  | -3.19339 |
| H  | 0.47105  | -0.00213 | -3.1988  |
| Cu | -0.95468 | -0.86532 | -0.66683 |
| C  | -1.86065 | -2.29966 | 0.31942  |
| H  | -2.69074 | -2.01811 | 1.0009   |
| H  | -2.35955 | -2.88617 | -0.46504 |
| H  | -1.23359 | -3.03801 | 0.85527  |

-----  
**TSD**

$G_{sol} = -963.526726$  Hartree

|   |           |           |           |
|---|-----------|-----------|-----------|
| C | -0.998884 | -1.649310 | 2.126683  |
| H | -0.667569 | -2.399732 | 2.857779  |
| H | -1.992564 | -1.239208 | 2.306124  |
| C | -0.232034 | -1.282626 | 1.084900  |
| C | 1.105240  | -1.975889 | 0.931839  |
| H | 1.001830  | -2.767749 | 0.167334  |
| H | 1.381297  | -2.495249 | 1.867519  |
| C | 2.250798  | -1.075126 | 0.492897  |
| H | 3.160560  | -1.683757 | 0.372882  |
| H | 2.484486  | -0.322106 | 1.260704  |
| C | 1.987395  | -0.375373 | -0.828143 |
| H | 1.629500  | -1.149884 | -1.542105 |
| C | 3.249614  | 0.255779  | -1.387442 |
| H | 4.023925  | -0.500805 | -1.571216 |
| H | 3.046216  | 0.775793  | -2.332967 |
| H | 3.646412  | 0.994739  | -0.677267 |
| C | -0.586024 | 2.675875  | -0.616873 |

|    |           |           |           |
|----|-----------|-----------|-----------|
| H  | 0.176870  | 2.968739  | -1.355329 |
| H  | -1.564676 | 2.557910  | -1.115645 |
| H  | -0.719029 | 3.548816  | 0.037541  |
| C  | -1.837962 | 1.303398  | 1.490639  |
| H  | -2.684904 | 0.837182  | 0.965964  |
| H  | -1.772394 | 0.866940  | 2.493891  |
| H  | -2.072632 | 2.374055  | 1.600658  |
| C  | 1.052020  | 1.736447  | 1.903835  |
| H  | 0.638030  | 2.639293  | 2.377486  |
| H  | 1.153616  | 0.977247  | 2.690267  |
| H  | 2.049410  | 1.977912  | 1.515512  |
| Si | -0.150606 | 1.182023  | 0.559984  |
| O  | 0.996247  | 0.644457  | -0.761448 |
| Li | -0.281490 | 0.816154  | -2.116196 |
| Cu | -1.219738 | -0.861050 | -0.562309 |
| C  | -1.981162 | -0.537381 | -2.339820 |
| H  | -1.347653 | -0.768957 | -3.221128 |
| H  | -2.800383 | -1.266288 | -2.410493 |
| H  | -2.468974 | 0.438379  | -2.531255 |

-----  
**TSE**

$G_{sol} = -1115.860260$  Hartree  
 -----

|    |          |          |          |
|----|----------|----------|----------|
| C  | -3.81773 | -0.84213 | -0.69325 |
| C  | -2.52736 | -1.00628 | -1.1709  |
| C  | -1.38983 | -0.57648 | -0.45575 |
| C  | -1.62412 | 0.09484  | 0.76939  |
| C  | -2.92802 | 0.24636  | 1.24338  |
| C  | -4.02641 | -0.22389 | 0.5361   |
| H  | -4.66426 | -1.18862 | -1.28499 |
| H  | -2.37414 | -1.45689 | -2.15111 |
| H  | -3.08556 | 0.77321  | 2.18796  |
| H  | -5.03269 | -0.08089 | 0.92591  |
| C  | -0.0664  | -0.63981 | -1.09362 |
| C  | 0.21369  | -1.72299 | -1.89494 |
| H  | -0.46757 | -2.57533 | -2.06071 |
| H  | 1.07432  | -1.71149 | -2.58085 |
| Si | 0.81861  | 1.88289  | -0.51951 |

|    |          |          |          |
|----|----------|----------|----------|
| C  | 2.3817   | 1.32398  | -1.41331 |
| H  | 2.12428  | 0.84242  | -2.36442 |
| H  | 3.04826  | 2.17637  | -1.60953 |
| H  | 2.96216  | 0.57557  | -0.84972 |
| C  | -0.69146 | 2.29523  | -1.56261 |
| H  | -1.62157 | 2.22581  | -0.9826  |
| H  | -0.59978 | 3.33333  | -1.91276 |
| H  | -0.7946  | 1.62814  | -2.42516 |
| C  | 1.27313  | 3.56815  | 0.23678  |
| H  | 1.47692  | 4.31954  | -0.54009 |
| H  | 0.45073  | 3.9556   | 0.85696  |
| H  | 2.16426  | 3.5087   | 0.87881  |
| C  | -0.54821 | 0.71002  | 1.64351  |
| H  | -0.95649 | 1.65708  | 2.04555  |
| C  | -0.21016 | -0.19838 | 2.81744  |
| H  | -1.0915  | -0.38109 | 3.44287  |
| H  | 0.13225  | -1.18173 | 2.45558  |
| H  | 0.56305  | 0.25667  | 3.4576   |
| O  | 0.67397  | 1.02535  | 0.98937  |
| Cu | 1.43571  | -1.81691 | -0.23813 |
| C  | 2.82842  | -2.11848 | 1.10633  |
| H  | 3.75131  | -1.50448 | 1.06623  |
| H  | 2.53077  | -2.19407 | 2.16994  |
| H  | 3.17741  | -3.12874 | 0.85134  |
| Li | 2.05889  | -0.15315 | 1.34584  |

-----  
**TSF**

$G_{sol} = -1119.395002$  Hartree  
 -----

|   |         |          |          |
|---|---------|----------|----------|
| C | 3.62041 | -0.09582 | -0.67828 |
| C | 2.29425 | 0.64113  | -0.54223 |
| C | 1.11115 | -0.23561 | -0.9855  |
| C | 1.06444 | -1.59309 | -0.24008 |
| C | 2.44034 | -2.2777  | -0.2518  |
| C | 3.61725 | -1.38311 | 0.13407  |
| H | 2.16118 | 0.97686  | 0.50119  |
| H | 2.30404 | 1.55524  | -1.15464 |
| H | 3.78576 | -0.33587 | -1.74263 |

|    |          |          |          |
|----|----------|----------|----------|
| H  | 4.45332  | 0.55169  | -0.36913 |
| H  | 0.41383  | -2.23849 | -0.85523 |
| H  | 2.41401  | -3.17871 | 0.38269  |
| H  | 2.62184  | -2.63867 | -1.2776  |
| H  | 3.58605  | -1.12598 | 1.20344  |
| H  | 4.55597  | -1.93546 | -0.01647 |
| H  | 1.34978  | -0.5099  | -2.03628 |
| C  | 0.39567  | -1.64936 | 1.14928  |
| H  | 0.23908  | -2.72747 | 1.353    |
| O  | -0.88185 | -1.01909 | 1.16387  |
| Li | -0.86238 | 0.84309  | 1.41112  |
| C  | 1.15913  | -1.0866  | 2.33581  |
| H  | 1.43064  | -0.02802 | 2.1974   |
| H  | 0.53074  | -1.17021 | 3.23253  |
| H  | 2.08483  | -1.64012 | 2.52934  |
| C  | -0.22876 | 0.50001  | -1.00191 |
| C  | -0.36565 | 1.46693  | -1.97223 |
| H  | 0.38981  | 1.6658   | -2.75088 |
| H  | -1.34548 | 1.92008  | -2.18681 |
| Si | -2.02145 | -1.02915 | -0.16448 |
| C  | -3.18015 | 0.44475  | 0.11067  |
| H  | -4.17541 | 0.1596   | -0.2608  |
| H  | -3.32752 | 0.63021  | 1.18949  |
| H  | -2.89434 | 1.38792  | -0.37139 |
| C  | -3.08255 | -2.45204 | 0.55027  |
| H  | -2.49044 | -3.37609 | 0.64228  |
| H  | -3.45922 | -2.21243 | 1.55502  |
| H  | -3.94832 | -2.68578 | -0.08757 |
| C  | -1.86556 | -1.71077 | -1.93246 |
| H  | -2.87517 | -1.60302 | -2.36148 |
| H  | -1.15873 | -1.22526 | -2.60971 |
| H  | -1.66056 | -2.7904  | -1.90009 |
| C  | -0.35701 | 3.07841  | 1.69044  |
| H  | -0.22694 | 4.16881  | 1.63794  |
| H  | -1.33189 | 2.94621  | 2.19975  |
| H  | 0.42775  | 2.7296   | 2.38636  |
| Cu | -0.20955 | 2.42785  | -0.13962 |

**TSG**

$G_{\text{sol}} = -1119.398782$  Hartree

-----

|    |          |          |          |
|----|----------|----------|----------|
| C  | 3.05274  | 0.19015  | 1.20123  |
| C  | 4.09307  | -0.10954 | 0.13386  |
| C  | 3.65039  | -1.31004 | -0.68894 |
| C  | 2.27848  | -1.07825 | -1.30771 |
| C  | 1.19348  | -0.70587 | -0.28569 |
| C  | 1.67812  | 0.47399  | 0.59112  |
| H  | 4.38493  | -1.539   | -1.47437 |
| H  | 4.20987  | 0.76713  | -0.52555 |
| H  | 5.07442  | -0.29068 | 0.59467  |
| H  | 2.9845   | -0.68426 | 1.87129  |
| H  | 3.36287  | 1.04137  | 1.82869  |
| H  | 2.34644  | -0.26819 | -2.0563  |
| H  | 1.97245  | -1.97759 | -1.85891 |
| H  | 1.09155  | -1.57565 | 0.39744  |
| H  | 1.81367  | 1.34512  | -0.0784  |
| H  | 3.60851  | -2.19728 | -0.03354 |
| C  | 0.7115   | 0.93141  | 1.69222  |
| O  | -0.58455 | 1.26546  | 1.21069  |
| Li | -1.71848 | -0.23113 | 1.07137  |
| C  | 0.51385  | -0.07372 | 2.8165   |
| H  | -0.23986 | 0.30723  | 3.51863  |
| H  | 0.17722  | -1.05398 | 2.43883  |
| H  | 1.43586  | -0.24612 | 3.38335  |
| H  | 1.15072  | 1.84759  | 2.13265  |
| C  | -0.19151 | -0.445   | -0.89589 |
| C  | -0.55392 | -1.12091 | -2.04013 |
| H  | 0.09883  | -1.77106 | -2.63863 |
| H  | -1.48084 | -0.84558 | -2.567   |
| Si | -0.97347 | 1.89817  | -0.37211 |
| C  | -2.78695 | 1.40756  | -0.64043 |
| H  | -3.2573  | 2.19033  | -1.25255 |
| H  | -2.96082 | 0.44561  | -1.14134 |
| H  | -3.34816 | 1.42113  | 0.31056  |
| C  | 0.02654  | 2.15829  | -1.9716  |
| H  | -0.60676 | 1.81287  | -2.80167 |

|    |          |          |          |
|----|----------|----------|----------|
| H  | 0.23351  | 3.22835  | -2.11305 |
| H  | 0.96865  | 1.60823  | -2.0575  |
| C  | -1.1353  | 3.70819  | 0.2077   |
| H  | -0.15524 | 4.10345  | 0.51887  |
| H  | -1.5052  | 4.36383  | -0.59484 |
| H  | -1.81041 | 3.80686  | 1.06914  |
| C  | -2.641   | -2.38378 | 1.12681  |
| H  | -3.15753 | -3.32967 | 0.90949  |
| H  | -3.46083 | -1.67804 | 1.36821  |
| H  | -2.08049 | -2.56508 | 2.06052  |
| Cu | -1.55957 | -1.97655 | -0.43723 |

-----

## X-ray Structure Determination of Compound 26

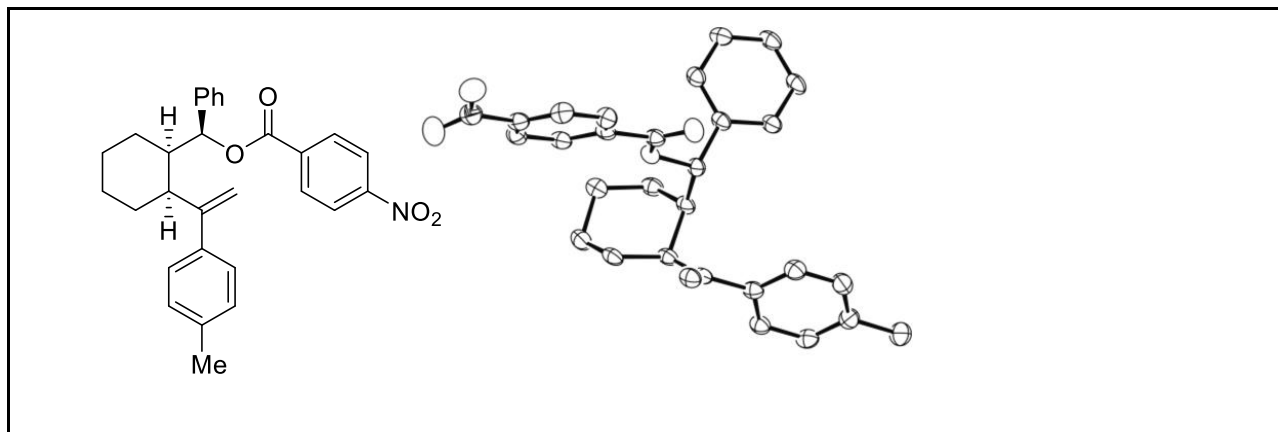

Compound 26,  $C_{29}H_{29}NO_4$ , crystallizes in the triclinic space group  $P\bar{1}$  with  $a=9.4816(6)\text{\AA}$ ,  $b=10.0759(6)\text{\AA}$ ,  $c=13.0176(8)\text{\AA}$ ,  $\alpha=83.550(3)^\circ$ ,  $\beta=89.861(3)^\circ$ ,  $\gamma=84.338(3)^\circ$ ,  $V=1229.70(13)\text{\AA}^3$ ,  $Z=2$ , and  $d_{\text{calc}}=1.230\text{ g/cm}^3$ . X-ray intensity data were collected on a Bruker APEXII [1] CCD area detector employing graphite-monochromated Mo-K $\alpha$  radiation ( $\lambda=0.71073\text{\AA}$ ) at a temperature of 100K. Preliminary indexing was performed from a series of thirty-six  $0.5^\circ$  rotation frames with exposures of 10 seconds. A total of 3702 frames were collected with a crystal to detector distance of 37.6 mm, rotation widths of  $0.5^\circ$  and exposures of 15 seconds:

| scan type | $2\theta$ | $\omega$ | $\phi$  | $\chi$ | Frames |
|-----------|-----------|----------|---------|--------|--------|
| $\phi$    | -15.50    | 258.48   | -351.72 | 19.46  | 739    |
| $\omega$  | -15.50    | -82.24   | 18.69   | 41.79  | 142    |
| $\phi$    | -23.00    | -25.79   | -280.64 | 73.66  | 658    |
| $\phi$    | -23.00    | 315.83   | -339.66 | 28.88  | 720    |
| $\phi$    | 19.50     | 59.55    | -5.19   | -26.26 | 721    |
| $\phi$    | -18.00    | -6.31    | -48.02  | -86.54 | 722    |

Rotation frames were integrated using SAINT [2], producing a listing of unaveraged  $F^2$  and  $\sigma(F^2)$  values. A total of 40564 reflections were measured over the ranges  $3.148 \leq 2\theta \leq 51.002^\circ$ ,  $-11 \leq h \leq 11$ ,  $-12 \leq k \leq 12$ ,  $-15 \leq l \leq 15$  yielding 4518 unique reflections ( $R_{\text{int}} = 0.0561$ ). The intensity data were corrected for Lorentz and polarization effects and for absorption using SADABS [3] (minimum and maximum transmission 0.4859, 0.7452). The structure was solved by direct methods - SHELXS-97 [4]. Refinement

was by full-matrix least squares based on  $F^2$  using SHELXL-2014 [5]. All reflections were used during refinement. The weighting scheme used was  $w=1/[\sigma^2(F_o^2) + (0.0341P)^2 + 1.7278P]$  where  $P = (F_o^2 + 2F_c^2)/3$ . Non-hydrogen atoms were refined anisotropically and hydrogen atoms were refined using a riding model. Refinement converged to  $R1=0.0581$  and  $wR2=0.1409$  for 3648 observed reflections for which  $F > 4\sigma(F)$  and  $R1=0.0711$  and  $wR2=0.1474$  and  $GOF = 1.135$  for all 4518 unique, non-zero reflections and 308 variables. The maximum  $\Delta/\sigma$  in the final cycle of least squares was 0.000 and the two most prominent peaks in the final difference Fourier were  $+0.59$  and  $-0.30 e/\text{\AA}^3$ .

Table 1. lists cell information, data collection parameters, and refinement data. Final positional and equivalent isotropic thermal parameters are given in Tables 2. and 3. Anisotropic thermal parameters are in Table 4. Tables 5. and 6. list bond distances and bond angles. Figure 1. is an ORTEP representation of the molecule with 50% probability thermal ellipsoids displayed.

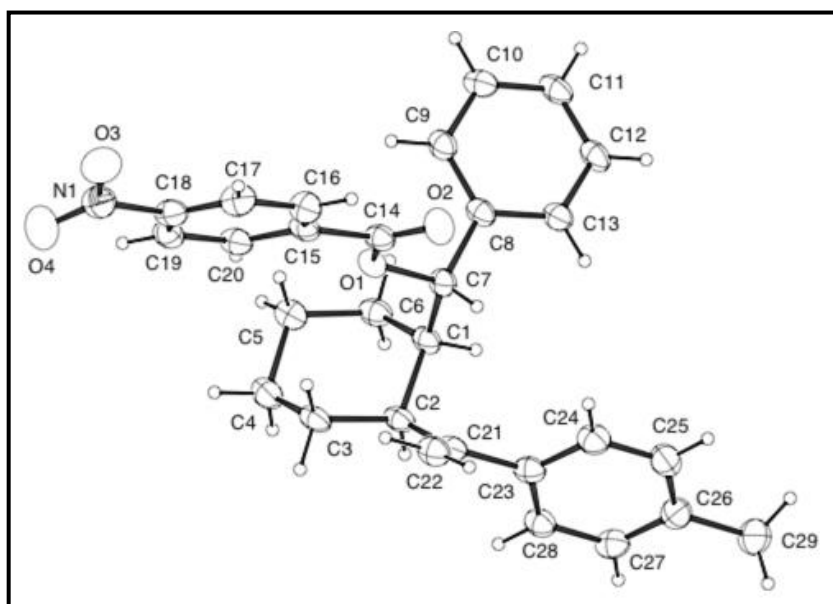

Figure 1. ORTEP drawing of the title compound with 50% thermal ellipsoids.



Table 1. Summary of Structure Determination of Compound 26

|                                                       |                                                   |
|-------------------------------------------------------|---------------------------------------------------|
| Empirical formula                                     | C <sub>29</sub> H <sub>29</sub> NO <sub>4</sub>   |
| Formula weight                                        | 455.53                                            |
| Temperature/K                                         | 100                                               |
| Crystal system                                        | triclinic                                         |
| Space group                                           | P $\bar{1}$                                       |
| a                                                     | 9.4816(6)Å                                        |
| b                                                     | 10.0759(6)Å                                       |
| c                                                     | 13.0176(8)Å                                       |
| $\alpha$                                              | 83.550(3)°                                        |
| $\beta$                                               | 89.861(3)°                                        |
| $\gamma$                                              | 84.338(3)°                                        |
| Volume                                                | 1229.70(13)Å <sup>3</sup>                         |
| Z                                                     | 2                                                 |
| d <sub>calc</sub>                                     | 1.230 g/cm <sup>3</sup>                           |
| $\mu$                                                 | 0.082 mm <sup>-1</sup>                            |
| F(000)                                                | 484.0                                             |
| Crystal size, mm                                      | 0.28 × 0.26 × 0.03                                |
| <b>2<math>\theta</math> range for data collection</b> | 3.148 - 51.002°                                   |
| Index ranges                                          | <b>-11 ≤ h ≤ 11, -12 ≤ k ≤ 12, -15 ≤ l ≤ 15</b>   |
| Reflections collected                                 | 40564                                             |
| Independent reflections                               | 4518[R(int) = 0.0561]                             |
| Data/restraints/parameters                            | 4518/0/308                                        |
| Goodness-of-fit on F <sup>2</sup>                     | 1.135                                             |
| Final R indexes [I ≥ 2σ (I)]                          | R <sub>1</sub> = 0.0581, wR <sub>2</sub> = 0.1409 |
| Final R indexes [all data]                            | R <sub>1</sub> = 0.0711, wR <sub>2</sub> = 0.1474 |
| Largest diff. peak/hole                               | 0.59/-0.30 eÅ <sup>-3</sup>                       |

Table 2 . Refined Positional Parameters for Compound 26

| Atom | x           | y           | z           | U(eq)     |
|------|-------------|-------------|-------------|-----------|
| O1   | 0.82864(18) | 0.74078(16) | 0.18570(13) | 0.0260(4) |
| O2   | 1.0591(2)   | 0.76740(19) | 0.15338(15) | 0.0357(5) |
| O3   | 1.2406(2)   | 0.2347(2)   | 0.52528(16) | 0.0448(5) |
| O4   | 1.0256(3)   | 0.1805(2)   | 0.52527(18) | 0.0526(6) |
| N1   | 1.1176(3)   | 0.2509(2)   | 0.49450(19) | 0.0371(6) |
| C1   | 0.6365(3)   | 0.8297(2)   | 0.0638(2)   | 0.0264(6) |
| C2   | 0.6255(3)   | 0.6992(2)   | 0.0110(2)   | 0.0268(6) |
| C3   | 0.6175(3)   | 0.5760(2)   | 0.0904(2)   | 0.0287(6) |
| C4   | 0.4945(3)   | 0.5970(3)   | 0.1644(2)   | 0.0342(6) |
| C5   | 0.5058(3)   | 0.7218(3)   | 0.2206(2)   | 0.0317(6) |
| C6   | 0.5179(3)   | 0.8465(3)   | 0.1429(2)   | 0.0299(6) |
| C7   | 0.7862(3)   | 0.8462(2)   | 0.1017(2)   | 0.0258(5) |
| C8   | 0.7959(3)   | 0.9836(2)   | 0.1358(2)   | 0.0257(5) |
| C9   | 0.7923(3)   | 1.0081(3)   | 0.2390(2)   | 0.0282(6) |
| C10  | 0.7944(3)   | 1.1387(3)   | 0.2645(2)   | 0.0311(6) |
| C11  | 0.7971(3)   | 1.2444(3)   | 0.1878(2)   | 0.0316(6) |
| C12  | 0.8023(3)   | 1.2214(2)   | 0.0847(2)   | 0.0307(6) |
| C13  | 0.8034(3)   | 1.0913(3)   | 0.0589(2)   | 0.0282(6) |
| C14  | 0.9699(3)   | 0.7102(2)   | 0.1998(2)   | 0.0267(6) |
| C15  | 1.0025(3)   | 0.5903(2)   | 0.2790(2)   | 0.0264(6) |
| C16  | 1.1445(3)   | 0.5434(3)   | 0.2946(2)   | 0.0321(6) |
| C17  | 1.1832(3)   | 0.4306(3)   | 0.3643(2)   | 0.0338(6) |
| C18  | 1.0773(3)   | 0.3677(3)   | 0.4169(2)   | 0.0313(6) |
| C19  | 0.9349(3)   | 0.4118(3)   | 0.4027(2)   | 0.0317(6) |
| C20  | 0.8987(3)   | 0.5243(3)   | 0.3329(2)   | 0.0288(6) |
| C21  | 0.7383(3)   | 0.6860(2)   | -0.0707(2)  | 0.0266(6) |
| C22  | 0.8513(3)   | 0.5963(3)   | -0.0598(2)  | 0.0310(6) |
| C23  | 0.7210(3)   | 0.7865(3)   | -0.1645(2)  | 0.0268(6) |
| C24  | 0.8295(3)   | 0.8649(3)   | -0.1973(2)  | 0.0324(6) |
| C25  | 0.8141(3)   | 0.9565(3)   | -0.2852(2)  | 0.0358(6) |
| C26  | 0.6909(3)   | 0.9721(3)   | -0.3442(2)  | 0.0319(6) |
| C27  | 0.5831(3)   | 0.8942(3)   | -0.3118(2)  | 0.0316(6) |
| C28  | 0.5963(3)   | 0.8033(3)   | -0.2235(2)  | 0.0291(6) |
| C29  | 0.6736(3)   | 1.0714(3)   | -0.4405(2)  | 0.0404(7) |

Table 3 . Positional Parameters for Hydrogens in Compound 26

| Atom | x      | y      | z       | U(eq) |
|------|--------|--------|---------|-------|
| H1   | 0.615  | 0.9037 | 0.0089  | 0.035 |
| H2   | 0.5345 | 0.7123 | -0.0262 | 0.036 |
| H3a  | 0.6057 | 0.4983 | 0.0547  | 0.038 |
| H3b  | 0.7056 | 0.5585 | 0.1295  | 0.038 |
| H4a  | 0.4941 | 0.5186 | 0.2149  | 0.045 |
| H4b  | 0.4058 | 0.6072 | 0.126   | 0.045 |
| H5a  | 0.4226 | 0.7364 | 0.263   | 0.042 |
| H5b  | 0.5884 | 0.7072 | 0.2657  | 0.042 |
| H6a  | 0.4284 | 0.869  | 0.106   | 0.04  |
| H6b  | 0.5341 | 0.9213 | 0.1807  | 0.04  |
| H7   | 0.8518 | 0.8356 | 0.0442  | 0.034 |
| H9   | 0.7884 | 0.9373 | 0.291   | 0.038 |
| H10  | 0.794  | 1.1545 | 0.3335  | 0.041 |
| H11  | 0.7955 | 1.3316 | 0.2052  | 0.042 |
| H12  | 0.805  | 1.2928 | 0.0331  | 0.041 |
| H13  | 0.8091 | 1.0756 | -0.0101 | 0.038 |
| H16  | 1.214  | 0.5877 | 0.2583  | 0.043 |
| H17  | 1.2779 | 0.3984 | 0.3751  | 0.045 |
| H19  | 0.8656 | 0.3672 | 0.4389  | 0.042 |
| H20  | 0.8037 | 0.5559 | 0.3221  | 0.038 |
| H22a | 0.9202 | 0.5959 | -0.1107 | 0.041 |
| H22b | 0.8614 | 0.5341 | -0.0012 | 0.041 |
| H24  | 0.9137 | 0.8556 | -0.1595 | 0.043 |
| H25  | 0.8876 | 1.0082 | -0.305  | 0.048 |
| H27  | 0.4996 | 0.9032 | -0.3505 | 0.042 |
| H28  | 0.5216 | 0.7531 | -0.2032 | 0.039 |
| H29a | 0.6941 | 1.0254 | -0.5003 | 0.061 |
| H29b | 0.7378 | 1.1389 | -0.4372 | 0.061 |
| H29c | 0.578  | 1.1131 | -0.445  | 0.061 |

Table 4 . Refined Thermal Parameters (U's) for Compound 26

| Atom | U <sub>11</sub> | U <sub>22</sub> | U <sub>33</sub> | U <sub>23</sub> | U <sub>13</sub> | U <sub>12</sub> |
|------|-----------------|-----------------|-----------------|-----------------|-----------------|-----------------|
|------|-----------------|-----------------|-----------------|-----------------|-----------------|-----------------|

|     |            |            |            |             |             |             |
|-----|------------|------------|------------|-------------|-------------|-------------|
| O1  | 0.0279(9)  | 0.0171(8)  | 0.0321(10) | -0.0001(7)  | -0.0080(7)  | -0.0005(7)  |
| O2  | 0.030(1)   | 0.0333(11) | 0.0421(11) | 0.0055(9)   | -0.0040(9)  | -0.0045(9)  |
| O3  | 0.0491(13) | 0.0368(12) | 0.0446(12) | -0.0022(9)  | -0.0166(10) | 0.0131(10)  |
| O4  | 0.0600(15) | 0.0364(12) | 0.0570(15) | 0.0131(11)  | -0.0091(12) | -0.0032(11) |
| N1  | 0.0478(16) | 0.0246(12) | 0.0372(14) | -0.0036(10) | -0.0074(12) | 0.0045(11)  |
| C1  | 0.0315(14) | 0.0152(12) | 0.0316(14) | -0.0008(10) | -0.0074(11) | -0.0004(10) |
| C2  | 0.0286(13) | 0.0182(12) | 0.0333(14) | -0.0033(10) | -0.0109(11) | -0.0012(10) |
| C3  | 0.0313(14) | 0.0175(12) | 0.0377(15) | -0.0051(11) | -0.0092(11) | -0.0024(10) |
| C4  | 0.0356(15) | 0.0258(14) | 0.0413(16) | -0.0012(12) | -0.0069(12) | -0.0068(12) |
| C5  | 0.0303(14) | 0.0289(14) | 0.0365(15) | -0.0059(12) | -0.0019(11) | -0.0038(11) |
| C6  | 0.0297(14) | 0.0237(13) | 0.0364(15) | -0.0068(11) | -0.0079(11) | 0.0008(11)  |
| C7  | 0.0309(14) | 0.0181(12) | 0.0272(13) | 0.0006(10)  | -0.0063(10) | 0.000(1)    |
| C8  | 0.0248(13) | 0.0181(12) | 0.0338(14) | -0.0019(10) | -0.0059(10) | -0.0002(10) |
| C9  | 0.0294(14) | 0.0213(13) | 0.0330(14) | 0.0003(11)  | -0.0053(11) | -0.0016(11) |
| C10 | 0.0325(14) | 0.0265(14) | 0.0354(15) | -0.0090(11) | -0.0065(11) | -0.0015(11) |
| C11 | 0.0338(15) | 0.0169(12) | 0.0443(16) | -0.0057(11) | -0.0075(12) | -0.0008(11) |
| C12 | 0.0326(14) | 0.0162(12) | 0.0421(16) | 0.0019(11)  | -0.0093(12) | -0.0018(11) |
| C13 | 0.0293(14) | 0.0228(13) | 0.0325(14) | -0.0025(11) | -0.0076(11) | -0.0034(11) |
| C14 | 0.0291(14) | 0.0211(12) | 0.0298(14) | -0.0046(10) | -0.0065(11) | 0.0000(11)  |
| C15 | 0.0314(14) | 0.0171(12) | 0.0311(14) | -0.0065(10) | -0.0058(11) | 0.0002(10)  |
| C16 | 0.0306(14) | 0.0293(14) | 0.0355(15) | -0.0026(12) | -0.0038(12) | 0.0009(12)  |
| C17 | 0.0327(15) | 0.0317(15) | 0.0355(15) | -0.0052(12) | -0.0071(12) | 0.0071(12)  |
| C18 | 0.0427(16) | 0.0199(13) | 0.0302(14) | -0.0049(11) | -0.0113(12) | 0.0050(11)  |
| C19 | 0.0400(16) | 0.0219(13) | 0.0338(15) | -0.0047(11) | -0.0054(12) | -0.0042(12) |
| C20 | 0.0300(14) | 0.0230(13) | 0.0335(14) | -0.0063(11) | -0.0096(11) | 0.0007(11)  |
| C21 | 0.0284(13) | 0.0200(12) | 0.0321(14) | -0.0061(10) | -0.0089(11) | -0.0023(10) |
| C22 | 0.0325(14) | 0.0228(13) | 0.0371(15) | -0.0045(11) | -0.0068(12) | 0.0016(11)  |
| C23 | 0.0278(13) | 0.0221(13) | 0.0304(14) | -0.0069(10) | -0.0047(11) | 0.0024(10)  |
| C24 | 0.0291(14) | 0.0321(15) | 0.0355(15) | -0.0029(12) | -0.0084(11) | -0.0017(12) |
| C25 | 0.0382(16) | 0.0309(15) | 0.0388(16) | -0.0018(12) | -0.0014(13) | -0.0079(12) |
| C26 | 0.0377(15) | 0.0263(14) | 0.0305(14) | -0.0032(11) | -0.0006(12) | 0.0018(12)  |
| C27 | 0.0327(14) | 0.0290(14) | 0.0321(15) | -0.0053(11) | -0.0099(11) | 0.0045(12)  |
| C28 | 0.0297(14) | 0.0233(13) | 0.0342(15) | -0.0046(11) | -0.0044(11) | -0.0013(11) |
| C29 | 0.0490(18) | 0.0317(15) | 0.0380(16) | 0.0024(13)  | -0.0074(14) | 0.0010(13)  |

Table 5 . Bond Distances in Compound 26, Å

|       |          |        |          |        |          |
|-------|----------|--------|----------|--------|----------|
| O1-C7 | 1.464(3) | O1-C14 | 1.353(3) | O2-C14 | 1.195(3) |
| O3-N1 | 1.224(3) | O4-N1  | 1.217(3) | N1-C18 | 1.483(3) |

|         |          |         |          |         |          |
|---------|----------|---------|----------|---------|----------|
| C1-C2   | 1.563(3) | C1-C6   | 1.533(4) | C1-C7   | 1.534(3) |
| C2-C3   | 1.532(3) | C2-C21  | 1.513(4) | C3-C4   | 1.524(4) |
| C4-C5   | 1.537(4) | C5-C6   | 1.535(4) | C7-C8   | 1.512(3) |
| C8-C9   | 1.392(4) | C8-C13  | 1.398(4) | C9-C10  | 1.395(4) |
| C10-C11 | 1.378(4) | C11-C12 | 1.387(4) | C12-C13 | 1.388(4) |
| C14-C15 | 1.506(3) | C15-C16 | 1.390(4) | C15-C20 | 1.387(4) |
| C16-C17 | 1.392(4) | C17-C18 | 1.379(4) | C18-C19 | 1.385(4) |
| C19-C20 | 1.387(4) | C21-C22 | 1.328(4) | C21-C23 | 1.495(4) |
| C23-C24 | 1.395(4) | C23-C28 | 1.398(4) | C24-C25 | 1.385(4) |
| C25-C26 | 1.386(4) | C26-C27 | 1.386(4) | C26-C29 | 1.512(4) |
| C27-C28 | 1.386(4) |         |          |         |          |

Table 6 . Bond Angles in Compound 26, °

|             |          |             |          |             |          |
|-------------|----------|-------------|----------|-------------|----------|
| C14-O1-C7   | 115.7(2) | O3-N1-C18   | 117.3(3) | O4-N1-O3    | 124.7(2) |
| O4-N1-C18   | 118.0(2) | C6-C1-C2    | 110.3(2) | C6-C1-C7    | 115.8(2) |
| C7-C1-C2    | 114.1(2) | C3-C2-C1    | 111.9(2) | C21-C2-C1   | 110.4(2) |
| C21-C2-C3   | 115.8(2) | C4-C3-C2    | 111.4(2) | C3-C4-C5    | 111.4(2) |
| C6-C5-C4    | 110.9(2) | C1-C6-C5    | 114.2(2) | O1-C7-C1    | 109.7(2) |
| O1-C7-C8    | 110.8(2) | C8-C7-C1    | 111.8(2) | C9-C8-C7    | 123.2(2) |
| C9-C8-C13   | 119.1(2) | C13-C8-C7   | 117.7(2) | C8-C9-C10   | 120.1(2) |
| C11-C10-C9  | 120.2(3) | C10-C11-C12 | 120.3(2) | C11-C12-C13 | 119.8(2) |
| C12-C13-C8  | 120.5(3) | O1-C14-C15  | 111.6(2) | O2-C14-O1   | 125.0(2) |
| O2-C14-C15  | 123.4(2) | C16-C15-C14 | 116.8(2) | C20-C15-C14 | 123.3(2) |
| C20-C15-C16 | 119.9(2) | C15-C16-C17 | 120.3(3) | C18-C17-C16 | 118.3(3) |
| C17-C18-N1  | 118.7(2) | C17-C18-C19 | 122.7(2) | C19-C18-N1  | 118.5(3) |
| C18-C19-C20 | 118.1(3) | C19-C20-C15 | 120.7(3) | C22-C21-C2  | 123.5(2) |
| C22-C21-C23 | 120.4(2) | C23-C21-C2  | 116.0(2) | C24-C23-C21 | 121.3(2) |
| C24-C23-C28 | 117.7(2) | C28-C23-C21 | 121.0(2) | C25-C24-C23 | 121.2(3) |
| C24-C25-C26 | 121.1(3) | C25-C26-C27 | 117.9(3) | C25-C26-C29 | 121.3(3) |
| C27-C26-C29 | 120.8(3) | C28-C27-C26 | 121.8(2) | C27-C28-C23 | 120.4(3) |

This report has been created with Olex2 [6], compiled on 2015.09.30 svn.r3233 for OlexSys.

#### Reference

- [1] APEX2 2014.11-0
- [2] SAINT v8.34A
- [3] SADABS v2014/5
- [4] SHELXS-97
- [5] SHELXL-2014/7
- [6] Olex2 (Dolomanov et al., 2009)

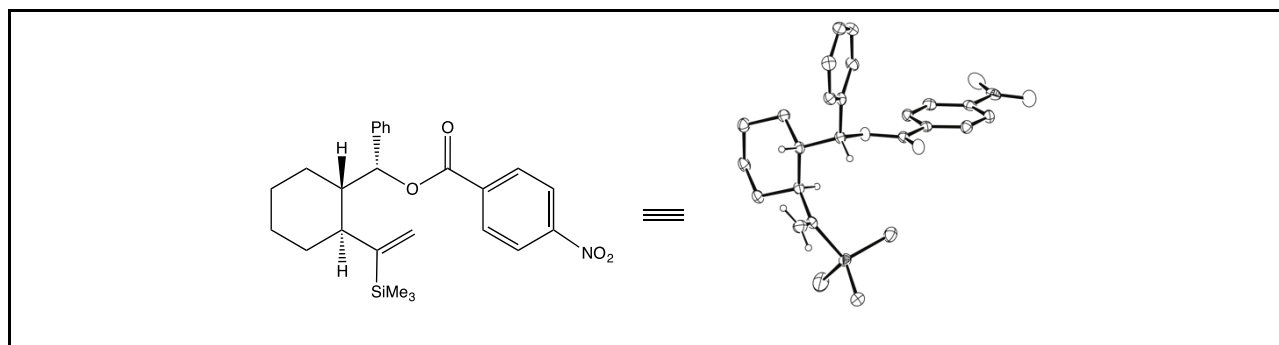

Compound 27,  $C_{25}H_{31}NO_4Si$ , crystallizes in the monoclinic space group  $P2_1/c$  (systematic absences  $0k0$ :  $k=\text{odd}$  and  $h0l$ :  $l=\text{odd}$ ) with  $a=7.3090(5)\text{\AA}$ ,  $b=15.1112(11)\text{\AA}$ ,  $c=21.9523(16)\text{\AA}$ ,  $\beta=90.131(3)^\circ$ ,  $V=2424.6(3)\text{\AA}^3$ ,  $Z=4$ , and  $d_{\text{calc}}=1.199\text{ g/cm}^3$ . X-ray intensity data were collected on a Bruker APEXII [1] CCD area detector employing graphite-monochromated Mo-K $\alpha$  radiation ( $\lambda=0.71073\text{\AA}$ ) at a temperature of 100K. Preliminary indexing was performed from a series of thirty-six  $0.5^\circ$  rotation frames with exposures of 10 seconds. A total of 3872 frames were collected with a crystal to detector distance of 37.5 mm, rotation widths of  $0.5^\circ$  and exposures of 10 seconds:

| scan type | $2\theta$ | $\omega$ | $\varphi$ | $\chi$ | Frames |
|-----------|-----------|----------|-----------|--------|--------|
| $\phi$    | -23.00    | 315.83   | 12.48     | 28.88  | 727    |
| $\phi$    | -23.00    | 334.21   | 38.95     | 73.66  | 739    |
| $\phi$    | -15.50    | 258.48   | 8.28      | 19.46  | 739    |
| $\phi$    | 19.50     | 59.55    | 348.71    | -26.26 | 739    |
| $\phi$    | -23.00    | 123.37   | 310.10    | -94.51 | 708    |
| $\phi$    | -18.00    | 124.02   | 293.36    | -95.28 | 220    |

Rotation frames were integrated using SAINT [2], producing a listing of unaveraged  $F^2$  and  $\sigma(F^2)$  values. A total of 72039 reflections were measured over the ranges  $3.272 \leq 2\theta \leq 50.74^\circ$ ,  $-8 \leq h \leq 8$ ,  $-18 \leq k \leq 18$ ,  $-26 \leq l \leq 24$  yielding 4450 unique reflections ( $R_{\text{int}} = 0.0187$ ). The intensity data were corrected for Lorentz and polarization effects and for absorption using SADABS [3] (minimum and maximum transmission 0.7262, 0.7452). The structure was solved by direct methods - SHELXS-97 [4]. Refinement was by full-matrix least squares based on  $F^2$  using SHELXL-2014 [5]. All reflections were used during refinement. The weighting scheme used was  $w=1/[\sigma^2(F_o^2) + (0.0385P)^2 + 1.1817P]$  where  $P = (F_o^2 + 2F_c^2)/3$ . Non-hydrogen atoms were refined anisotropically and hydrogen atoms were refined using a riding model. Refinement converged to  $R1=0.0301$  and  $wR2=0.0797$  for 4221 observed reflections for which  $F > 4\sigma(F)$

and  $R1=0.0316$  and  $wR2=0.0810$  and  $GOF = 1.030$  for all 4450 unique, non-zero reflections and 283 variables. The maximum  $\Delta/\sigma$  in the final cycle of least squares was 0.001 and the two most prominent peaks in the final difference Fourier were  $+0.30$  and  $-0.27 \text{ e}/\text{\AA}^3$ .

Table 1. lists cell information, data collection parameters, and refinement data. Final positional and equivalent isotropic thermal parameters are given in Tables 2. and 3. Anisotropic thermal parameters are in Table 4. Tables 5. and 6. list bond distances and bond angles. Figure 1. is an ORTEP representation of the molecule with 50% probability thermal ellipsoids displayed.

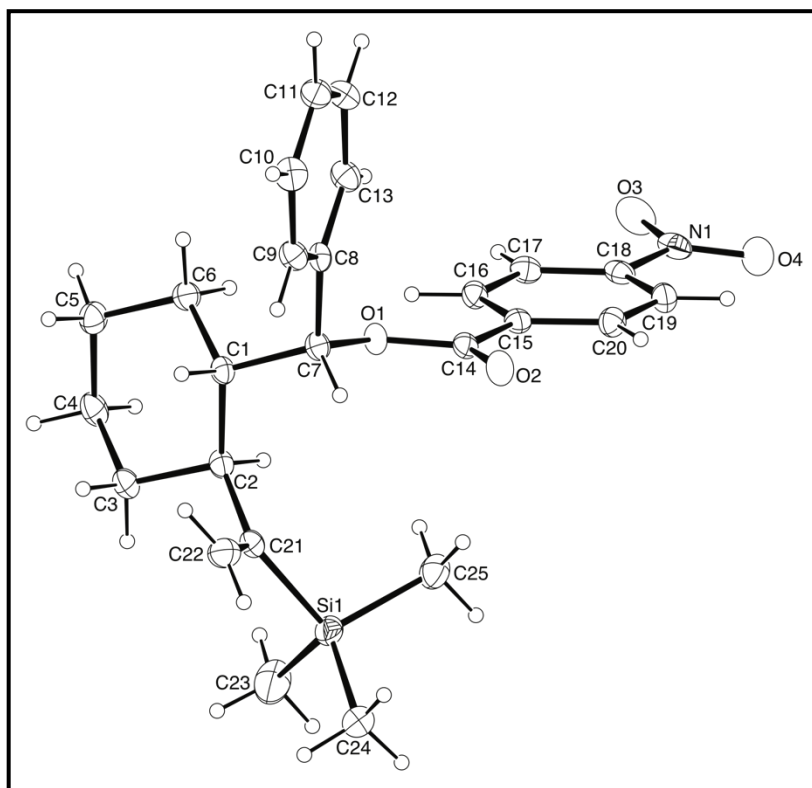

Figure 1. ORTEP drawing of the title compound with 50% thermal ellipsoids.



Table 1. Summary of Structure Determination of Compound 27

|                                                       |                                                    |
|-------------------------------------------------------|----------------------------------------------------|
| Empirical formula                                     | C <sub>25</sub> H <sub>31</sub> NO <sub>4</sub> Si |
| Formula weight                                        | 437.60                                             |
| Temperature/K                                         | 100                                                |
| Crystal system                                        | monoclinic                                         |
| Space group                                           | P2 <sub>1</sub> /c                                 |
| a                                                     | 7.3090(5)Å                                         |
| b                                                     | 15.1112(11)Å                                       |
| c                                                     | 21.9523(16)Å                                       |
| $\beta$                                               | 90.131(3)°                                         |
| Volume                                                | 2424.6(3)Å <sup>3</sup>                            |
| Z                                                     | 4                                                  |
| d <sub>calc</sub>                                     | 1.199 g/cm <sup>3</sup>                            |
| $\mu$                                                 | 0.126 mm <sup>-1</sup>                             |
| F(000)                                                | 936.0                                              |
| Crystal size, mm                                      | 0.38 × 0.25 × 0.2                                  |
| <b>2<math>\theta</math> range for data collection</b> | 3.272 - 50.74°                                     |
| Index ranges                                          | <b>-8 ≤ h ≤ 8, -18 ≤ k ≤ 18, -26 ≤ l ≤ 24</b>      |
| Reflections collected                                 | 72039                                              |
| Independent reflections                               | 4450[R(int) = 0.0187]                              |
| Data/restraints/parameters                            | 4450/0/283                                         |
| Goodness-of-fit on F <sup>2</sup>                     | 1.030                                              |
| Final R indexes [I >= 2 $\sigma$ (I)]                 | R <sub>1</sub> = 0.0301, wR <sub>2</sub> = 0.0797  |
| Final R indexes [all data]                            | R <sub>1</sub> = 0.0316, wR <sub>2</sub> = 0.0810  |
| Largest diff. peak/hole                               | 0.30/-0.27 eÅ <sup>-3</sup>                        |

Table 2 . Refined Positional Parameters for Compound 27

| Atom | x           | y           | z          | U(eq)     |
|------|-------------|-------------|------------|-----------|
| C1   | 0.91840(15) | 0.77229(7)  | 0.22710(5) | 15.4(2)   |
| C2   | 0.82918(15) | 0.73327(7)  | 0.28495(5) | 16.4(2)   |
| C3   | 0.73501(16) | 0.80711(8)  | 0.32198(5) | 20.0(2)   |
| C4   | 0.59398(16) | 0.85745(8)  | 0.28419(5) | 22.0(3)   |
| C5   | 0.68415(16) | 0.89776(8)  | 0.22821(5) | 21.4(3)   |
| C6   | 0.77882(16) | 0.82663(8)  | 0.19045(5) | 18.7(2)   |
| C7   | 1.00622(15) | 0.70016(7)  | 0.18727(5) | 15.6(2)   |
| C8   | 1.10465(15) | 0.73676(7)  | 0.13195(5) | 16.0(2)   |
| C9   | 1.28151(15) | 0.76973(8)  | 0.13817(5) | 18.9(2)   |
| C10  | 1.37153(16) | 0.80738(8)  | 0.08885(6) | 22.9(3)   |
| C11  | 1.28604(17) | 0.81177(8)  | 0.03243(5) | 22.9(3)   |
| C12  | 1.11118(17) | 0.77782(8)  | 0.02561(5) | 23.3(3)   |
| C13  | 1.02085(16) | 0.74081(8)  | 0.07499(5) | 20.7(2)   |
| C14  | 0.90051(15) | 0.56221(7)  | 0.14790(5) | 16.2(2)   |
| C15  | 0.74098(15) | 0.51688(7)  | 0.11863(5) | 15.8(2)   |
| C16  | 0.57030(15) | 0.55746(8)  | 0.11347(5) | 17.5(2)   |
| C17  | 0.42723(16) | 0.51424(8)  | 0.08433(5) | 18.6(2)   |
| C18  | 0.45999(16) | 0.43052(8)  | 0.06126(5) | 17.7(2)   |
| C19  | 0.62764(16) | 0.38863(8)  | 0.06567(5) | 20.1(2)   |
| C20  | 0.76940(16) | 0.43274(8)  | 0.09457(5) | 18.7(2)   |
| C21  | 0.95841(16) | 0.68110(8)  | 0.32640(5) | 18.1(2)   |
| C22  | 1.12565(17) | 0.71073(8)  | 0.33980(5) | 23.7(3)   |
| C23  | 0.6601(2)   | 0.59547(10) | 0.40570(8) | 40.6(4)   |
| C24  | 1.0490(2)   | 0.52162(9)  | 0.40854(6) | 32.7(3)   |
| C25  | 0.80887(18) | 0.49900(8)  | 0.29534(6) | 25.4(3)   |
| N1   | 0.30911(14) | 0.38349(7)  | 0.03034(4) | 21.8(2)   |
| O1   | 0.85599(10) | 0.64361(5)  | 0.16728(3) | 16.44(17) |
| O2   | 1.05062(11) | 0.52973(5)  | 0.15300(4) | 20.91(19) |
| O3   | 0.16568(12) | 0.42341(7)  | 0.02162(4) | 29.8(2)   |
| O4   | 0.33585(13) | 0.30634(6)  | 0.01486(4) | 31.3(2)   |
| Si1  | 0.87069(5)  | 0.57438(2)  | 0.35964(2) | 21.94(10) |

Table 3 . Positional Parameters for Hydrogens in Compound 27

| Atom | x      | y      | z       | U(eq) |
|------|--------|--------|---------|-------|
| H1   | 1.0159 | 0.8126 | 0.2402  | 20    |
| H2   | 0.7332 | 0.6924 | 0.2715  | 22    |
| H3a  | 0.6752 | 0.7812 | 0.3571  | 27    |
| H3b  | 0.827  | 0.8482 | 0.3367  | 27    |
| H4a  | 0.4972 | 0.8175 | 0.2716  | 29    |
| H4b  | 0.5398 | 0.904  | 0.3087  | 29    |
| H5a  | 0.7732 | 0.9417 | 0.2409  | 28    |
| H5b  | 0.5922 | 0.9272 | 0.2035  | 28    |
| H6a  | 0.8408 | 0.8546 | 0.1565  | 25    |
| H6b  | 0.6869 | 0.787  | 0.1739  | 25    |
| H7   | 1.0921 | 0.6654 | 0.2119  | 21    |
| H9   | 1.3401 | 0.7665 | 0.1758  | 25    |
| H10  | 1.4893 | 0.8297 | 0.0937  | 30    |
| H11  | 1.3457 | 0.8373 | -0.0006 | 30    |
| H12  | 1.054  | 0.7798 | -0.0122 | 31    |
| H13  | 0.9032 | 0.7185 | 0.07    | 28    |
| H16  | 0.5523 | 0.6137 | 0.1296  | 23    |
| H17  | 0.3129 | 0.5407 | 0.0804  | 25    |
| H19  | 0.6448 | 0.3323 | 0.0496  | 27    |
| H20  | 0.8837 | 0.4061 | 0.0979  | 25    |
| H22a | 1.166  | 0.7643 | 0.3238  | 32    |
| H22b | 1.2019 | 0.6779 | 0.3651  | 32    |
| H23a | 0.5671 | 0.6208 | 0.3801  | 61    |
| H23b | 0.6884 | 0.6358 | 0.4382  | 61    |
| H23c | 0.6166 | 0.5407 | 0.4225  | 61    |
| H24a | 1.0063 | 0.4649 | 0.4222  | 49    |
| H24b | 1.0732 | 0.5587 | 0.4432  | 49    |
| H24c | 1.1593 | 0.5141 | 0.3855  | 49    |
| H25a | 0.9139 | 0.49   | 0.2699  | 38    |
| H25b | 0.7122 | 0.5251 | 0.2717  | 38    |
| H25c | 0.7687 | 0.4432 | 0.3113  | 38    |

Table 4 . Refined Thermal Parameters (U's) for Compound 27

| Atom | U <sub>11</sub> | U <sub>22</sub> | U <sub>33</sub> | U <sub>23</sub> | U <sub>13</sub> | U <sub>12</sub> |
|------|-----------------|-----------------|-----------------|-----------------|-----------------|-----------------|
| C1   | 0.0154(5)       | 0.0144(5)       | 0.0164(5)       | -0.0025(4)      | 0.0009(4)       | -0.0018(4)      |
| C2   | 0.0168(5)       | 0.0152(5)       | 0.0170(5)       | -0.0027(4)      | 0.0023(4)       | -0.0018(4)      |
| C3   | 0.0220(6)       | 0.0202(6)       | 0.0177(5)       | -0.0038(4)      | 0.0029(4)       | 0.0019(5)       |
| C4   | 0.0205(6)       | 0.0243(6)       | 0.0214(6)       | -0.0064(5)      | 0.0023(5)       | 0.0048(5)       |
| C5   | 0.0205(6)       | 0.0196(6)       | 0.0239(6)       | -0.0017(5)      | -0.0004(5)      | 0.0042(5)       |
| C6   | 0.0193(6)       | 0.0187(6)       | 0.0181(5)       | -0.0002(4)      | 0.0012(4)       | 0.0018(5)       |
| C7   | 0.0139(5)       | 0.0158(5)       | 0.0172(5)       | -0.0026(4)      | -0.0007(4)      | -0.0021(4)      |
| C8   | 0.0166(5)       | 0.0139(5)       | 0.0174(5)       | -0.0034(4)      | 0.0019(4)       | 0.0015(4)       |
| C9   | 0.0172(6)       | 0.0213(6)       | 0.0184(6)       | -0.0022(4)      | -0.0008(4)      | 0.0004(4)       |
| C10  | 0.0174(6)       | 0.0250(6)       | 0.0262(6)       | -0.0006(5)      | 0.0033(5)       | -0.0026(5)      |
| C11  | 0.0263(6)       | 0.0225(6)       | 0.0198(6)       | 0.0006(5)       | 0.0070(5)       | 0.0006(5)       |
| C12  | 0.0280(6)       | 0.0259(6)       | 0.0161(6)       | -0.0018(5)      | -0.0012(5)      | -0.0003(5)      |
| C13  | 0.0194(6)       | 0.0230(6)       | 0.0197(6)       | -0.0031(5)      | -0.0007(5)      | -0.0028(5)      |
| C14  | 0.0184(6)       | 0.0157(5)       | 0.0145(5)       | -0.0008(4)      | 0.0048(4)       | -0.0007(4)      |
| C15  | 0.0168(5)       | 0.0166(5)       | 0.0139(5)       | 0.0008(4)       | 0.0035(4)       | -0.0021(4)      |
| C16  | 0.0196(6)       | 0.0160(5)       | 0.0170(5)       | -0.0011(4)      | 0.0046(4)       | 0.0000(4)       |
| C17  | 0.0161(5)       | 0.0232(6)       | 0.0164(5)       | 0.0013(4)       | 0.0030(4)       | 0.0000(5)       |
| C18  | 0.0193(6)       | 0.0217(6)       | 0.0122(5)       | 0.0012(4)       | 0.0010(4)       | -0.0065(4)      |
| C19  | 0.0259(6)       | 0.0160(6)       | 0.0186(6)       | -0.0026(4)      | 0.0019(5)       | -0.0019(5)      |
| C20  | 0.0181(6)       | 0.0178(6)       | 0.0203(6)       | -0.0007(4)      | 0.0021(4)       | 0.0016(4)       |
| C21  | 0.0226(6)       | 0.0166(5)       | 0.0152(5)       | -0.0024(4)      | 0.0041(4)       | 0.0015(4)       |
| C22  | 0.0263(6)       | 0.0236(6)       | 0.0212(6)       | 0.0022(5)       | -0.0021(5)      | -0.0003(5)      |
| C23  | 0.0469(9)       | 0.0283(7)       | 0.0468(9)       | 0.0015(6)       | 0.0270(7)       | -0.0020(6)      |
| C24  | 0.0521(9)       | 0.0218(6)       | 0.0240(6)       | 0.0020(5)       | -0.0022(6)      | 0.0035(6)       |
| C25  | 0.0274(6)       | 0.0188(6)       | 0.0300(7)       | 0.0008(5)       | 0.0028(5)       | -0.0026(5)      |
| N1   | 0.0234(5)       | 0.0280(6)       | 0.0139(5)       | 0.0005(4)       | 0.0008(4)       | -0.0073(4)      |
| O1   | 0.0146(4)       | 0.0143(4)       | 0.0205(4)       | -0.0044(3)      | 0.0012(3)       | -0.0017(3)      |
| O2   | 0.0164(4)       | 0.0206(4)       | 0.0257(4)       | -0.0051(3)      | 0.0010(3)       | 0.0018(3)       |
| O3   | 0.0202(5)       | 0.0420(6)       | 0.0270(5)       | -0.0059(4)      | -0.0028(4)      | -0.0024(4)      |
| O4   | 0.0378(5)       | 0.0239(5)       | 0.0322(5)       | -0.0050(4)      | -0.0092(4)      | -0.0076(4)      |
| Si1  | 0.02778(19)     | 0.01685(17)     | 0.02122(18)     | 0.00114(12)     | 0.00727(13)     | 0.00048(13)     |

Table 5 . Bond Distances in Compound 27, Å

|         |            |         |            |         |            |
|---------|------------|---------|------------|---------|------------|
| C1-C2   | 1.5457(15) | C1-C6   | 1.5358(15) | C1-C7   | 1.5386(15) |
| C2-C3   | 1.5435(15) | C2-C21  | 1.5289(16) | C3-C4   | 1.5250(16) |
| C4-C5   | 1.5228(17) | C5-C6   | 1.5245(16) | C7-C8   | 1.5172(15) |
| C7-O1   | 1.4581(13) | C8-C9   | 1.3918(16) | C8-C13  | 1.3924(16) |
| C9-C10  | 1.3901(17) | C10-C11 | 1.3875(18) | C11-C12 | 1.3850(18) |
| C12-C13 | 1.3882(17) | C14-C15 | 1.4962(15) | C14-O1  | 1.3418(14) |
| C14-O2  | 1.2069(14) | C15-C16 | 1.3944(16) | C15-C20 | 1.3925(16) |
| C16-C17 | 1.3877(16) | C17-C18 | 1.3839(17) | C18-C19 | 1.3824(17) |
| C18-N1  | 1.4759(14) | C19-C20 | 1.3847(17) | C21-C22 | 1.3340(17) |
| C21-Si1 | 1.8833(12) | C23-Si1 | 1.8712(14) | C24-Si1 | 1.8655(14) |
| C25-Si1 | 1.8684(13) | N1-O3   | 1.2242(14) | N1-O4   | 1.2301(14) |

Table 6 . Bond Angles in Compound 27, °

|             |            |             |            |             |            |
|-------------|------------|-------------|------------|-------------|------------|
| C6-C1-C2    | 110.69(9)  | C6-C1-C7    | 111.01(9)  | C7-C1-C2    | 111.96(9)  |
| C3-C2-C1    | 110.27(9)  | C21-C2-C1   | 115.11(9)  | C21-C2-C3   | 109.57(9)  |
| C4-C3-C2    | 112.07(9)  | C5-C4-C3    | 110.20(10) | C4-C5-C6    | 110.76(10) |
| C5-C6-C1    | 113.20(9)  | C8-C7-C1    | 113.32(9)  | O1-C7-C1    | 105.75(8)  |
| O1-C7-C8    | 109.33(8)  | C9-C8-C7    | 119.60(10) | C9-C8-C13   | 118.62(10) |
| C13-C8-C7   | 121.76(10) | C10-C9-C8   | 120.75(11) | C11-C10-C9  | 120.12(11) |
| C12-C11-C10 | 119.50(11) | C11-C12-C13 | 120.35(11) | C12-C13-C8  | 120.66(11) |
| O1-C14-C15  | 111.50(9)  | O2-C14-C15  | 124.12(10) | O2-C14-O1   | 124.37(10) |
| C16-C15-C14 | 121.99(10) | C20-C15-C14 | 117.65(10) | C20-C15-C16 | 120.33(10) |
| C17-C16-C15 | 120.23(11) | C18-C17-C16 | 117.91(11) | C17-C18-N1  | 118.61(10) |
| C19-C18-C17 | 123.17(11) | C19-C18-N1  | 118.23(10) | C18-C19-C20 | 118.29(11) |
| C19-C20-C15 | 120.08(11) | C2-C21-Si1  | 117.50(8)  | C22-C21-C2  | 121.51(11) |
| C22-C21-Si1 | 120.97(9)  | O3-N1-C18   | 118.25(10) | O3-N1-O4    | 124.08(10) |
| O4-N1-C18   | 117.67(10) | C14-O1-C7   | 116.72(8)  | C23-Si1-C21 | 110.17(6)  |
| C24-Si1-C21 | 110.54(6)  | C24-Si1-C23 | 109.65(7)  | C24-Si1-C25 | 109.97(6)  |
| C25-Si1-C21 | 108.14(5)  | C25-Si1-C23 | 108.32(7)  |             |            |

This report has been created with Olex2 [6], compiled on 2015.09.30 svn.r3233 for OlexSys.

#### Reference

- [1] APEX2 2014.11-0
- [2] SAINT v8.34A
- [3] SADABS v2014/5
- [4] SHELXS-97
- [5] SHELXL-2014/7
- [6] Olex2 (Dolomanov et al., 2009)
